# Supplementary material
Source: publisher site journal article supplement (https://www.dovepress.com/get_supplementary_file.php?f=301663.xlsx)
Supplement: Supplementary file 1 [file get_supplementary_file.php]

## Sheet: Table S1
Table S1 Differentially expressed genes between sepsis and control samples in the GSE13904 dataset (children).
DEG	logFC	AveExpr	t	P.Value	adj.P.Val	B
MMP8	5.23337	8.17022	8.6528	2.98617e-15	1.11096e-12	24.1407
CD177	4.70006	10.3603	11.0269	7.3616e-22	1.36939e-18	38.9348
OLFM4	4.40468	7.64211	6.57448	5.28478e-10	2.44274e-08	12.4292
MMP9	3.82642	10.7851	10.1814	1.85647e-19	2.53247e-16	33.5569
MCEMP1	3.81821	11.1639	14.237	3.72709e-31	7.62637e-27	59.715
ANXA3	3.74071	10.0777	11.8259	3.69913e-24	1.89229e-20	44.0805
LTF	3.69672	9.23924	7.84441	3.94516e-13	6.45808e-11	19.3994
CEACAM8	3.55392	7.01281	6.71277	2.49319e-10	1.26276e-08	13.1548
IL1R2	3.52112	10.8875	8.592	4.3405e-15	1.50534e-12	23.7774
LCN2	3.38674	9.02225	6.98953	5.40277e-11	3.59499e-09	14.6333
HP	3.27821	8.38307	8.9085	6.12708e-16	3.21468e-13	25.6797
RETN	3.24412	9.1235	7.66529	1.13133e-12	1.4926e-10	18.3777
GPR84	3.0771	7.91684	8.6815	2.5019e-15	9.70003e-13	24.3126
OLAH	3.00291	7.02847	6.09215	6.76139e-09	2.02564e-07	9.97149
VNN1	2.99657	9.14924	9.03382	2.80231e-16	1.63831e-13	26.44
CLEC5A	2.78332	6.77385	7.83225	4.239e-13	6.82979e-11	19.3297
BMX	2.77049	7.05459	9.47569	1.72585e-17	1.53541e-14	29.1496
ANKRD22	2.76075	8.31258	7.83753	4.10895e-13	6.6728e-11	19.36
TCN1	2.67542	8.28063	6.80279	1.52174e-10	8.43842e-09	13.6319
S100A12	2.62914	12.853	13.1948	3.95386e-28	2.6968e-24	52.9603
GYG1	2.5817	10.7968	9.71666	3.70977e-18	3.61473e-15	30.6445
FCGR1B	2.50015	10.113	8.11818	7.72029e-14	1.61197e-11	20.9822
CYSTM1	2.49901	11.0803	10.5121	2.15864e-20	3.155e-17	35.6495
CLEC4D	2.4698	8.3541	8.09223	9.0208e-14	1.82756e-11	20.8311
CRISP3	2.43775	5.36747	5.96781	1.2799e-08	3.45505e-07	9.35738
IL18R1	2.43474	8.00596	6.48089	8.74305e-10	3.67352e-08	11.9433
TDRD9	2.42441	7.20914	6.70701	2.57287e-10	1.29597e-08	13.1244
PFKFB3	2.36784	9.5517	8.30876	2.44514e-14	6.028e-12	22.0984
DYSF	2.36064	10.14	11.0719	5.47127e-22	1.11953e-18	39.2233
LOC100134822	2.33784	7.17535	8.24778	3.53672e-14	8.33441e-12	21.7401
ST3GAL4-AS1	2.32201	7.21482	8.24365	3.62606e-14	8.43142e-12	21.7158
MGAM	2.32139	10.0281	8.76846	1.46176e-15	6.50231e-13	24.8347
ALPL	2.31805	7.60386	7.74265	7.18774e-13	1.03574e-10	18.8176
RGL4	2.31198	8.54432	7.76723	6.22001e-13	9.32223e-11	18.9578
CA4	2.31067	8.09523	8.53333	6.2212e-15	2.0532e-12	23.4277
IRAK3	2.30396	7.84971	9.72021	3.62632e-18	3.61473e-15	30.6666
LRG1	2.29322	9.0012	9.41803	2.48893e-17	2.03714e-14	28.7936
TLR5	2.27305	8.95715	9.96887	7.3362e-19	9.38208e-16	32.2206
DEFA4	2.27138	8.46593	4.21039	4.04943e-05	0.000331836	1.67171
S100P	2.25465	11.2464	7.65874	1.17547e-12	1.5235e-10	18.3406
PGLYRP1	2.24171	8.86052	8.257	3.34498e-14	8.05236e-12	21.7942
MS4A4A	2.23239	7.60411	7.33517	7.64718e-12	7.34632e-10	16.5258
HK3	2.1642	10.053	8.74748	1.6645e-15	6.95082e-13	24.7085
C3AR1	2.12902	9.37131	8.7014	2.21282e-15	8.8782e-13	24.4319
ADM	2.10329	9.19009	8.65873	2.87886e-15	1.09088e-12	24.1762
CYP1B1	2.06806	7.92128	7.3983	5.32322e-12	5.39227e-10	16.8768
SLC2A3	2.06166	9.66822	9.77279	2.58885e-18	2.78806e-15	30.9943
BCL2A1	2.03517	9.87029	6.53754	6.44972e-10	2.88153e-08	12.2369
GPR97	1.99285	9.11878	8.75546	1.58432e-15	6.75382e-13	24.7565
CST7	1.97689	11.1781	6.74147	2.13089e-10	1.11231e-08	13.3065
CEACAM1	1.9494	7.40814	7.77965	5.78133e-13	8.76278e-11	19.0288
NAIP	1.94857	7.63525	8.55463	5.4598e-15	1.83145e-12	23.5545
FOLR3	1.94532	8.7725	5.3354	2.88619e-07	4.92554e-06	6.36788
ELANE	1.90365	7.32698	4.56839	9.18294e-06	9.31588e-05	3.07275
GADD45A	1.89415	8.30627	6.9889	5.42187e-11	3.59499e-09	14.6298
PYGL	1.89011	9.82089	7.89457	2.93137e-13	5.04048e-11	19.6876
PLBD1	1.88665	11.6459	8.91708	5.80821e-16	3.12757e-13	25.7316
METTL7B	1.88169	6.61458	5.77543	3.38061e-08	7.96018e-07	8.42376
B4GALT5	1.86365	9.37467	8.10094	8.56177e-14	1.75191e-11	20.8818
PSTPIP2	1.84606	8.28658	6.98245	5.62071e-11	3.67425e-09	14.595
UPP1	1.83666	9.02693	8.71696	2.01e-15	8.22573e-13	24.5253
IL18RAP	1.80951	10.7642	6.45935	9.81131e-10	4.0313e-08	11.832
CD163	1.80773	7.42907	4.66294	6.11696e-06	6.56346e-05	3.45786
MANSC1	1.80755	8.80469	6.85675	1.12994e-10	6.51292e-09	13.9197
SLC26A8	1.78917	6.67488	8.8867	7.01773e-16	3.58992e-13	25.5478
FKBP5	1.7865	9.25126	6.38816	1.43383e-09	5.49502e-08	11.466
LOC101928429	1.78344	7.48676	7.76319	6.36984e-13	9.4449e-11	18.9347
DHRS9	1.77714	8.75269	5.49091	1.36986e-07	2.62318e-06	7.08138
ACSL1	1.7765	11.1626	8.55806	5.34618e-15	1.82323e-12	23.5749
SLC22A4	1.77191	9.01158	8.31209	2.39639e-14	6.028e-12	22.118
ORM1	1.77181	7.28964	5.84533	2.38088e-08	5.9703e-07	8.76059
NLRC4	1.77157	7.03711	6.8522	1.15875e-10	6.62299e-09	13.8954
ST6GALNAC3	1.76192	6.36103	7.56446	2.03677e-12	2.42304e-10	17.8077
CDA	1.76115	9.37437	7.97474	1.82031e-13	3.32565e-11	20.1498
OSCAR	1.75981	7.64394	7.66477	1.13478e-12	1.4926e-10	18.3748
BCL6	1.75704	10.5195	7.9147	2.60136e-13	4.62853e-11	19.8034
DAAM2	1.75416	6.75897	5.8078	2.87496e-08	6.97006e-07	8.5794
MAPK14	1.75401	8.58809	8.1456	6.54789e-14	1.42535e-11	21.1421
DACH1	1.73513	6.49382	6.53403	6.5726e-10	2.92367e-08	12.2187
GAS7	1.70912	8.39301	9.02416	2.97687e-16	1.69202e-13	26.3812
FGF13	1.70893	5.60693	4.41936	1.72122e-05	0.000158933	2.47842
SLPI	1.70221	8.75268	6.13774	5.33993e-09	1.66761e-07	10.1987
SIGLEC5	1.70055	8.94806	8.46137	9.66165e-15	2.82424e-12	23.0001
RNASE2	1.69702	10.4367	6.52485	6.90517e-10	3.02017e-08	12.171
SERPINB1	1.69165	9.77358	8.13752	6.87362e-14	1.48051e-11	21.095
GRB10	1.68775	6.84004	8.05976	1.09569e-13	2.11509e-11	20.6424
AGPAT9	1.68771	9.01541	7.18015	1.84904e-11	1.47218e-09	15.6709
FCAR	1.66195	6.69377	8.60681	3.96294e-15	1.3981e-12	23.8658
TNFAIP6	1.64467	9.69046	6.07122	7.53206e-09	2.20173e-07	9.86758
RNASE3	1.64347	7.55561	5.56005	9.7909e-08	1.97575e-06	7.40326
LOC441081	1.63972	6.01342	6.93605	7.27918e-11	4.48635e-09	14.3449
RAB13	1.63454	7.06655	9.09659	1.89117e-16	1.13815e-13	26.8222
ZDHHC19	1.62549	6.80801	5.11261	8.18831e-07	1.18914e-05	5.37149
PROK2	1.62301	10.5193	5.80212	2.95802e-08	7.13763e-07	8.55203
FCER1G	1.61903	11.5737	8.41513	1.281e-14	3.59065e-12	22.7262
IL10RB-AS1	1.61901	5.96863	7.99049	1.65728e-13	3.05507e-11	20.2409
CARD6	1.61223	8.94967	8.46679	9.34675e-15	2.77179e-12	23.0323
CD63	1.60771	11.0781	8.35751	1.81897e-14	4.77176e-12	22.3857
FAM129A	1.60068	10.7023	6.98383	5.57752e-11	3.65793e-09	14.6025
F5	1.59001	7.27158	6.38568	1.45285e-09	5.51544e-08	11.4533
SERPINB2	1.58789	6.51097	5.455	1.62913e-07	3.02542e-06	6.91533
GALNT14	1.5844	7.34224	6.94847	6.79297e-11	4.2507e-09	14.4118
C1QB	1.58158	5.35211	5.09369	8.93404e-07	1.27749e-05	5.28832
LTB4R	1.56873	7.41954	8.40689	1.34695e-14	3.72451e-12	22.6774
FAM20A	1.55227	5.57069	5.44577	1.70314e-07	3.13961e-06	6.87277
BST1	1.53715	8.53162	6.9344	7.34641e-11	4.51418e-09	14.336
GLT1D1	1.53532	9.79207	7.74803	6.96396e-13	1.01783e-10	18.8483
CKAP4	1.53331	7.80062	9.19334	1.02968e-16	6.79654e-14	27.4132
LMNB1	1.53175	7.68055	7.96973	1.87542e-13	3.396e-11	20.1209
SAMSN1	1.52692	7.53477	5.71782	4.5043e-08	1.02181e-06	8.14818
ECRP	1.5156	6.40919	7.90405	2.77113e-13	4.8464e-11	19.7421
MKNK1	1.51406	8.19539	8.07605	9.93909e-14	1.93689e-11	20.7371
PGS1	1.50864	8.48535	7.43266	4.36798e-12	4.63097e-10	17.0684
TSPO	1.50384	11.2423	7.91324	2.62394e-13	4.62853e-11	19.795
NCF4	1.50188	10.395	7.5166	2.6889e-12	3.00657e-10	17.5385
VSIG4	1.50146	6.90925	4.41159	1.77778e-05	0.000163565	2.44788
CEACAM6	1.50098	6.89173	4.29816	2.83737e-05	0.000244662	2.00671
FLOT2	1.4977	9.17487	7.20882	1.57166e-11	1.302e-09	15.8282
HPSE	1.48469	7.72321	6.08249	7.10704e-09	2.09847e-07	9.92349
HIST1H1C	1.48102	9.22651	6.61124	4.3318e-10	2.08069e-08	12.6212
TIMP1	1.47863	10.7207	6.99452	5.25433e-11	3.51353e-09	14.6602
KIF1B	1.47749	6.82009	11.1646	2.96895e-22	6.75007e-19	39.8177
DGAT2	1.47121	8.87816	6.60266	4.53784e-10	2.15938e-08	12.5764
WDFY3	1.4652	7.20935	9.48145	1.66383e-17	1.53541e-14	29.1852
SEMA4A	1.46301	7.56386	8.42138	1.23313e-14	3.50448e-12	22.7632
SUCNR1	1.45431	6.34108	5.83875	2.46103e-08	6.10395e-07	8.72878
ITGAM	1.4525	10.0061	7.15087	2.18219e-11	1.68498e-09	15.5105
TXN	1.44101	8.00982	7.60443	1.61403e-12	1.98953e-10	18.0332
S100A9	1.44067	13.8393	11.3262	1.01978e-22	2.60833e-19	40.8566
SULT1B1	1.4402	7.13183	7.82227	4.49651e-13	7.09173e-11	19.2725
PLSCR1	1.43868	8.10324	6.16702	4.58643e-09	1.46866e-07	10.3453
PADI4	1.43625	6.80572	8.34217	1.99661e-14	5.17146e-12	22.2952
TLR2	1.4317	10.7555	6.49652	8.04001e-10	3.4061e-08	12.0242
LIN7A	1.42378	5.78724	6.40502	1.31089e-09	5.12875e-08	11.5525
FFAR2	1.41911	8.76576	5.08231	9.41382e-07	1.33029e-05	5.23841
CR1	1.41232	7.665	8.30965	2.43204e-14	6.028e-12	22.1036
LY96	1.41093	9.7453	5.63816	6.67797e-08	1.43233e-06	7.77025
LIMK2	1.4061	7.82693	6.96023	6.36253e-11	4.04317e-09	14.4751
FPR2	1.40536	8.19192	5.77034	3.46761e-08	8.1463e-07	8.39935
METTL9	1.40154	9.03314	9.27861	6.01513e-17	4.24419e-14	27.9357
NFIL3	1.39773	8.75889	6.05546	8.16899e-09	2.35097e-07	9.78944
SORT1	1.39678	6.69316	7.6259	1.42407e-12	1.79812e-10	18.1546
UGCG	1.39484	9.02817	5.74568	3.92145e-08	9.01581e-07	8.28123
TIMP2	1.39387	8.91027	6.63892	3.72781e-10	1.81348e-08	12.7663
CPEB4	1.39096	8.21554	8.53065	6.32417e-15	2.05405e-12	23.4117
AP5B1	1.38957	6.78514	6.08723	6.93513e-09	2.0596e-07	9.94706
C1QA	1.38829	6.60425	4.73547	4.46128e-06	5.01347e-05	3.75742
GNS	1.3854	8.80363	7.385	5.74634e-12	5.72238e-10	16.8027
SIGLEC9	1.37976	7.04069	7.88209	3.15641e-13	5.33772e-11	19.6158
RAB31	1.37905	11.0116	7.26274	1.15658e-11	1.02008e-09	16.1252
CD14	1.37361	10.3858	5.26599	4.00682e-07	6.4659e-06	6.05415
CREB5	1.36688	9.85812	5.34785	2.72049e-07	4.68181e-06	6.42445
LILRA6	1.36374	9.12056	6.85747	1.12548e-10	6.50552e-09	13.9235
LILRA3	1.36042	8.45459	5.01399	1.28668e-06	1.73553e-05	4.94044
AZU1	1.35617	6.59528	3.53016	0.000529328	0.00300447	-0.727866
PRO2852	1.35411	8.05539	6.39167	1.40728e-09	5.43318e-08	11.4841
PRTN3	1.35196	4.82623	3.76759	0.000224225	0.00144008	0.0691644
AQP9	1.35146	11.9632	7.54793	2.24207e-12	2.60666e-10	17.7147
TLR8	1.35131	9.52354	5.85905	2.22184e-08	5.60582e-07	8.82704
MPO	1.34999	6.2054	4.32141	2.57994e-05	0.000225891	2.09639
IFI27	1.34739	7.89141	2.14713	0.0331429	0.0938125	-4.43502
MS4A3	1.3472	6.64833	3.2308	0.00147178	0.00719778	-1.66832
LINC01127	1.34264	6.18855	5.18652	5.81296e-07	8.91372e-06	5.6986
RRAGD	1.34081	7.37199	7.53356	2.43713e-12	2.80205e-10	17.6338
STOM	1.34058	8.09664	9.17155	1.18097e-16	7.3227e-14	27.2799
GRN	1.33928	9.14427	6.58134	5.09263e-10	2.37912e-08	12.465
SIPA1L2	1.33643	6.44432	7.65861	1.17639e-12	1.5235e-10	18.3399
CTSD	1.32876	7.50343	6.96211	6.29597e-11	4.01334e-09	14.4853
QPCT	1.32693	9.87559	6.0584	8.04642e-09	2.32551e-07	9.80399
NQO2	1.32157	7.99883	8.08912	9.19004e-14	1.84359e-11	20.8131
AIM2	1.31975	7.89722	4.81719	3.11348e-06	3.69283e-05	4.09919
HIST1H2BD	1.31864	8.64506	6.82818	1.32305e-10	7.47849e-09	13.7672
FGD4	1.31864	6.31582	7.08086	3.23841e-11	2.3498e-09	15.1285
PLIN3	1.31624	9.26548	6.20743	3.71521e-09	1.22614e-07	10.5482
FLOT1	1.3162	8.44002	8.7595	1.54519e-15	6.72718e-13	24.7808
DRAM1	1.31556	7.88902	7.40897	5.00641e-12	5.1478e-10	16.9362
ACER3	1.31193	6.75074	6.98138	5.65452e-11	3.67425e-09	14.5892
KCNJ15	1.30845	7.93748	6.09517	6.65652e-09	2.00566e-07	9.98654
ARG1	1.30605	5.0602	9.18343	1.09591e-16	7.00768e-14	27.3526
HCK	1.29787	11.2362	6.35919	1.67205e-09	6.18989e-08	11.3178
PRKCD	1.29647	8.5493	5.76201	3.61491e-08	8.44388e-07	8.3594
MAP2K6	1.29398	5.96334	6.73548	2.202e-10	1.13209e-08	13.2748
MCTP2	1.2914	7.72694	7.65518	1.20023e-12	1.54459e-10	18.3204
SPI1	1.29089	8.30027	6.60211	4.55143e-10	2.16082e-08	12.5735
ALOX5AP	1.2875	12.265	7.46394	3.64663e-12	3.99023e-10	17.2433
AGTRAP	1.28705	8.3742	7.25964	1.17717e-11	1.02937e-09	16.1081
2021-03-01	1.28373	8.80258	6.98432	5.5623e-11	3.65793e-09	14.6051
SQRDL	1.28218	10.3604	7.08232	3.21193e-11	2.34707e-09	15.1364
DNAJC3	1.28212	8.00895	6.0924	6.75258e-09	2.02564e-07	9.97274
MRVI1	1.2807	7.56645	6.17039	4.50657e-09	1.4499e-07	10.3622
G0S2	1.27968	7.29448	4.82538	3.0026e-06	3.58037e-05	4.13367
OPLAH	1.27459	5.99428	5.98267	1.18643e-08	3.24556e-07	9.43033
LRRN1	1.2701	4.13873	5.31298	3.2099e-07	5.37488e-06	6.2662
LILRA5	1.26561	7.28692	6.36895	1.58776e-09	5.96122e-08	11.3677
CEBPD	1.26414	8.14182	6.02081	9.76038e-09	2.75471e-07	9.61814
WIPI1	1.26044	7.48125	5.95527	1.36437e-08	3.63239e-07	9.2959
ZYX	1.25884	9.25101	6.11241	6.08874e-09	1.8623e-07	10.0724
ASAP1-IT1	1.25876	7.50356	5.67092	5.68196e-08	1.2448e-06	7.92523
FBXO6	1.25468	7.29548	4.22117	3.87748e-05	0.000319923	1.71255
C5AR1	1.25115	10.24	6.21074	3.65143e-09	1.21489e-07	10.5649
ATP8B4	1.24671	5.82452	4.04454	7.81451e-05	0.000585931	1.05419
PPP1R3D	1.24636	7.99213	6.75209	2.0104e-10	1.06849e-08	13.3628
PCOLCE2	1.24246	4.44112	3.66139	0.000330967	0.00201375	-0.292834
TSHZ3	1.24112	7.17576	6.63876	3.73118e-10	1.81348e-08	12.7654
P2RX1	1.24022	8.40154	6.74008	2.14715e-10	1.11794e-08	13.2992
LINC00266-1	1.23716	5.84411	5.87561	2.04373e-08	5.22083e-07	8.90736
BCAT1	1.23657	5.97747	6.40158	1.33509e-09	5.20353e-08	11.5349
G6PD	1.23239	8.07516	6.00361	1.06594e-08	2.97157e-07	9.53336
MTF1	1.23114	7.93778	7.78502	5.60151e-13	8.55359e-11	19.0594
CLEC4E	1.22672	8.29048	5.22344	4.8924e-07	7.68291e-06	5.8633
CDC42EP3	1.22503	9.32837	6.89394	9.19695e-11	5.45473e-09	14.1188
ZNF438	1.21888	6.76712	7.39145	5.53727e-12	5.5541e-10	16.8386
MCTP1	1.21735	7.74118	6.78358	1.69133e-10	9.22581e-09	13.5298
ECHDC3	1.21392	7.31804	4.95399	1.68885e-06	2.19411e-05	4.68129
VSTM1	1.21356	6.10288	5.16999	6.27757e-07	9.50789e-06	5.62516
TP53I3	1.21032	6.70872	6.3927	1.39963e-09	5.41383e-08	11.4893
S100A11	1.20925	11.9471	7.31243	8.7098e-12	8.12832e-10	16.3998
MGST1	1.20724	6.56186	7.87425	3.30654e-13	5.50899e-11	19.5707
SIRPA	1.20575	7.39076	6.85409	1.14669e-10	6.57276e-09	13.9055
PFKFB2	1.20197	6.01398	6.30806	2.1908e-09	7.79621e-08	11.0572
GK3P	1.20195	6.63495	5.18099	5.96441e-07	9.10096e-06	5.67403
HIST1H2BC	1.19579	7.08064	4.42209	1.70173e-05	0.000157275	2.48918
DSC2	1.19522	6.87449	5.37033	2.44442e-07	4.26773e-06	6.52684
KCNE1	1.19066	5.04653	5.94976	1.4032e-08	3.72105e-07	9.26891
NRN1	1.18972	4.78553	4.69811	5.25126e-06	5.74606e-05	3.60264
ABHD2	1.18514	7.57541	5.60299	7.93691e-08	1.67428e-06	7.60457
EMR1	1.18404	8.86138	4.42763	1.66286e-05	0.000153891	2.51101
TPST1	1.18188	6.33409	4.79186	3.48227e-06	4.06238e-05	3.99278
FGR	1.1797	10.5301	6.90068	8.85958e-11	5.28527e-09	14.1549
CCNA1	1.17944	5.40702	4.28491	2.99496e-05	0.000255879	1.95577
MSRB1	1.17858	11.662	7.5512	2.1999e-12	2.57225e-10	17.7331
IMPA2	1.17659	8.95184	5.14429	7.0727e-07	1.05023e-05	5.51129
FES	1.17269	7.68068	6.5142	7.31205e-10	3.1632e-08	12.1158
H2BFS	1.17107	8.56233	5.50628	1.27163e-07	2.46403e-06	7.15268
ERLIN1	1.17105	6.96758	5.67474	5.5756e-08	1.22543e-06	7.94337
NFE4	1.16598	6.88976	5.42481	1.88359e-07	3.41987e-06	6.77634
CCR1	1.16559	9.49373	5.17899	6.02039e-07	9.16587e-06	5.66511
RAB27A	1.16429	9.28653	5.95758	1.34841e-08	3.61142e-07	9.30722
CD55	1.16419	10.6332	6.07914	7.23064e-09	2.12883e-07	9.90689
SPTLC2	1.16235	7.04662	6.8931	9.23991e-11	5.46437e-09	14.1143
HIST2H2BE	1.16051	8.10435	5.32532	3.02766e-07	5.11576e-06	6.32211
SH3GLB1	1.15939	9.53545	6.8855	9.63772e-11	5.6832e-09	14.0735
MARCKS	1.15856	8.49587	6.3654	1.61787e-09	6.06317e-08	11.3496
HIST1H2BE	1.15832	6.70819	7.01238	4.7549e-11	3.26493e-09	14.7568
FPR1	1.14915	10.3769	5.84179	2.42363e-08	6.04785e-07	8.74349
TSPAN2	1.14756	6.35551	5.06061	1.03994e-06	1.45053e-05	5.14344
CPD	1.13783	7.47689	6.47246	9.14633e-10	3.81943e-08	11.8998
SLC51A	1.13779	5.74347	4.47046	1.38997e-05	0.000132286	2.68045
PLXNC1	1.13746	8.30693	6.77972	1.72755e-10	9.35164e-09	13.5093
RARA-AS1	1.13659	8.14101	7.66429	1.13794e-12	1.4926e-10	18.3721
CTSA	1.13643	9.73313	5.76663	3.53252e-08	8.26734e-07	8.38154
CAMP	1.12816	7.99729	4.94239	1.77957e-06	2.29016e-05	4.63145
VMP1	1.12652	7.63455	4.91068	2.0524e-06	2.5733e-05	4.49564
TBXAS1	1.12614	7.71058	5.89248	1.87661e-08	4.84227e-07	8.98937
ANO10	1.1237	6.97096	8.51255	7.06542e-15	2.23262e-12	23.3041
DHRS13	1.12322	7.9768	7.19148	1.73408e-11	1.39696e-09	15.733
ALOX5	1.12115	8.30689	6.99786	5.15709e-11	3.45982e-09	14.6783
RTN3	1.11956	9.78989	6.50693	7.60328e-10	3.26845e-08	12.0781
GK	1.11676	7.42543	5.16678	6.37213e-07	9.61552e-06	5.61088
C1QC	1.11238	5.81655	4.13121	5.55593e-05	0.000436915	1.37434
NLRP12	1.1109	7.88589	5.7415	4.00406e-08	9.16026e-07	8.26121
CD59	1.1098	7.39556	7.1999	1.6532e-11	1.34484e-09	15.7793
HIST1H2BH	1.10871	6.96575	6.5148	7.28852e-10	3.1597e-08	12.1189
JUNB	1.10346	7.55833	6.43263	1.13158e-09	4.54009e-08	11.6944
CKLF	1.10274	9.81179	6.31495	2.11264e-09	7.584e-08	11.0923
TMEM120A	1.10252	8.45118	6.50386	7.72988e-10	3.30206e-08	12.0621
GGH	1.10239	6.00031	4.51185	1.16752e-05	0.000114087	2.84543
MEGF9	1.10023	8.86954	5.98971	1.14452e-08	3.15197e-07	9.46493
CAPG	1.0998	9.11976	5.71413	4.58762e-08	1.03726e-06	8.13058
IGSF6	1.09895	8.12222	5.57398	9.14736e-08	1.88114e-06	7.46845
PLP2	1.09847	11.2874	6.3624	1.64385e-09	6.14927e-08	11.3342
HGF	1.09683	5.26218	5.53129	1.12625e-07	2.22016e-06	7.26903
HIST1H4H	1.09678	5.55551	5.45756	1.60911e-07	2.99803e-06	6.92717
CNIH4	1.09364	7.82551	7.28789	1.00209e-11	9.23537e-10	16.264
PIK3AP1	1.09288	8.71615	4.94092	1.79142e-06	2.29898e-05	4.62513
CEBPA	1.09187	8.21799	6.87919	9.98024e-11	5.82954e-09	14.0397
GPR160	1.09072	8.98689	4.99077	1.42989e-06	1.89008e-05	4.83986
IL17RA	1.09056	8.97062	7.00158	5.051e-11	3.41101e-09	14.6984
MIR646HG	1.09029	6.2289	5.53573	1.10218e-07	2.18323e-06	7.28974
HPGD	1.08604	6.91674	2.88837	0.00435564	0.0179826	-2.65289
EXOSC4	1.08046	7.72446	5.92455	1.59506e-08	4.19513e-07	9.14567
CSF3R	1.07953	10.748	4.91969	1.97094e-06	2.48947e-05	4.53419
WSB1	1.07869	8.40309	5.90159	1.79203e-08	4.64158e-07	9.03371
ZAK	1.0758	6.12507	7.313	8.68139e-12	8.12832e-10	16.403
PTX3	1.07436	4.27963	4.45212	1.50112e-05	0.000141418	2.60772
DOK3	1.07385	8.8543	6.7709	1.81327e-10	9.78977e-09	13.4625
CCPG1	1.07354	7.99459	5.02789	1.20768e-06	1.63869e-05	5.00085
LINC01000	1.07307	8.36029	5.84031	2.44175e-08	6.07085e-07	8.73633
ASPH	1.07213	5.42463	6.50459	7.6996e-10	3.29601e-08	12.0659
DPY19L3	1.07021	7.62239	4.40084	1.85899e-05	0.000170196	2.40568
SHKBP1	1.06842	8.56893	6.24538	3.04611e-09	1.0458e-07	10.7395
RAB32	1.06517	7.67967	7.76664	6.24155e-13	9.32223e-11	18.9545
CD300LF	1.05867	9.26389	5.07964	9.53006e-07	1.34393e-05	5.2267
SLA	1.05724	11.0552	6.39766	1.36321e-09	5.28294e-08	11.5147
FAR2	1.05568	6.24849	6.34545	1.7982e-09	6.59403e-08	11.2477
HTATSF1P2	1.05543	4.8186	3.82107	0.000183722	0.0012053	0.254801
HIP1	1.05381	5.73938	6.31752	2.08422e-09	7.52157e-08	11.1053
C9orf84	1.05251	4.46337	6.20959	3.67361e-09	1.21976e-07	10.5591
KREMEN1	1.05251	5.59928	7.08204	3.21702e-11	2.34707e-09	15.1349
ARL4A	1.05173	7.92648	5.47544	1.47621e-07	2.79626e-06	7.00975
SIRPB2	1.05028	7.39935	4.97537	1.53328e-06	2.01502e-05	4.77334
DDAH2	1.04971	7.81425	6.17676	4.3597e-09	1.40929e-07	10.3941
LOC731424	1.04954	6.52568	5.70034	4.91219e-08	1.09971e-06	8.06496
LILRA2	1.04713	8.63023	5.23932	4.54176e-07	7.20974e-06	5.93437
IL10RB	1.04523	9.26487	5.55106	1.02295e-07	2.04609e-06	7.36126
CFLAR	1.04495	8.45119	6.59803	4.65292e-10	2.1988e-08	12.5522
AGFG1	1.0434	7.45116	6.61442	4.25791e-10	2.05484e-08	12.6378
ENTPD7	1.04293	6.03679	5.65273	6.21554e-08	1.34442e-06	7.8391
LILRB3	1.04252	9.57476	6.69769	2.7072e-10	1.35439e-08	13.0753
CEP55	1.04247	4.95613	3.38635	0.000872496	0.00457535	-1.18875
APMAP	1.04129	10.5791	6.02325	9.63916e-09	2.72426e-07	9.63017
ROPN1L	1.03905	6.67061	7.3734	6.14225e-12	6.07163e-10	16.7381
IGF2R	1.03828	8.36713	5.02914	1.20081e-06	1.63154e-05	5.00628
SLC16A6	1.03785	7.23037	5.16002	6.57515e-07	9.84924e-06	5.58093
KLHL2	1.03768	9.00253	3.94181	0.000116281	0.000817483	0.681992
SMPDL3A	1.03588	5.22832	5.8523	2.29867e-08	5.79252e-07	8.79437
PRAM1	1.03519	7.68019	5.4723	1.49876e-07	2.82911e-06	6.99522
GCLM	1.03394	6.56444	5.50879	1.25623e-07	2.4388e-06	7.16435
HK2	1.02635	7.99889	7.14696	2.23104e-11	1.71622e-09	15.4891
CTSG	1.01772	6.4103	3.30553	0.00114752	0.00580627	-1.44042
FAM132B	1.01697	5.55769	3.21355	0.00155784	0.00755142	-1.72027
IER3	1.01485	8.69766	5.56224	9.68682e-08	1.96055e-06	7.41351
FAM126B	1.01192	7.37959	4.59913	8.05174e-06	8.29999e-05	3.19729
GLIPR2	1.01181	9.86153	6.41487	1.24393e-09	4.91832e-08	11.6031
VNN2	1.0088	11.191	3.90237	0.000135177	0.000930061	0.541217
NUMB	1.00858	6.7689	4.33495	2.44053e-05	0.000215344	2.14878
CSF2RA	1.00629	7.13475	6.55055	6.01297e-10	2.74025e-08	12.3046
ITGA7	1.00597	6.09982	3.93605	0.000118877	0.000833894	0.661336
RNF24	1.00369	7.86032	6.76093	1.91529e-10	1.02862e-08	13.4096
NPL	1.00104	8.09325	7.28712	1.00649e-11	9.23537e-10	16.2598
SLC22A15	0.999095	7.15545	5.03913	1.14732e-06	1.57168e-05	5.04973
NSUN7	0.995115	4.85732	7.1673	1.98861e-11	1.55309e-09	15.6004
EMILIN2	0.990807	6.52798	6.41322	1.25493e-09	4.94765e-08	11.5946
ATP6V1C1	0.987818	7.10923	5.46457	1.55571e-07	2.92045e-06	6.9595
GBAP1	0.987132	7.98261	5.87028	2.09947e-08	5.33656e-07	8.88149
C10orf54	0.986898	9.9592	5.24425	4.43783e-07	7.06119e-06	5.95649
DDIAS	0.9859	6.79119	5.49184	1.36372e-07	2.61523e-06	7.08568
EMR2	0.985897	6.78818	6.57435	5.28851e-10	2.44274e-08	12.4285
PIK3CB	0.983273	7.16296	5.87108	2.09097e-08	5.32157e-07	8.88539
ETS2	0.98288	6.18718	6.80388	1.51265e-10	8.41081e-09	13.6377
RALB	0.981872	9.19807	5.43191	1.82052e-07	3.32305e-06	6.80895
KDM6B	0.979847	7.95157	6.48629	8.4933e-10	3.57593e-08	11.9712
CEACAM4	0.978162	8.17604	7.51879	2.65498e-12	2.98495e-10	17.5508
PLEKHO2	0.969925	8.93645	6.92419	7.77546e-11	4.72111e-09	14.2811
CEBPB	0.967781	12.22	6.01359	1.01285e-08	2.83904e-07	9.58252
POR	0.967683	7.17385	5.24149	4.49577e-07	7.14228e-06	5.9441
ATP11B	0.967152	7.10514	5.98191	1.19104e-08	3.25381e-07	9.4266
RHOG	0.963158	11.1135	6.38604	1.45006e-09	5.51544e-08	11.4552
LPCAT2	0.961843	6.64598	5.69071	5.15226e-08	1.14469e-06	8.01916
KIAA0930	0.961474	7.73162	6.57485	5.27414e-10	2.44274e-08	12.4312
NFE2	0.958877	10.2451	5.44592	1.7019e-07	3.13961e-06	6.87347
SRPK1	0.958579	8.48264	7.6249	1.43238e-12	1.79812e-10	18.149
VIM	0.958327	9.08536	5.13719	7.30917e-07	1.0752e-05	5.47989
MAN1A1	0.957995	7.59584	4.94514	1.75764e-06	2.26622e-05	4.64326
ATP6V0D1	0.956152	10.569	5.8797	2.00189e-08	5.12675e-07	8.92724
IL1R1	0.956146	5.45423	5.90379	1.77219e-08	4.60769e-07	9.04441
CXCR1	0.955666	9.95385	4.69853	5.24155e-06	5.7395e-05	3.6044
AKIRIN2	0.955292	7.37976	6.0201	9.79607e-09	2.76098e-07	9.61463
MINOS1P1	0.951967	5.44267	4.63681	6.84791e-06	7.24519e-05	3.3508
DIRC2	0.950433	6.49241	6.53209	6.64174e-10	2.94163e-08	12.2086
EIF4E3	0.949762	7.60988	4.86125	2.56e-06	3.11247e-05	4.28533
TLR1	0.946977	9.10213	4.12202	5.76201e-05	0.000451541	1.34013
CHPT1	0.939828	7.55116	6.25662	2.8717e-09	9.92579e-08	10.7964
SIRPB1	0.938921	6.76015	7.39699	5.36362e-12	5.40642e-10	16.8694
CD93	0.937501	9.32007	4.50878	1.18276e-05	0.000115411	2.83315
SERPINA1	0.937151	8.05294	8.0306	1.30439e-13	2.44867e-11	20.4732
MMRN1	0.936533	4.45286	2.80817	0.0055416	0.0219497	-2.86906
NABP1	0.936446	7.96595	3.91032	0.000131147	0.000906595	0.569508
SOCS3	0.936403	6.31886	7.0764	3.32066e-11	2.40096e-09	15.1042
ATP9A	0.935447	5.90177	5.56126	9.73308e-08	1.96797e-06	7.40894
DENND3	0.934453	7.66049	5.64382	6.4943e-08	1.3988e-06	7.79701
C8orf88	0.934103	6.13924	5.52586	1.15638e-07	2.26864e-06	7.24373
PPP1R3B	0.932323	6.54463	6.3892	1.4259e-09	5.48849e-08	11.4714
VPS9D1	0.931727	6.79838	5.27665	3.81064e-07	6.21302e-06	6.10214
IL1RN	0.930163	6.62429	7.20606	1.59646e-11	1.31192e-09	15.8131
GCA	0.930061	11.0435	4.7984	3.38326e-06	3.96042e-05	4.0202
GNA15	0.928101	7.58054	6.18286	4.22335e-09	1.36954e-07	10.4247
PKM	0.927784	8.19373	6.00215	1.07394e-08	2.98573e-07	9.52617
ARRB2	0.926642	10.2719	6.14874	5.0435e-09	1.58769e-07	10.2538
KCNJ2	0.926597	10.2181	4.3949	1.90544e-05	0.000173748	2.38238
APOBR	0.925637	7.78817	5.33422	2.90246e-07	4.94918e-06	6.36251
GSR	0.923021	7.22859	6.52278	6.98262e-10	3.04645e-08	12.1603
CD58	0.922412	6.7645	5.28557	3.65384e-07	6.00521e-06	6.14232
STX11	0.921243	7.80669	4.03244	8.19237e-05	0.00060935	1.00992
CLEC1B	0.919354	6.75703	3.50925	0.000569778	0.00319685	-0.79592
CORO2A	0.918664	5.92425	5.52971	1.13494e-07	2.23299e-06	7.26167
CD274	0.916905	6.93349	3.7106	0.000276609	0.0017256	-0.12617
LHFPL2	0.916837	7.00104	6.36133	1.6532e-09	6.1617e-08	11.3287
ANP32A-IT1	0.916254	5.54662	4.3607	2.19511e-05	0.000196312	2.24878
ANKS1A	0.915534	7.4518	4.69505	5.32155e-06	5.81054e-05	3.59003
ADAM9	0.914537	5.15175	6.20361	3.79003e-09	1.24481e-07	10.529
PYCARD	0.913509	10.1443	4.55366	9.7777e-06	9.82668e-05	3.01332
YIPF1	0.912051	8.10342	6.15276	4.93924e-09	1.55967e-07	10.2739
SLC40A1	0.911239	8.34339	5.63055	6.9325e-08	1.48382e-06	7.73436
FOSL2	0.90701	6.97079	6.37198	1.56238e-09	5.88757e-08	11.3832
IQGAP1	0.906731	9.87146	5.02928	1.20004e-06	1.63154e-05	5.00689
DUSP3	0.904177	6.99238	7.46108	3.70746e-12	4.03521e-10	17.2272
STEAP4	0.903274	7.67186	4.15971	4.96055e-05	0.000395568	1.48085
LGALS1	0.903146	11.5394	4.54381	1.01959e-05	0.000101671	2.97366
ASAP1	0.902624	8.7641	6.84694	1.19294e-10	6.79942e-09	13.8673
TLR4	0.902119	7.68271	3.8601	0.000158656	0.00106649	0.391653
TECPR2	0.901404	7.16401	4.88597	2.29255e-06	2.82861e-05	4.39032
H1F0	0.900979	6.69296	4.88488	2.30376e-06	2.83973e-05	4.38568
HYMAI	0.900768	5.75044	4.95038	1.7166e-06	2.2203e-05	4.66576
FTX	0.899405	6.68878	3.85902	0.000159302	0.00106979	0.387855
MLKL	0.898524	8.96394	4.87954	2.35947e-06	2.89967e-05	4.36294
CHIT1	0.898484	5.4144	3.64931	0.000345776	0.00209514	-0.33346
LACTB	0.898027	6.68772	4.52819	1.08949e-05	0.000107385	2.91089
NME8	0.897663	6.28611	4.57599	8.8899e-06	9.0455e-05	3.10347
SNX27	0.897175	8.23906	7.32133	8.27778e-12	7.87814e-10	16.4491
F8	0.895535	6.3778	5.07063	9.9322e-07	1.39391e-05	5.18728
DNTTIP1	0.892444	7.787	5.18197	5.93725e-07	9.06627e-06	5.67839
CHMP2A	0.891049	9.15763	5.22751	4.80019e-07	7.56714e-06	5.88148
NAMPT	0.889765	10.9927	4.09508	6.40897e-05	0.000494496	1.24021
KCNE3	0.887886	7.41285	4.79248	3.47275e-06	4.0559e-05	3.99538
PDGFC	0.887166	5.7338	4.1409	5.34626e-05	0.000422702	1.41048
BLOC1S1	0.88645	9.41813	5.158	6.6371e-07	9.91662e-06	5.57198
SIGLEC10	0.885699	7.28579	3.42578	0.000761966	0.0040783	-1.06406
VASP	0.884905	9.53529	6.03773	8.94846e-09	2.5431e-07	9.70172
LOC645984	0.882854	4.5183	5.09998	8.67912e-07	1.24626e-05	5.31594
SLC11A1	0.882226	7.22251	6.88036	9.91576e-11	5.81365e-09	14.046
UHRF1	0.88187	5.1951	3.51839	0.000551751	0.00311275	-0.766215
ANXA1	0.878149	8.70981	3.79687	0.000201103	0.00130717	0.170542
LMO2	0.875769	7.47876	4.40743	1.80883e-05	0.000165974	2.43152
MICU1	0.875208	8.03572	5.77945	3.31346e-08	7.85631e-07	8.44303
GRAMD1A	0.873897	7.43604	5.97619	1.22633e-08	3.32359e-07	9.39851
VCAN	0.872914	10.1608	3.37193	0.000916556	0.00478922	-1.23406
EXOC6	0.872516	6.42076	5.99849	1.09425e-08	3.02983e-07	9.50814
ALPK1	0.872287	7.18999	5.86155	2.19398e-08	5.54236e-07	8.83917
IFITM3	0.871668	12.5916	6.35594	1.70104e-09	6.27148e-08	11.3012
GRINA	0.870668	8.52308	4.79877	3.37776e-06	3.95625e-05	4.02174
LILRB2	0.869514	8.59747	4.34307	2.36041e-05	0.000208995	2.18027
FKBP9	0.869388	6.09186	6.9755	5.84301e-11	3.7716e-09	14.5575
HLX	0.868671	7.65165	5.17683	6.08122e-07	9.24667e-06	5.65551
PADI2	0.867619	6.2492	6.51256	7.37698e-10	3.18455e-08	12.1072
FRAT2	0.865114	10.1181	4.3049	2.76035e-05	0.000238926	2.03266
FNDC3B	0.863738	4.83265	5.18534	5.84494e-07	8.95203e-06	5.69336
CRISPLD2	0.863292	7.46005	7.55194	2.19048e-12	2.57225e-10	17.7372
TMEM260	0.861549	8.02929	4.62742	7.13065e-06	7.48243e-05	3.31244
PLXDC2	0.859948	6.25035	4.62819	7.10706e-06	7.46151e-05	3.31558
FAM53C	0.859941	9.07961	5.53823	1.0889e-07	2.16112e-06	7.30136
ENTPD1	0.858088	7.46747	4.88589	2.29336e-06	2.82861e-05	4.38999
JAK2	0.855461	6.87656	4.71703	4.83572e-06	5.36016e-05	3.6809
IFNGR1	0.854333	9.84101	4.65579	6.30901e-06	6.73422e-05	3.42853
LOC643072	0.853691	6.64145	4.43173	1.63465e-05	0.000151723	2.52718
PSENEN	0.853344	8.31677	5.01446	1.28392e-06	1.73296e-05	4.94248
MTMR3	0.852858	7.2389	7.57075	1.96366e-12	2.34973e-10	17.8432
FAM160A2	0.852831	7.69209	6.47171	9.18337e-10	3.82709e-08	11.8959
SLC37A3	0.852433	6.93727	4.20137	4.19889e-05	0.000341893	1.63761
SNORD89	0.849255	8.23704	4.5896	8.38736e-06	8.58761e-05	3.1586
SERPINB10	0.848665	5.31002	3.62624	0.000375796	0.00224578	-0.410689
STXBP2	0.846087	7.943	7.52664	2.53686e-12	2.89995e-10	17.5949
PPM1M	0.84577	9.01698	4.74293	4.3179e-06	4.86483e-05	3.78844
CD97	0.845088	9.83304	4.16457	4.86532e-05	0.000388883	1.49907
PHF21A	0.844502	7.19876	6.16789	4.56565e-09	1.4666e-07	10.3496
PRC1	0.843746	5.30174	3.34414	0.00100736	0.00518032	-1.32086
MBOAT2	0.843056	7.49815	6.70744	2.56683e-10	1.29597e-08	13.1267
ADCY3	0.84297	5.99706	5.00197	1.35897e-06	1.8151e-05	4.88834
GALNT2	0.841976	6.79798	4.64171	6.70453e-06	7.11556e-05	3.37087
GNG5	0.84164	11.3328	6.08792	6.91046e-09	2.05526e-07	9.95049
MTX1	0.841183	9.01508	6.84219	1.22464e-10	6.96074e-09	13.8419
CPQ	0.840015	7.60616	4.89449	2.20687e-06	2.73844e-05	4.42657
PLOD1	0.839986	7.3386	6.83922	1.2449e-10	7.05629e-09	13.826
LRRC4	0.839548	7.14181	5.90495	1.76176e-08	4.59224e-07	9.05009
NTNG2	0.839221	6.63245	5.05947	1.04539e-06	1.45714e-05	5.13845
ATXN1	0.838774	6.9554	6.61174	4.32018e-10	2.07999e-08	12.6238
KBTBD7	0.837926	6.70824	3.1765	0.00175878	0.00836545	-1.83103
ABHD5	0.83729	6.24267	5.43854	1.76339e-07	3.2332e-06	6.83948
ACSL4	0.836959	5.8226	5.07647	9.66959e-07	1.36079e-05	5.21284
ARL8A	0.83685	7.42845	6.42278	1.19257e-09	4.7509e-08	11.6437
BPGM	0.836647	7.73015	1.99704	0.0473523	0.124773	-4.73561
BAZ1A	0.834186	9.56312	3.97308	0.000103113	0.000738757	0.794449
LYN	0.833637	11.2302	5.2953	3.48972e-07	5.76324e-06	6.18627
LOC100506119	0.833142	7.02962	5.64355	6.50304e-08	1.39921e-06	7.79572
MAFB	0.832994	8.9866	4.08889	6.56733e-05	0.00050538	1.2173
SMAD1	0.832035	5.29932	4.12193	5.76398e-05	0.000451541	1.33981
HN1	0.830201	8.46012	5.44542	1.706e-07	3.14206e-06	6.87117
HDAC4	0.82872	6.90855	6.95112	6.69354e-11	4.21564e-09	14.426
LINC01270	0.8263	5.09203	5.37689	2.36905e-07	4.15743e-06	6.55682
MSRB2	0.824954	7.12955	5.25585	4.2025e-07	6.71285e-06	6.00857
TGFB1I1	0.824531	5.12152	2.89297	0.00429517	0.0177983	-2.64031
STX3	0.823459	7.5942	4.4626	1.43661e-05	0.000136217	2.64925
GNB2	0.821413	9.67785	6.04281	8.71808e-09	2.49024e-07	9.72683
LILRB1	0.820831	8.52578	5.97938	1.20652e-08	3.27955e-07	9.41418
NDUFB3	0.82083	8.17409	4.57101	9.08093e-06	9.22612e-05	3.08333
KLHL8	0.819248	7.53321	4.49204	1.26932e-05	0.000122629	2.76633
DNASE1L1	0.819037	8.4501	5.45334	1.64219e-07	3.04646e-06	6.90768
COL4A3BP	0.818805	8.9481	4.59227	8.29203e-06	8.50484e-05	3.16943
HIST1H2BK	0.817708	11.2353	5.45553	1.62498e-07	3.02275e-06	6.91777
PDZD8	0.816948	5.85426	4.99593	1.39674e-06	1.85224e-05	4.86221
MAP1LC3B	0.815298	9.78821	6.41469	1.24508e-09	4.91832e-08	11.6022
TMEM45A	0.813849	4.15595	3.3337	0.00104358	0.00533711	-1.3533
RALGAPA2	0.810903	6.35189	7.24559	1.27521e-11	1.09636e-09	16.0306
BASP1	0.80996	8.70486	7.64902	1.24423e-12	1.59122e-10	18.2855
GAPDH	0.808388	12.5788	5.69073	5.15177e-08	1.14469e-06	8.01925
PAM	0.807717	6.73334	4.74405	4.2969e-06	4.84425e-05	3.79307
TPD52L2	0.806897	9.26581	5.3971	2.1511e-07	3.8175e-06	6.6492
PNPLA1	0.805643	4.14466	6.40033	1.34398e-09	5.22823e-08	11.5284
TM6SF1	0.805104	7.56808	3.67081	0.000319843	0.00195888	-0.261093
CLIC2	0.803667	5.63324	2.23211	0.0268612	0.0795092	-4.25567
CPNE3	0.802541	9.05332	4.07992	6.80311e-05	0.000520977	1.1842
NARF	0.801968	7.07289	6.24023	3.12944e-09	1.06724e-07	10.7135
TLE3	0.800779	7.32669	4.99768	1.38572e-06	1.8412e-05	4.86976
APLP2	0.800528	8.2268	6.10557	6.30819e-09	1.92081e-07	10.0383
LDHA	0.799831	11.7615	4.44727	1.53191e-05	0.000143723	2.58853
HIST1H4D	0.799788	5.06528	4.63683	6.84711e-06	7.24519e-05	3.35091
P2RY13	0.799435	10.6216	4.04993	7.65186e-05	0.000575408	1.07391
MXD1	0.797053	9.28479	5.05169	1.08328e-06	1.50075e-05	5.10449
EFHD2	0.796424	9.09678	4.41837	1.72834e-05	0.000159519	2.47452
UBE2S	0.795801	7.59292	4.18345	4.51176e-05	0.000363893	1.57001
NEU1	0.795709	7.30255	5.06839	1.0035e-06	1.40737e-05	5.17746
RBPJ	0.795703	8.84998	5.35453	2.63543e-07	4.56229e-06	6.45484
TMUB2	0.795284	7.09073	7.27585	1.07333e-11	9.6327e-10	16.1975
ZNF106	0.794605	8.71524	5.6504	6.28712e-08	1.35847e-06	7.82811
ZNF516	0.792862	6.77057	4.60094	7.98942e-06	8.24821e-05	3.20466
TYROBP	0.791959	11.8008	4.20171	4.19319e-05	0.000341727	1.63889
CAPN3	0.790969	6.05629	4.44758	1.52991e-05	0.000143601	2.58976
IFITM2	0.790538	13.3751	6.11616	5.97186e-09	1.83164e-07	10.091
BATF2	0.790532	5.86336	3.23778	0.0014382	0.00706564	-1.64721
CAMKK2	0.789883	7.13669	7.12096	2.58375e-11	1.95087e-09	15.347
CFP	0.788567	9.3003	3.92596	0.000123553	0.000862549	0.625267
CTSB	0.788181	9.74961	5.94034	1.4721e-08	3.87672e-07	9.22281
MILR1	0.787504	6.28185	4.58204	8.66274e-06	8.83634e-05	3.12799
COLGALT1	0.786678	7.50871	6.94572	6.89793e-11	4.30322e-09	14.3969
IL6R	0.785805	8.20303	4.43268	1.62824e-05	0.000151372	2.53089
LOC102724587	0.784139	4.16717	4.19066	4.38323e-05	0.000354645	1.59719
LINC01094	0.783137	4.94608	3.90683	0.000132902	0.000917491	0.55708
RPS6KA1	0.782047	9.32747	4.82463	3.01255e-06	3.59015e-05	4.13052
RRM2	0.781111	7.11009	2.1959	0.0293985	0.0855693	-4.3329
B3GNT8	0.779935	6.95737	5.662	5.93777e-08	1.29391e-06	7.88297
JDP2	0.778445	5.92566	6.59038	4.84954e-10	2.28118e-08	12.5122
TKT	0.778418	8.96464	4.85456	2.63749e-06	3.18773e-05	4.25697
CSGALNACT2	0.778263	8.00037	3.66432	0.000327471	0.00199485	-0.282975
METRNL	0.778182	7.22001	4.46648	1.41338e-05	0.000134264	2.66466
SCPEP1	0.777745	7.27126	5.23883	4.5521e-07	7.22055e-06	5.9322
STAT5B	0.775393	8.55373	5.94149	1.46353e-08	3.86409e-07	9.22843
PGM1	0.774302	7.84626	4.5444	1.01704e-05	0.000101466	2.97603
NCF2	0.773021	11.1586	4.62657	7.1567e-06	7.50207e-05	3.30899
RIT1	0.772678	6.60788	4.27917	3.06571e-05	0.000260726	1.93377
UBAP1	0.76997	8.37634	7.09091	3.06031e-11	2.26884e-09	15.1832
SLC25A44	0.769826	7.79863	5.12991	7.5596e-07	1.10647e-05	5.44773
FEM1C	0.769323	7.27034	4.05697	7.44401e-05	0.000562271	1.09974
YOD1	0.767476	7.09862	2.51398	0.0128293	0.0438293	-3.61402
SNX3	0.76508	11.3139	5.87627	2.03684e-08	5.20973e-07	8.9106
REPS2	0.763297	6.20261	4.85497	2.63264e-06	3.18564e-05	4.25872
ASGR2	0.762886	7.74218	4.45187	1.50265e-05	0.000141497	2.60676
DNAJC5	0.7621	7.50933	5.79585	3.05243e-08	7.32224e-07	8.52185
CSTA	0.760414	10.7427	3.78167	0.000212807	0.00137408	0.11784
SLCO3A1	0.760139	7.44722	5.54457	1.05582e-07	2.10567e-06	7.33093
CARD16	0.759717	5.83568	5.16455	6.43834e-07	9.69399e-06	5.60101
SBF2	0.758942	6.19573	6.12342	5.75135e-09	1.7777e-07	10.1273
PXN	0.758901	7.40405	5.10861	8.34067e-07	1.20613e-05	5.35389
HMMR	0.757731	5.60139	3.27252	0.00128153	0.00639888	-1.54165
PCYT1A	0.757652	6.63631	5.21545	5.07888e-07	7.94527e-06	5.82756
CDKN3	0.756236	5.48833	3.34994	0.000987747	0.00509485	-1.3028
LOC100505812	0.756171	7.97122	3.99592	9.44069e-05	0.000685019	0.877037
CXCL16	0.754534	8.14333	4.4423	1.56407e-05	0.000146204	2.56889
HIST1H2AM	0.754254	4.96295	5.06689	1.01041e-06	1.41416e-05	5.17091
ADAMTS3	0.753486	3.85369	3.32473	0.00107569	0.00548215	-1.38112
THEMIS2	0.75281	9.65782	4.06298	7.27068e-05	0.000551044	1.12184
TBC1D2	0.752111	6.05777	6.07539	7.37214e-09	2.16116e-07	9.88824
CUX1	0.750597	7.12814	5.55535	1.0018e-07	2.01167e-06	7.38128
PLA2G4A	0.748148	4.47471	3.48149	0.000627981	0.00347196	-0.885732
C1RL	0.746487	6.98836	6.15149	4.97211e-09	1.56763e-07	10.2675
APBB1IP	0.746324	8.43328	4.75659	4.06702e-06	4.62587e-05	3.84529
CASP5	0.746079	6.48319	3.30862	0.00113564	0.00575612	-1.43088
GPR27	0.745701	7.70802	5.34891	2.70683e-07	4.66615e-06	6.42927
TPST2	0.745398	9.63781	5.01156	1.30097e-06	1.75249e-05	4.92991
PIM3	0.745224	9.25326	4.95473	1.68324e-06	2.18821e-05	4.68445
ACSS2	0.742755	7.17689	7.14488	2.25741e-11	1.72355e-09	15.4777
GDE1	0.741863	8.41854	6.01531	1.00395e-08	2.8191e-07	9.59101
NFKBIZ	0.741463	10.1124	4.10177	6.24221e-05	0.000484186	1.26496
SELP	0.741453	7.46314	3.24969	0.00138258	0.00683509	-1.61113
IL1B	0.740208	8.27247	3.72082	0.00026644	0.00167236	-0.0913444
PNPLA6	0.739109	8.56168	5.13727	7.30628e-07	1.0752e-05	5.48027
IRF2BPL	0.738699	9.6422	3.51791	0.000552683	0.00311715	-0.767774
EHD1	0.738417	8.51778	5.39766	2.14534e-07	3.81058e-06	6.65176
STAT3	0.737582	8.4572	6.67364	3.08637e-10	1.53285e-08	12.9486
CA2	0.737196	7.17422	1.97404	0.0499325	0.130172	-4.77984
PPP4C	0.734803	9.17918	4.63332	6.95152e-06	7.33206e-05	3.33657
C1orf162	0.734182	10.0491	3.83952	0.000171434	0.00113707	0.319369
TIPARP	0.73322	8.21805	3.683	0.000305961	0.00188075	-0.219885
PIWIL4	0.732971	5.18245	4.9271	1.90644e-06	2.42597e-05	4.56587
FOS	0.731523	8.23551	3.24166	0.00141987	0.00698565	-1.63548
ALAS1	0.73025	7.41397	4.38325	1.99975e-05	0.000181057	2.33676
CDK5RAP2	0.730101	6.68526	5.60053	8.03324e-08	1.69111e-06	7.593
TBC1D8	0.729654	6.50225	5.49395	1.34982e-07	2.59343e-06	7.0955
GBE1	0.729347	8.26915	3.76218	0.000228757	0.00146505	0.0505366
FLVCR2	0.727832	6.65966	5.45975	1.59225e-07	2.98084e-06	6.93726
ENO1	0.727828	7.47249	6.18712	4.13059e-09	1.34159e-07	10.4461
KL	0.727525	3.35219	4.34708	2.32177e-05	0.000206019	2.19585
FAR1	0.726448	7.71416	3.33811	0.00102814	0.00527264	-1.33961
ACOX1	0.725621	6.18085	6.40737	1.29458e-09	5.0844e-08	11.5646
RAB3D	0.725339	7.4754	6.58059	5.11331e-10	2.38334e-08	12.4611
CDC123	0.72499	8.71901	3.83226	0.000176177	0.00116139	0.293908
TOM1	0.724905	6.92433	5.77626	3.36672e-08	7.9541e-07	8.42771
IMPDH1	0.724886	9.05766	6.03365	9.13805e-09	2.59338e-07	9.68155
TRPS1	0.724021	6.3325	4.75295	4.13244e-06	4.69246e-05	3.83014
IL10	0.722853	4.04488	6.49763	7.99229e-10	3.39291e-08	12.0299
ERO1L	0.721707	7.91664	4.62321	7.26073e-06	7.59944e-05	3.2953
C16orf72	0.721265	8.66673	3.94432	0.000115169	0.000811496	0.690979
CHSY1	0.721197	8.88963	3.63979	0.000357884	0.00215573	-0.365392
FIG4	0.720217	7.86725	3.86172	0.000157685	0.00106171	0.397383
VWA5A	0.719803	6.53034	4.39425	1.91062e-05	0.000174066	2.37982
CENPW	0.7195	5.71847	3.47694	0.000638015	0.00352078	-0.900362
RAB20	0.719285	6.7204	6.4541	1.00902e-09	4.12106e-08	11.805
PFKFB4	0.717054	7.42925	6.28818	2.43277e-09	8.59747e-08	10.9562
LINC01093	0.716668	3.47257	3.12292	0.00209206	0.00969819	-1.98915
VAMP3	0.716207	8.93477	4.15933	4.968e-05	0.000396008	1.47944
DTL	0.714573	4.92767	3.01424	0.00295436	0.0129893	-2.30249
RBMS1	0.713207	10.0679	5.13393	7.42009e-07	1.08995e-05	5.46552
MAFG	0.712644	6.85256	8.23572	3.804e-14	8.74578e-12	21.6693
EXT1	0.711872	5.20619	5.02951	1.1988e-06	1.63108e-05	5.00788
FAM105A	0.711214	6.30744	4.38634	1.97424e-05	0.000178985	2.34889
USP32	0.710723	8.17309	5.1641	6.45168e-07	9.70693e-06	5.59904
LPGAT1	0.710201	8.27411	3.83663	0.000173308	0.00114727	0.309227
B3GNT5	0.709077	5.38145	6.04567	8.59106e-09	2.46205e-07	9.74095
BRI3	0.708937	9.20933	6.33985	1.85222e-09	6.78e-08	11.2191
TREML3P	0.708295	5.04196	5.30856	3.27767e-07	5.46599e-06	6.24622
TTK	0.706416	4.5532	2.68692	0.00789833	0.029527	-3.18529
SMAP2	0.704259	10.4406	3.84301	0.000169201	0.00112473	0.331597
CYB5R3	0.70425	9.01099	5.26183	4.08612e-07	6.57313e-06	6.03542
TMEM45B	0.703014	5.49201	4.03411	8.13922e-05	0.000607163	1.01602
PHTF1	0.702261	5.53753	5.69001	5.17001e-08	1.14738e-06	8.01586
LRRC25	0.701811	8.61755	4.66679	6.0158e-06	6.47189e-05	3.47367
PCNX	0.701692	5.97591	4.69777	5.25894e-06	5.74831e-05	3.60126
PRKACA	0.701661	6.23348	6.29097	2.39726e-09	8.48664e-08	10.9704
LAIR1	0.699548	8.12944	4.09141	6.50231e-05	0.000500943	1.22664
ARID3A	0.699346	6.91851	5.97932	1.20687e-08	3.27955e-07	9.4139
LCP1	0.698453	11.8913	4.36472	2.15894e-05	0.000193755	2.26446
HSDL2	0.698193	6.68291	4.68998	5.44009e-06	5.92484e-05	3.56912
ATP6AP1	0.69779	8.94798	4.90894	2.06845e-06	2.59024e-05	4.48823
CD82	0.69758	7.7979	5.08261	9.40089e-07	1.32938e-05	5.23972
TCIRG1	0.697179	9.23005	3.97287	0.000103197	0.000739104	0.793682
ATP6V0B	0.697166	10.1998	5.33365	2.91033e-07	4.95433e-06	6.35992
FAM101B	0.697137	10.4802	3.26036	0.00133449	0.00661969	-1.57873
HIST1H1T	0.696848	6.07917	5.4113	2.00972e-07	3.61679e-06	6.71428
TPP1	0.696251	8.03585	6.02386	9.60877e-09	2.71943e-07	9.63321
KLF7	0.696022	6.9662	6.06828	7.64707e-09	2.23216e-07	9.85299
FRAT1	0.694793	9.50308	3.56492	0.000467997	0.00270055	-0.613956
PXK	0.693731	6.92353	5.03882	1.14892e-06	1.57168e-05	5.0484
C5orf30	0.693363	6.54115	3.09522	0.00228642	0.0104244	-2.06996
SIRPD	0.692104	6.79028	6.65501	3.41576e-10	1.6761e-08	12.8507
UBE2F	0.691708	8.33574	5.9034	1.7757e-08	4.61096e-07	9.04251
TMCO3	0.691616	5.32404	5.25651	4.18961e-07	6.69748e-06	6.01151
IL4R	0.691284	8.76172	4.19604	4.2898e-05	0.000348325	1.61746
SRA1	0.691233	8.41522	5.2347	4.64104e-07	7.35592e-06	5.9137
SMARCD3	0.690219	6.15443	6.12237	5.78291e-09	1.78208e-07	10.122
LOC441124	0.690131	7.4388	5.67763	5.4965e-08	1.21282e-06	7.95708
DHRS7B	0.688539	6.44971	5.3161	3.16287e-07	5.30915e-06	6.28032
XPO6	0.688336	10.3319	4.71823	4.81039e-06	5.33497e-05	3.68588
PGD	0.688197	7.6034	8.6377	3.277e-15	1.19739e-12	24.0504
CMTM4	0.687748	5.8146	6.33143	1.93661e-09	7.05107e-08	11.1761
PILRA	0.685946	8.30194	3.29706	0.0011806	0.00595156	-1.46648
CHIC2	0.685907	8.73097	4.00329	9.17504e-05	0.000668655	0.903771
RBM47	0.683875	6.70619	6.08639	6.96544e-09	2.06561e-07	9.94286
ZDHHC20	0.683648	7.50736	3.4889	0.000611909	0.00339319	-0.861801
TMEM180	0.683412	6.12432	5.81211	2.8134e-08	6.84515e-07	8.60019
CYP4F3	0.683191	8.12256	2.29156	0.0231083	0.0703424	-4.1263
CXCL1	0.682998	5.99769	3.92715	0.000122993	0.000858935	0.629512
IL1A	0.68159	5.30325	5.14691	6.98749e-07	1.03909e-05	5.52286
MYADM	0.680509	9.56062	4.03672	8.05671e-05	0.000601885	1.02557
KLF5	0.67941	4.88644	5.96147	1.32199e-08	3.55928e-07	9.32626
PAPSS1	0.677933	9.55037	3.84457	0.000168209	0.00111955	0.337083
TALDO1	0.677848	12.0153	5.40631	2.05832e-07	3.68448e-06	6.6914
TPX2	0.677008	5.52838	3.69144	0.000296685	0.00183352	-0.191285
LOC100996412	0.676569	8.62751	3.1586	0.0018642	0.00878793	-1.88411
MIAT	0.67645	7.36326	2.85645	0.00479666	0.0194586	-2.73958
SLC36A1	0.675661	6.8855	7.06593	3.52193e-11	2.53232e-09	15.0473
ZNF467	0.674986	6.70494	5.74761	3.8839e-08	8.94958e-07	8.29047
ARL11	0.674816	6.1668	5.83892	2.45893e-08	6.10395e-07	8.7296
RNF144B	0.674727	7.20962	4.83503	2.87665e-06	3.44424e-05	4.17441
SLC16A5	0.674705	6.47946	4.87347	2.42431e-06	2.974e-05	4.33715
SAT1	0.673362	11.5293	4.59602	8.15999e-06	8.40311e-05	3.18464
RASSF2	0.672873	10.4397	4.29607	2.86171e-05	0.000246241	1.99867
GSTO1	0.672095	10.2964	4.1587	4.98048e-05	0.000396848	1.47708
CEACAM21	0.671289	6.26988	3.86834	0.00015379	0.00104028	0.42073
HIPK1	0.669986	7.04295	5.91388	1.68385e-08	4.40599e-07	9.09358
SBNO2	0.669652	7.09059	4.18742	4.44062e-05	0.000358721	1.58496
APH1B	0.668865	7.26205	6.1381	5.33004e-09	1.66761e-07	10.2005
SLC7A5	0.668156	6.79694	2.91722	0.00398923	0.0166962	-2.57377
ARHGEF40	0.668153	6.25494	3.24233	0.00141675	0.00697331	-1.63347
CTNNA1	0.667825	6.37509	6.04537	8.60432e-09	2.4624e-07	9.73947
MYOF	0.667534	5.46589	3.19469	0.00165728	0.00796147	-1.77678
MAP3K5	0.667361	8.49918	4.04958	7.66206e-05	0.000575596	1.07266
IRS2	0.667285	8.95986	3.71523	0.000271957	0.00170021	-0.1104
ST6GALNAC2	0.66576	7.42204	3.89801	0.000137438	0.000943714	0.525718
PECR	0.665337	6.63221	5.12454	7.74948e-07	1.13103e-05	5.42406
MAP3K3	0.665026	6.91499	4.94019	1.79735e-06	2.30434e-05	4.62198
TNFRSF1A	0.664492	9.4844	4.08998	6.53911e-05	0.000503588	1.22134
AMPH	0.664192	5.31194	3.46808	0.000658045	0.00360796	-0.928884
NACC2	0.662808	6.80115	4.32183	2.57554e-05	0.000225602	2.098
GLA	0.661663	8.0379	5.616	7.44617e-08	1.58218e-06	7.66579
GNG10	0.661426	11.2106	3.74408	0.000244582	0.0015552	-0.0117218
CEACAM3	0.660863	7.22194	5.88703	1.92904e-08	4.95879e-07	8.96288
BCKDK	0.659496	7.0489	5.66172	5.94578e-08	1.29395e-06	7.88168
UBE2M	0.65943	8.0921	3.65315	0.000341003	0.00206928	-0.320561
FERMT3	0.658412	8.99308	4.48531	1.30583e-05	0.0001258	2.7395
RAB24	0.65792	9.40182	3.52918	0.000531161	0.0030132	-0.731062
ROGDI	0.657602	7.40849	4.27511	3.11688e-05	0.000264637	1.91817
KIF13A	0.655931	5.50686	6.42265	1.19341e-09	4.7509e-08	11.6431
MAN2A2	0.654892	7.48249	4.83207	2.91477e-06	3.48376e-05	4.1619
MVB12A	0.654398	5.93772	3.93058	0.00012139	0.00084919	0.641778
FLT3	0.654298	6.05817	4.20369	4.16004e-05	0.000339405	1.64636
NAPRT	0.653887	8.2298	4.88936	2.25812e-06	2.79019e-05	4.40472
PREX1	0.653836	9.21937	4.20197	4.18881e-05	0.000341616	1.63987
RNF19B	0.652842	7.59428	3.64141	0.000355791	0.00214565	-0.359951
HMOX1	0.652784	7.69909	3.40927	0.000806545	0.00428441	-1.11642
GTF2H2B	0.651897	5.70818	3.52223	0.000544347	0.00307776	-0.753728
TCF7L2	0.651182	7.02786	4.48391	1.31356e-05	0.000126405	2.73392
MEF2A	0.651004	6.77216	3.86705	0.000154543	0.00104365	0.416169
CSRNP1	0.649898	7.29553	5.36435	2.51504e-07	4.37237e-06	6.49959
SERINC3	0.649557	9.39003	6.47484	9.03087e-10	3.77893e-08	11.912
SOS2	0.64922	5.94936	5.74349	3.9645e-08	9.09436e-07	8.27074
ANXA5	0.64922	9.12623	3.35612	0.00096724	0.00500801	-1.28353
TYMP	0.648788	7.42963	3.76472	0.000226618	0.00145408	0.0592797
TRIM25	0.646129	8.9187	5.74641	3.90731e-08	8.99341e-07	8.2847
GM2A	0.645857	6.39007	5.20093	5.43521e-07	8.39361e-06	5.76278
OSTF1	0.645833	8.59321	3.89903	0.000136907	0.000941008	0.529341
UBXN2B	0.643974	8.08671	4.6128	7.59321e-06	7.90296e-05	3.25286
SLCO4C1	0.643332	5.10696	4.11952	5.81938e-05	0.000455184	1.33082
CLU	0.643152	6.3545	3.73449	0.000253379	0.00160413	-0.044598
KCNJ2-AS1	0.643119	3.66275	3.50116	0.000586196	0.00326921	-0.82216
RABAC1	0.642746	9.73935	4.3758	2.06233e-05	0.000185983	2.30767
TSEN34	0.642518	8.96282	3.89811	0.000137385	0.000943665	0.52608
SLC28A3	0.642347	4.48031	3.73441	0.000253453	0.00160413	-0.0448698
EBLN2	0.641989	7.32726	4.05573	7.47996e-05	0.000563946	1.09522
MAPKAPK2	0.641722	7.0094	5.9166	1.66075e-08	4.3567e-07	9.10686
LOC100506459	0.641138	5.21895	4.43359	1.62204e-05	0.000150864	2.5345
FAM228B	0.64059	6.61981	4.99418	1.4079e-06	1.86342e-05	4.85463
SYK	0.640011	8.76406	4.11218	5.99073e-05	0.000466802	1.30357
TMEM185B	0.639763	5.79443	4.92849	1.89457e-06	2.41537e-05	4.57182
E2F3	0.639752	7.87958	5.32461	3.03789e-07	5.1246e-06	6.31888
RHOT1	0.6392	8.29239	3.69304	0.000294964	0.00182509	-0.185881
IFNGR2	0.638953	10.6405	4.73233	4.52298e-06	5.06009e-05	3.74438
CAB39	0.638845	8.61023	3.2299	0.00147613	0.00721564	-1.67102
ALDOA	0.638233	10.2308	4.05591	7.47496e-05	0.000563777	1.09585
MVP	0.6379	8.66265	4.16027	4.94946e-05	0.000394838	1.48295
RHOU	0.637752	5.97675	3.8701	0.000152773	0.00103512	0.426922
PGK1	0.637408	8.91809	4.59348	8.24923e-06	8.46943e-05	3.17433
MICAL1	0.637333	8.28799	3.80147	0.000197684	0.0012874	0.186519
SIAH2	0.636505	9.17258	2.34701	0.02003	0.0628129	-4.00275
C8orf60	0.635349	6.97894	4.88227	2.33084e-06	2.86965e-05	4.37456
NUSAP1	0.635157	6.27069	3.34669	0.000998691	0.00514352	-1.31292
LOC102724387	0.635142	4.3471	2.22483	0.0273552	0.080666	-4.27128
IDH1	0.632351	7.59849	4.83364	2.89457e-06	3.46165e-05	4.16851
YWHAE	0.631489	7.69649	4.07273	6.99808e-05	0.000533512	1.15769
CDC20	0.630804	6.05793	2.93466	0.00378168	0.015968	-2.5256
LRP10	0.630459	9.05485	5.37403	2.40162e-07	4.20016e-06	6.54375
SRGN	0.630143	10.7187	4.53611	1.05348e-05	0.00010449	2.9427
KIAA0319L	0.6301	7.82053	4.00984	8.94492e-05	0.000656025	0.927566
MYO1F	0.629843	10.4735	3.65489	0.00033886	0.00205811	-0.314711
TGFA	0.629794	6.30486	5.42418	1.88932e-07	3.42724e-06	6.77343
CAMTA2	0.629636	6.76426	4.65379	6.36395e-06	6.78578e-05	3.42031
STK3	0.628082	4.63384	5.40505	2.07076e-07	3.69736e-06	6.68563
MBOAT7	0.628041	8.69335	5.49	1.37591e-07	2.6312e-06	7.07716
TUBA4A	0.62793	10.2559	3.95541	0.000110371	0.000782902	0.730783
RGL1	0.627492	6.82921	3.82821	0.000178868	0.00117761	0.279769
ARHGAP26	0.626925	6.36199	5.34182	2.79953e-07	4.78963e-06	6.39705
SESN2	0.626497	7.051	5.42278	1.90203e-07	3.44114e-06	6.76701
TMEM33	0.626437	7.58219	3.66457	0.000327164	0.00199407	-0.282106
IFI35	0.626138	7.9045	2.4831	0.0139549	0.046803	-3.6878
AGTPBP1	0.625787	7.82842	3.55136	0.000491094	0.00281553	-0.658531
HEPACAM2	0.625429	4.59492	2.15741	0.0323212	0.0921823	-4.41368
ITGB2	0.625324	9.33156	3.5903	0.000427516	0.00250511	-0.530192
ANLN	0.625161	3.72034	3.74041	0.000247918	0.00157397	-0.0243258
NATD1	0.625077	7.3354	5.30037	3.40718e-07	5.64516e-06	6.20916
PCMT1	0.623605	8.882	3.74129	0.000247107	0.00156979	-0.0212784
DYNLT1	0.623028	10.9485	4.01952	8.61492e-05	0.000635696	0.962788
EHBP1L1	0.622013	6.40634	5.60397	7.89898e-08	1.668e-06	7.60917
SLC8A1-AS1	0.621953	4.10687	3.55785	0.000479914	0.00276231	-0.637226
MYD88	0.621575	11.5091	4.94084	1.79204e-06	2.29898e-05	4.6248
CYP4F2	0.6214	6.00076	4.4344	1.61655e-05	0.00015049	2.5377
BSG	0.621001	9.1938	2.33321	0.0207605	0.064579	-4.03376
GNAQ	0.619575	8.35669	4.62201	7.29858e-06	7.63515e-05	3.29038
NUCB1	0.619497	7.77336	3.97656	0.000101741	0.000730493	0.806983
ARPC1B	0.619054	10.9725	4.13002	5.58216e-05	0.000438641	1.36991
WBP2	0.618887	8.67822	4.49439	1.25682e-05	0.000121594	2.77569
SORL1	0.618321	10.5213	3.39245	0.000854491	0.00450054	-1.16957
SHCBP1	0.618012	4.3751	2.59647	0.0102096	0.0364335	-3.4128
BATF	0.617673	8.4555	5.8215	2.68394e-08	6.5929e-07	8.64546
ZFP36	0.617222	10.7284	4.67745	5.74427e-06	6.2223e-05	3.51749
GMFG	0.61688	10.8374	2.98561	0.00323064	0.0140105	-2.38338
LINC00597	0.616306	4.82832	2.86411	0.00468728	0.0191096	-2.71886
NFAM1	0.615976	8.05315	5.45956	1.59371e-07	2.98085e-06	6.93638
PRDM5	0.615898	4.20417	4.72127	4.74706e-06	5.27754e-05	3.69846
MCU	0.615728	7.5671	4.52677	1.09605e-05	0.000107979	2.90521
PLAUR	0.61499	7.54101	4.84166	2.79328e-06	3.35817e-05	4.20239
OS9	0.614885	8.82565	5.00822	1.32087e-06	1.77502e-05	4.91544
ATOX1	0.614861	8.38195	4.89334	2.21823e-06	2.75087e-05	4.42168
FBXO9	0.614603	7.29172	6.20277	3.80669e-09	1.24828e-07	10.5248
IDI1	0.613378	8.47226	3.81198	0.000190074	0.00124258	0.223113
TLR6	0.612712	6.4567	3.72522	0.000262163	0.00165082	-0.0762951
NDUFAF1	0.611677	6.55071	3.69078	0.000297405	0.00183685	-0.193535
TMEM91	0.61106	6.92556	4.77685	3.72041e-06	4.28425e-05	3.92992
SGMS2	0.611031	5.51577	3.86287	0.000157005	0.00105888	0.401417
UBE2J1	0.610802	8.15756	4.13892	5.38849e-05	0.000425712	1.40308
NBEAL2	0.610721	6.78117	4.86589	2.50763e-06	3.06153e-05	4.305
PROS1	0.610718	4.91214	2.37842	0.0184516	0.0587547	-3.93154
KRT23	0.608827	7.62619	2.09634	0.0374725	0.103268	-4.53905
ATP6V1A	0.608486	8.85819	3.69061	0.000297588	0.00183688	-0.194109
RIN3	0.608363	7.16996	4.78061	3.65939e-06	4.22565e-05	3.94564
TIFA	0.606489	6.52135	3.21343	0.00155848	0.00755142	-1.72064
RHBDD2	0.606196	7.4488	4.94582	1.75224e-06	2.26142e-05	4.64619
FOXM1	0.604999	5.101	3.98955	9.67606e-05	0.000699123	0.853976
FURIN	0.604899	8.26632	4.60469	7.86225e-06	8.12512e-05	3.21986
ATG9A	0.604511	7.46997	5.10031	8.66591e-07	1.24524e-05	5.31739
RNF135	0.603871	8.36002	3.02057	0.00289637	0.01277	-2.28453
ITGA2B	0.603597	5.9198	2.88157	0.00444636	0.0182804	-2.67143
DMXL2	0.602909	7.49826	3.35834	0.000959948	0.00498287	-1.27657
EFCAB2	0.602133	4.17142	4.30672	2.73992e-05	0.00023756	2.03966
KIF14	0.602034	4.33741	3.21439	0.00155356	0.00753472	-1.71775
NRD1	0.601352	8.40181	4.47978	1.33659e-05	0.00012804	2.71749
XRN2	0.60132	7.74448	3.1144	0.00215018	0.00992262	-2.01408
CYBRD1	0.601052	6.52371	3.23727	0.00144064	0.00707596	-1.64877
EIF4G3	0.60082	5.38677	5.79942	2.9982e-08	7.21233e-07	8.53907
THBD	0.600758	6.06171	3.65402	0.00033992	0.00206378	-0.317609
CCRL2	0.600258	6.23034	3.46175	0.00067269	0.00367939	-0.949189
DIAPH2	0.599972	5.67035	4.73376	4.49474e-06	5.03953e-05	3.75032
NPEPPS	0.599637	7.62946	4.19329	4.33724e-05	0.00035148	1.60712
CIDEB	0.59892	8.03468	4.69797	5.25429e-06	5.7463e-05	3.6021
IL13RA1	0.598611	7.26407	2.7397	0.00677898	0.0259322	-3.0492
RASGEF1A	0.597975	5.32022	3.56766	0.000463465	0.00267893	-0.60495
RENBP	0.597507	6.36115	5.1995	5.47158e-07	8.4434e-06	5.75641
FBXL5	0.596737	10.0321	3.86311	0.000156862	0.00105826	0.402266
ELMO2	0.59516	6.88278	4.98222	1.48638e-06	1.95843e-05	4.80294
C17orf62	0.595085	9.27072	3.85739	0.000160285	0.00107604	0.382112
FHL2	0.59441	6.61278	2.93964	0.00372424	0.0158004	-2.5118
KIF20A	0.594316	4.94515	3.92394	0.000124507	0.000868025	0.618075
RP2	0.594047	6.05972	3.70516	0.000282181	0.00175715	-0.144709
SKAP2	0.593793	7.55795	4.89881	2.16458e-06	2.69742e-05	4.44499
ACPP	0.593733	5.29953	4.2779	3.0817e-05	0.000261867	1.92887
SELPLG	0.593497	9.2314	4.43087	1.64057e-05	0.000152169	2.52376
ZNF281	0.592292	8.42796	3.28515	0.00122861	0.00617233	-1.50302
CORO1C	0.592137	8.8107	4.13024	5.57723e-05	0.000438422	1.37074
CA1	0.591832	6.95699	2.23445	0.0267042	0.0791571	-4.25064
CETP	0.591431	4.76712	4.43649	1.60254e-05	0.000149527	2.54593
OASL	0.591026	7.23928	2.06767	0.0401247	0.109238	-4.59673
PGM2	0.590764	8.00642	2.92569	0.00388715	0.0163358	-2.55041
RTN4	0.590628	10.1071	4.53615	1.05328e-05	0.00010449	2.94289
CREG1	0.590357	9.80947	3.7121	0.000275094	0.00171772	-0.121062
KIF4A	0.590287	5.57491	3.5772	0.000447981	0.0026071	-0.573493
DPH3	0.590279	7.45611	3.70334	0.000284068	0.00176675	-0.150902
LAMTOR2	0.589913	7.4108	4.47756	1.34909e-05	0.000128996	2.70868
PPP1R15A	0.589612	7.13923	5.2286	4.77564e-07	7.54006e-06	5.88638
LAMTOR5	0.58888	9.92337	4.61462	7.53396e-06	7.84928e-05	3.26029
GYPA	0.588019	5.34635	1.97578	0.0497326	0.12975	-4.7765
NCF1	0.587191	9.5041	3.1279	0.00205876	0.00955896	-1.97454
MMP25	0.586926	7.80309	4.30126	2.80171e-05	0.000241893	2.01864
MARCO	0.586439	6.55715	3.6122	0.000395264	0.00234364	-0.457513
ATP6V1B2	0.5864	10.7863	3.86056	0.00015838	0.00106604	0.393274
CHP1	0.586384	8.22369	5.21487	5.09264e-07	7.9607e-06	5.82497
TRAPPC5	0.584749	9.19324	4.61055	7.66701e-06	7.96357e-05	3.2437
UBE2H	0.584578	6.77681	4.53722	1.04851e-05	0.000104098	2.94718
TNFRSF10C	0.584565	8.41534	3.30251	0.0011592	0.00585814	-1.44971
ACTR1A	0.584524	7.99036	5.55253	1.01567e-07	2.03551e-06	7.3681
PTAFR	0.583949	8.91617	4.21747	3.93565e-05	0.000324035	1.69854
MERTK	0.583896	4.52611	4.41114	1.78115e-05	0.000163801	2.44609
TMLHE	0.583699	5.64097	6.56193	5.65506e-10	2.59448e-08	12.3638
MOSPD2	0.582736	8.36616	4.07571	6.91664e-05	0.000528288	1.16867
PPP4R1	0.582266	9.39565	3.46308	0.000669587	0.00366732	-0.944924
LOC145474	0.582192	4.16574	2.93484	0.00377962	0.0159659	-2.52511
ZDHHC3	0.58152	6.64658	7.59133	1.74199e-12	2.1344e-10	17.9593
CLIC1	0.581108	11.7004	4.31577	2.64027e-05	0.00023009	2.07459
CYYR1	0.581068	4.22514	3.88549	0.000144125	0.000985	0.481339
RIPK3	0.580347	6.89913	6.23495	3.21717e-09	1.0917e-07	10.6869
NFKBIA	0.580022	8.30431	5.57725	9.00236e-08	1.86067e-06	7.48377
ASAP1-IT2	0.579753	5.10692	3.39052	0.000860161	0.00452341	-1.17565
SMIM1	0.579505	6.88714	2.43942	0.0156967	0.0516127	-3.79069
LRRC6	0.579131	5.63385	3.97314	0.00010309	0.000738757	0.794651
PDLIM7	0.579088	6.11882	5.86969	2.10573e-08	5.33921e-07	8.87863
GMIP	0.578928	7.14	4.36021	2.19946e-05	0.00019653	2.24691
CENPBD1P1	0.577905	7.02504	6.16553	4.62208e-09	1.47546e-07	10.3378
DHCR24	0.577254	5.89007	5.09073	9.05642e-07	1.29138e-05	5.27533
SLC15A3	0.575975	7.09184	4.16873	4.78512e-05	0.000383222	1.5147
SECTM1	0.575793	9.55377	2.82194	0.00531902	0.0212118	-2.83233
NCSTN	0.575229	6.1572	5.80166	2.9648e-08	7.14555e-07	8.54984
RAB10	0.574451	10.1601	4.44298	1.55963e-05	0.000145855	2.57158
SLC26A6	0.573909	5.69919	3.97997	0.000100408	0.000722671	0.819329
IL1RAP	0.573708	6.39272	2.83155	0.00516854	0.0207451	-2.8066
TMEM119	0.572882	3.93018	3.61379	0.000393008	0.00233232	-0.452207
GLRX	0.572236	10.0192	3.46106	0.000674317	0.00368495	-0.951416
NDST2	0.571608	6.57312	5.77908	3.31959e-08	7.86174e-07	8.44125
SLC9A8	0.570337	7.23411	3.7657	0.000225795	0.00144925	0.0626705
ADORA2B	0.569787	5.70711	4.47897	1.34111e-05	0.000128413	2.71429
NFAT5	0.569694	7.58243	3.79967	0.000199018	0.00129444	0.180255
TMEM88	0.568524	6.01347	4.91639	2.0004e-06	2.52046e-05	4.52007
TUFT1	0.568155	5.50694	4.26381	3.26328e-05	0.000275809	1.87493
S100A4	0.568145	12.1917	3.09042	0.0023218	0.0105622	-2.08391
PDK3	0.56751	6.91555	4.31188	2.68265e-05	0.000232891	2.05958
APAF1	0.567409	6.18813	5.80872	2.86167e-08	6.94608e-07	8.58385
PSMB3	0.567107	10.5622	3.17689	0.00175654	0.00835673	-1.82986
ITPKC	0.566682	6.59715	4.18816	4.42745e-05	0.000357798	1.58775
IGF2BP3	0.566493	4.96549	3.35598	0.000967697	0.00500911	-1.28396
ACTN1	0.566418	8.64094	5.00039	1.36876e-06	1.8246e-05	4.8815
NMNAT1	0.566075	5.20439	6.50575	7.65175e-10	3.28239e-08	12.072
ZYG11B	0.564898	7.40397	2.87967	0.00447202	0.0183748	-2.67661
LAMP2	0.564492	9.03611	2.70254	0.00755078	0.0284119	-3.14527
TK1	0.564352	6.62793	4.14456	5.26894e-05	0.000416749	1.42417
FCGR1A	0.564239	3.47826	4.72946	4.58004e-06	5.11275e-05	3.73247
FKBP15	0.563714	6.05918	5.47529	1.47725e-07	2.79626e-06	7.00907
LAMTOR1	0.563677	9.69371	5.30292	3.36626e-07	5.59549e-06	6.22071
TLN1	0.563253	6.77861	6.16733	4.57895e-09	1.46856e-07	10.3468
MARK2	0.562388	5.80029	4.90091	2.1443e-06	2.67868e-05	4.45394
PHF23	0.562159	7.69148	5.33249	2.92634e-07	4.9692e-06	6.35467
ILK	0.561883	9.41225	4.92724	1.90518e-06	2.42587e-05	4.56651
KCTD21	0.561243	6.29096	5.50258	1.29462e-07	2.50147e-06	7.13551
PDSS1	0.560473	6.2565	4.35128	2.282e-05	0.000203107	2.21215
SSH1	0.560095	6.19405	5.56604	9.50869e-08	1.93462e-06	7.43131
PRUNE2	0.55997	4.20837	3.49396	0.00060118	0.00334323	-0.845468
OSM	0.559158	6.20523	4.95362	1.69165e-06	2.19636e-05	4.6797
SP1	0.559147	7.42458	4.85165	2.67183e-06	3.22543e-05	4.24466
CANT1	0.558895	7.82987	5.27432	3.85271e-07	6.25722e-06	6.09165
ANG	0.55772	5.26766	4.13479	5.47745e-05	0.00043174	1.3877
WSB2	0.557461	9.60831	3.09996	0.00225207	0.0103022	-2.05619
TOR1AIP1	0.556878	6.95813	4.25806	3.34025e-05	0.000281616	1.85297
ACTR2	0.556656	8.03032	3.80002	0.000198759	0.0012934	0.181468
ARF3	0.555944	8.38924	4.89851	2.16749e-06	2.6994e-05	4.44371
TFE3	0.555928	6.00652	6.74513	2.08856e-10	1.10145e-08	13.3259
TAPBP	0.555645	7.78581	4.41588	1.74632e-05	0.000160961	2.46474
GNB4	0.555609	7.14868	3.94315	0.000115688	0.00081403	0.686775
EDEM2	0.555356	7.35286	3.18565	0.00170705	0.00816114	-1.80379
SSH2	0.555136	6.06148	5.51661	1.20947e-07	2.36373e-06	7.2007
ZSWIM6	0.55513	9.28213	3.57311	0.000454553	0.00263935	-0.586978
TRIM6	0.554859	3.87116	3.02641	0.00284369	0.012559	-2.2679
NRBF2	0.554457	8.24444	2.45507	0.0150514	0.049916	-3.75401
TBC1D10B	0.554147	8.18879	5.32926	2.97163e-07	5.03774e-06	6.33998
RASGRP4	0.553994	6.35128	6.75249	2.00604e-10	1.06849e-08	13.3649
BEX1	0.553863	5.23745	3.06066	0.0025523	0.0114403	-2.16987
CTBS	0.553266	8.40654	2.68126	0.0080278	0.0298609	-3.19974
LOC101926963	0.552905	6.264	3.95234	0.00011168	0.000790657	0.719757
FOXO3	0.552686	8.82461	3.2553	0.00135711	0.00672378	-1.59412
MLF2	0.552036	8.71038	5.20819	5.25395e-07	8.16918e-06	5.79518
TP53I11	0.551835	5.98132	6.27694	2.58098e-09	9.07424e-08	10.8992
ANKRD13A	0.551465	9.03752	3.30688	0.00114231	0.0057842	-1.43625
DEDD2	0.551322	8.57337	4.75058	4.17564e-06	4.731e-05	3.82026
PLD1	0.551043	4.42528	6.73759	2.17667e-10	1.12757e-08	13.286
MAPK1	0.550894	8.12101	5.48756	1.39222e-07	2.65742e-06	7.06587
PSTPIP1	0.550635	8.29694	2.94594	0.00365271	0.0155324	-2.4943
CEBPE	0.550547	6.48232	3.11994	0.00211224	0.00977623	-1.99789
RSPH9	0.55045	4.96117	4.25396	3.39625e-05	0.000285397	1.83731
FCN1	0.549929	11.1513	2.87293	0.00456405	0.0187004	-2.69492
FAM214B	0.549101	7.96512	4.54932	9.9597e-06	9.9753e-05	2.99585
TRIQK	0.54889	5.68176	5.05813	1.05179e-06	1.46411e-05	5.13263
GABARAPL2	0.548414	11.3231	3.44565	0.000711381	0.00384578	-1.00075
TBL1X	0.548337	6.63511	3.91414	0.000129255	0.000896091	0.583088
DHCR7	0.54823	5.8618	4.47736	1.35022e-05	0.000129023	2.70789
LGALS8	0.547382	7.05726	3.72373	0.000263604	0.00165759	-0.0813934
VAT1	0.545952	7.66904	4.60753	7.76676e-06	8.03862e-05	3.23144
DKFZp667F0711	0.54576	5.18767	4.4986	1.2347e-05	0.000119737	2.79249
SLC31A2	0.544781	9.47036	2.80519	0.00559087	0.0221021	-2.87699
LDLRAD3	0.544541	4.65069	3.72064	0.00026661	0.00167292	-0.0919379
JMJD6	0.544073	5.95293	6.12851	5.60184e-09	1.74202e-07	10.1526
CAP1	0.543709	12.0163	4.39631	1.89429e-05	0.000172963	2.38792
CBL	0.543329	7.53612	5.00761	1.32456e-06	1.77775e-05	4.91279
HK1	0.543096	9.49923	3.91206	0.000130283	0.000902151	0.57568
STX10	0.542944	8.66799	4.64262	6.67829e-06	7.09139e-05	3.37459
HIST1H2AJ	0.542372	7.38275	5.48144	1.43402e-07	2.72703e-06	7.03753
NOP10	0.542316	11.1185	3.99232	9.5733e-05	0.000693412	0.863974
TRPM6	0.542296	5.77326	5.65526	6.13828e-08	1.33052e-06	7.8511
ARRDC4	0.542003	7.55675	1.989	0.048241	0.126731	-4.75113
S100A8	0.541735	11.0651	4.18979	4.39864e-05	0.000355751	1.59389
PAG1	0.541478	9.25654	2.88319	0.00442456	0.0181944	-2.66701
CCNB1	0.540906	4.94514	2.27723	0.0239681	0.0725817	-4.15777
SLC6A6	0.540549	6.14995	4.81478	3.14683e-06	3.72789e-05	4.08906
CEP19	0.540102	7.27176	2.72974	0.00697857	0.0266161	-3.07508
ELL	0.539996	5.7012	4.91479	2.01488e-06	2.53401e-05	4.51321
ATG7	0.539838	5.82104	6.17162	4.47779e-09	1.44291e-07	10.3683
TMC4	0.53968	5.98947	4.96013	1.64264e-06	2.13951e-05	4.70771
TNFSF14	0.539498	7.18589	3.85352	0.000162641	0.00108873	0.368498
TOR1B	0.538899	7.8934	2.60841	0.00987323	0.0353935	-3.38318
COQ2	0.538745	5.91366	4.15143	5.12699e-05	0.000406622	1.44983
VPS8	0.537027	5.60719	4.66944	5.94714e-06	6.40475e-05	3.48456
USP4	0.536919	8.97393	3.48685	0.000616318	0.00341394	-0.868428
AGO2	0.536253	7.86489	3.72365	0.000263682	0.00165759	-0.0816672
TRIB1	0.536148	5.32435	6.32001	2.05696e-09	7.4363e-08	11.118
KDM7A	0.53567	7.67732	5.0261	1.2176e-06	1.64977e-05	4.99304
WFDC1	0.53528	5.42039	2.81133	0.00548973	0.0217695	-2.86063
PRR13	0.534577	10.4122	4.50182	1.21804e-05	0.000118457	2.80535
HIST1H2AE	0.534233	5.57926	3.28328	0.00123632	0.0062019	-1.50875
PRKAR1A	0.53422	8.76903	3.41582	0.000788579	0.00419878	-1.09568
ATP6V0E1	0.53315	8.76679	4.38593	1.97761e-05	0.000179211	2.34727
UBE2C	0.532042	6.66933	3.60241	0.00040939	0.0024141	-0.490054
TNFSF13B	0.531545	10.7755	2.24987	0.0256883	0.076847	-4.21737
TANK	0.531002	7.51969	4.74802	4.22269e-06	4.77374e-05	3.80962
LYST	0.529769	8.00116	3.4497	0.000701455	0.00380317	-0.987801
PRR24	0.529036	6.46404	3.94346	0.00011555	0.00081334	0.687891
FCGR2A	0.529022	7.24756	3.91611	0.000128287	0.000890736	0.590116
MSRA	0.528852	5.61169	5.00661	1.33057e-06	1.78415e-05	4.90847
H2AFY	0.528278	9.0309	3.54408	0.000503915	0.00287598	-0.682372
TPM4	0.52747	6.21999	4.95977	1.64535e-06	2.14168e-05	4.70614
LSP1	0.527469	9.74828	2.80185	0.00564657	0.0223007	-2.88586
LATS2	0.526894	6.53449	5.87159	2.08562e-08	5.31456e-07	8.88785
USB1	0.5264	6.68737	6.87884	9.99985e-11	5.82954e-09	14.0378
PPT1	0.526196	10.9476	3.13996	0.00198024	0.00924683	-1.93914
CSAD	0.525689	6.12474	3.56846	0.000462151	0.00267209	-0.602321
MYL6B	0.525141	6.93053	3.24866	0.00138733	0.00684862	-1.61427
PPP2R3C	0.524771	6.1222	3.97962	0.000100545	0.000723332	0.818055
LST1	0.524342	9.71354	3.11571	0.00214112	0.00989199	-2.01024
IGF1R	0.524274	6.7229	4.47729	1.35064e-05	0.000129023	2.7076
ANKRD9	0.524269	6.43237	2.76944	0.00621367	0.0241811	-2.97146
OAT	0.524013	8.91949	2.79434	0.00577362	0.0226843	-2.90578
TNNI2	0.523938	6.00913	4.96148	1.63269e-06	2.13334e-05	4.7135
ORMDL2	0.523845	8.6347	4.16178	4.91982e-05	0.000392626	1.4886
TBC1D14	0.523155	8.46585	3.84512	0.000167866	0.00111848	0.338992
LOC153546	0.522647	5.93616	4.03873	7.99377e-05	0.00059762	1.03293
TOP2A	0.522424	4.5109	2.55672	0.0114052	0.0398046	-3.51051
LOC101926918	0.5224	5.46486	4.77321	3.78045e-06	4.33851e-05	3.91471
LOC101927974	0.522202	6.13956	4.2864	2.97684e-05	0.000254543	1.96149
MEF2BNB	0.522154	7.22843	5.22058	4.95844e-07	7.77469e-06	5.85049
SEC23B	0.52106	7.357	3.33424	0.0010417	0.00533043	-1.35164
FAM200B	0.520781	7.10763	3.21808	0.00153479	0.00746602	-1.70664
CCDC125	0.519985	5.40631	4.19759	4.26314e-05	0.000346458	1.62333
S100A6	0.519884	8.39048	4.88045	2.3499e-06	2.88964e-05	4.36681
PPM1N	0.519759	5.18163	5.04	1.14276e-06	1.56829e-05	5.05352
HSPB1	0.518903	7.87767	2.30646	0.022243	0.0681647	-4.09338
ASL	0.518839	6.52447	3.89595	0.000138515	0.000950466	0.51843
LINC01410	0.518391	6.97258	3.02163	0.00288673	0.012733	-2.28151
SIGLEC7	0.51801	6.92274	4.33899	2.40037e-05	0.000212166	2.16444
TRIM21	0.517221	8.33917	3.1033	0.00222811	0.0102109	-2.04647
HPD	0.516883	4.83196	4.09684	6.36466e-05	0.000492376	1.24672
NEDD4	0.516448	6.11565	2.71154	0.0073568	0.0277842	-3.1221
LOC101927451	0.515913	7.50632	3.15396	0.00189247	0.00889794	-1.89783
GPI	0.515897	8.40225	2.26538	0.0247004	0.0745017	-4.18367
ADAM17	0.515662	7.40439	4.28552	2.98753e-05	0.000255351	1.95811
AGO4	0.515394	6.13835	3.87877	0.000147841	0.00100703	0.457569
CYTH4	0.515353	7.37909	4.08104	6.77308e-05	0.000519067	1.18835
PICALM	0.515067	8.0572	3.19013	0.00168219	0.00805733	-1.7904
TMOD3	0.514615	6.143	4.23261	3.70255e-05	0.000307349	1.756
SLC25A40	0.513847	7.18348	2.78184	0.00599074	0.023416	-2.9388
SLC24A4	0.513646	5.95861	4.52093	1.1235e-05	0.000110259	2.8818
ELL2	0.513591	6.14554	4.24777	3.48246e-05	0.000291087	1.8137
AZI2	0.513179	6.45718	3.61544	0.000390683	0.00232321	-0.446707
CDC42-IT1	0.512975	7.87015	2.34161	0.020313	0.0635438	-4.0149
SERPINB8	0.512862	6.30766	7.05972	3.64694e-11	2.60417e-09	15.0135
GJB6	0.512798	4.08132	2.3738	0.0186764	0.0593319	-3.94205
YWHAH	0.512463	5.3282	5.56246	9.6767e-08	1.96044e-06	7.41451
SMG7	0.511801	6.31092	6.24049	3.12515e-09	1.06724e-07	10.7149
PTBP3	0.511799	7.77212	3.84559	0.000167566	0.00111722	0.340657
BID	0.511297	8.40763	3.11701	0.00213219	0.00985517	-2.00644
RILPL2	0.511199	8.80504	3.52959	0.000530394	0.00300969	-0.729726
RNPEP	0.510999	8.01616	3.29181	0.00120153	0.00604665	-1.48259
TNPO3	0.510698	7.36937	4.351	2.28459e-05	0.000203249	2.21108
LAPTM4B	0.510631	5.92456	3.2296	0.0014776	0.0072211	-1.67193
LAT2	0.509924	8.10604	5.67198	5.65232e-08	1.23963e-06	7.93025
LOC100507507	0.509889	6.04263	5.75682	3.70979e-08	8.62611e-07	8.33451
UBXN7	0.509638	7.0731	3.14859	0.00192568	0.00902294	-1.91368
PJA2	0.509361	10.2253	3.03732	0.0027477	0.0122039	-2.23678
THBS1	0.509216	4.92925	3.00641	0.00302768	0.0132632	-2.32468
PLAC8	0.508928	12.2411	2.47594	0.0142279	0.0475626	-3.70477
FUT7	0.50851	6.56316	3.90696	0.000132837	0.000917349	0.55754
MBD6	0.507749	6.92818	4.04507	7.79831e-05	0.00058536	1.05614
SLC8A1	0.507594	4.69741	5.31768	3.13931e-07	5.27827e-06	6.28747
PHC2	0.506434	7.87704	6.08871	6.88228e-09	2.04986e-07	9.95443
NR1H2	0.505002	7.00455	4.98404	1.4742e-06	1.94613e-05	4.81078
MPP1	0.504836	10.4986	2.44839	0.015324	0.0506069	-3.7697
RILPL1	0.504688	6.4709	3.9715	0.000103744	0.0007425	0.788736
TNFSF13	0.504497	8.32459	3.00059	0.00308332	0.0134666	-2.34116
KIF3C	0.504365	6.57203	5.18228	5.92892e-07	9.06518e-06	5.67973
AOAH	0.504299	9.0506	2.9722	0.00336801	0.0145178	-2.42102
CCNJL	0.504084	6.57238	3.09568	0.00228309	0.0104116	-2.06863
SLC12A9	0.504045	6.21527	4.78861	3.53256e-06	4.11635e-05	3.97916
HOMER3	0.50381	5.70784	4.3624	2.17971e-05	0.0001953	2.25543
SDF2	0.503595	7.92858	4.61092	7.65468e-06	7.95481e-05	3.24522
ARID5A	0.503204	7.05553	3.95683	0.000109767	0.000779341	0.735918
PAPD4	0.503146	7.74971	2.56278	0.0112153	0.0393286	-3.49571
LYRM1	0.50285	9.03919	3.04382	0.00269199	0.0119956	-2.21821
KCTD12	0.502679	10.1364	2.71422	0.00730004	0.0276106	-3.1152
SLC22A18	0.502567	7.00885	3.71825	0.00026896	0.00168353	-0.100096
SVIL	0.502345	6.39138	4.63713	6.83854e-06	7.24276e-05	3.3521
PHACTR2	0.502313	6.92394	2.91731	0.00398816	0.0166951	-2.57353
ERI1	0.502025	5.11393	3.45743	0.000682866	0.00371617	-0.963035
UBE2D1	0.501903	6.44989	3.24807	0.00139004	0.00685867	-1.61605
TMED8	0.501477	8.25252	4.70713	5.04885e-06	5.56025e-05	3.63995
SH3BGRL3	0.500495	10.5776	3.52005	0.000548544	0.00309807	-0.760827
RPA4	0.500307	4.75576	3.71883	0.000268393	0.00168049	-0.0981344
GPSM3	0.500043	9.76941	3.73154	0.000256147	0.00161968	-0.0547048
MXD3	0.499454	8.08244	5.05175	1.08296e-06	1.50075e-05	5.10478
RAB1B	0.498857	9.10199	5.26014	4.11873e-07	6.61e-06	6.02782
QSOX1	0.498791	6.36945	6.49413	8.14412e-10	3.43598e-08	12.0118
PTEN	0.498704	8.68329	3.99946	9.31202e-05	0.000676643	0.88989
SMIM3	0.497913	7.71863	2.72823	0.0070092	0.026713	-3.07898
C3orf62	0.497249	5.55924	4.81381	3.16045e-06	3.74026e-05	4.08496
GMPR2	0.497093	7.98498	3.27027	0.00129119	0.00643754	-1.54853
MAOA	0.497052	4.57958	3.00239	0.00306604	0.0134105	-2.33608
TNF	0.496912	6.1274	4.05612	7.46867e-05	0.00056351	1.09664
LRRFIP2	0.496395	5.1238	6.42791	1.16045e-09	4.63772e-08	11.6701
ZFAND3	0.496368	7.20735	4.9511	1.711e-06	2.21726e-05	4.66887
ZDHHC12	0.495795	6.74856	4.57285	9.00953e-06	9.15812e-05	3.09081
HTATIP2	0.495445	6.86901	4.83408	2.88888e-06	3.45686e-05	4.17038
PPP3R1	0.495349	6.73012	3.30603	0.00114557	0.00579786	-1.43887
ITPRIP	0.495081	7.81859	4.44616	1.53902e-05	0.000144258	2.58415
YIPF3	0.494291	7.62795	4.31774	2.61907e-05	0.00022873	2.08219
DEDD	0.49399	7.05463	5.08314	9.37798e-07	1.32706e-05	5.24205
S100Z	0.493846	5.74285	4.05302	7.55993e-05	0.000568927	1.08525
RELT	0.493008	7.705	6.12697	5.64665e-09	1.75169e-07	10.145
MS4A6A	0.492549	8.82403	3.15766	0.00186989	0.00880999	-1.88689
ZBTB16	0.492289	6.01093	2.0343	0.0434128	0.116424	-4.66293
BIK	0.492235	6.57969	3.08666	0.00234984	0.0106778	-2.09482
RNF149	0.490243	10.9208	3.16333	0.00183581	0.00867339	-1.87012
CDK5	0.490168	6.69095	3.8103	0.000191276	0.00124885	0.217236
RGS19	0.490062	9.50631	3.39108	0.000858486	0.00451783	-1.17386
TCN2	0.489899	6.0872	3.78401	0.000210963	0.00136303	0.125946
BUB1B	0.489631	5.40837	2.08461	0.0385391	0.10561	-4.56275
GAB2	0.489394	8.06422	3.29902	0.00117286	0.00591986	-1.46045
RAC2	0.488689	11.2356	2.89994	0.00420512	0.0174853	-2.62124
CMIP	0.488526	6.93471	5.33371	2.90956e-07	4.95433e-06	6.36017
NSFL1C	0.488462	7.4243	5.10616	8.43542e-07	1.21695e-05	5.34311
HIST1H3G	0.487814	6.23162	6.29318	2.36956e-09	8.40312e-08	10.9816
TNNT1	0.487205	6.26623	3.19069	0.00167914	0.00804651	-1.78874
SMCO4	0.486931	8.29347	2.63541	0.00914899	0.0332339	-3.31575
F11R	0.486826	7.0633	4.34393	2.35208e-05	0.000208347	2.18361
LPPR2	0.486667	7.7187	5.03126	1.18928e-06	1.62126e-05	5.01548
PLOD2	0.486146	3.80665	3.0422	0.00270579	0.0120413	-2.22285
ADAM8	0.485962	7.14803	3.05956	0.00256125	0.0114754	-2.17305
ACTA2	0.48527	5.47431	6.14081	5.25561e-09	1.64939e-07	10.2141
BIRC5	0.484693	5.42918	3.47407	0.000644447	0.00355053	-0.909619
NBN	0.484517	7.47584	2.92344	0.00391404	0.0164353	-2.55662
LOC101060510	0.483962	5.17038	3.07203	0.00246188	0.0111178	-2.13713
ARG2	0.483807	5.42385	2.86169	0.00472161	0.0192189	-2.72542
MAB21L3	0.483176	3.25348	3.40015	0.000832226	0.00441166	-1.14527
AATK	0.483138	8.61644	4.57038	9.10506e-06	9.24604e-05	3.08082
ADORA3	0.48306	5.32073	3.03468	0.00277067	0.0122953	-2.24433
FTH1P5	0.482932	12.6205	6.49428	8.13758e-10	3.43598e-08	12.0125
ACOT9	0.48233	8.02304	2.63059	0.00927454	0.0336005	-3.32782
PGAM1	0.482276	11.3308	4.0044	9.13567e-05	0.000666669	0.9078
DOCK4	0.482058	4.41661	3.88795	0.000142786	0.000977153	0.490058
RHAG	0.4817	4.94341	2.41358	0.0168155	0.0545206	-3.85075
ZNHIT1	0.480724	8.13285	3.89866	0.000137097	0.000941999	0.528044
FBXL13	0.480632	3.85051	4.89888	2.16385e-06	2.69742e-05	4.44531
TMEM165	0.480371	5.90521	6.67215	3.11158e-10	1.5379e-08	12.9408
PAK2	0.480165	6.92356	4.69618	5.2954e-06	5.78508e-05	3.5947
RAD23B	0.480025	7.32918	3.50784	0.000572598	0.00320912	-0.80048
UBE2R2	0.480018	9.15713	4.55095	9.89116e-06	9.92609e-05	3.00239
KAZN	0.479369	5.67598	5.03893	1.14833e-06	1.57168e-05	5.04888
ACTN4	0.47929	8.14205	3.94132	0.000116498	0.000818606	0.680247
ACOT13	0.478408	6.75788	3.38843	0.00086632	0.00454996	-1.18222
SH2B2	0.478102	7.71197	3.21923	0.001529	0.00744031	-1.70319
SLC25A37	0.477735	10.3555	3.65236	0.000341973	0.00207455	-0.323196
ULK1	0.476913	7.35693	3.99747	9.38409e-05	0.000681396	0.882669
ARHGAP24	0.476208	5.56949	5.52167	1.18011e-07	2.31076e-06	7.22426
NPTN-IT1	0.47559	6.19969	2.55561	0.0114404	0.0399042	-3.51322
CCDC126	0.475266	6.40306	2.75431	0.00649563	0.0250828	-3.0111
SCAND1	0.474907	8.12071	4.12464	5.70239e-05	0.000447573	1.3499
C15orf65	0.473845	4.23295	5.08967	9.10087e-07	1.29501e-05	5.27066
FNIP1	0.473712	5.60172	4.28291	3.01942e-05	0.000257529	1.9481
RNF145	0.473692	6.61975	4.37845	2.03988e-05	0.000184283	2.31801
ALCAM	0.472671	6.20093	2.90595	0.0041289	0.0172068	-2.60477
ACTB	0.471977	13.1412	4.49953	1.22985e-05	0.000119391	2.79621
KNSTRN	0.471291	6.3053	4.51541	1.15007e-05	0.00011265	2.85968
PSAP	0.470938	11.3033	2.95157	0.00358991	0.0153131	-2.47865
BTBD19	0.470861	5.81172	5.67749	5.50042e-08	1.21282e-06	7.9564
LAMP1	0.469874	8.16674	3.33195	0.00104978	0.00536611	-1.35873
PLEK	0.469855	10.2733	3.90509	0.000133786	0.00092266	0.550884
FAM63A	0.469621	8.39337	4.01793	8.66838e-05	0.000638886	0.956991
HIST1H4J	0.46864	6.92634	3.25116	0.00137587	0.00680681	-1.60668
CDKN2D	0.468503	6.36512	5.15792	6.63951e-07	9.91662e-06	5.57163
SETD8	0.467582	6.35028	6.32518	2.00158e-09	7.24892e-08	11.1443
RNASEL	0.467008	7.41831	2.88147	0.00444768	0.0182821	-2.6717
AP2B1	0.46699	7.84089	3.35812	0.000960687	0.00498544	-1.27728
PRRG4	0.466773	6.69232	2.63913	0.00905295	0.0329435	-3.3064
MAPKAPK3	0.466577	8.36529	3.97761	0.000101327	0.000728514	0.810802
EPAS1	0.465869	5.11342	4.33287	2.46146e-05	0.000216816	2.14073
GLUL	0.465324	9.53156	3.21513	0.0015498	0.00752183	-1.71554
LRPAP1	0.464319	6.25406	4.52215	1.1177e-05	0.000109743	2.88669
TCTEX1D1	0.464271	3.79325	3.3687	0.000926712	0.00483349	-1.24419
STYXL1	0.46423	6.87683	4.39775	1.88303e-05	0.000172165	2.39355
ITPK1-AS1	0.463956	4.91007	2.97717	0.0033165	0.014323	-2.40709
JAK3	0.463842	6.2692	6.20137	3.83454e-09	1.2554e-07	10.5177
TACC3	0.463207	8.22557	2.83123	0.0051736	0.0207573	-2.80747
ETV6	0.463162	7.01762	3.31228	0.00112177	0.00569287	-1.4196
GRB2	0.463128	8.76528	5.05225	1.0805e-06	1.49994e-05	5.10695
PRG2	0.463006	4.8083	2.55194	0.0115573	0.0402323	-3.52218
TUBA1A	0.462203	11.7994	3.21997	0.00152526	0.0074274	-1.70095
DUSP13	0.461934	6.55798	3.7355	0.000252443	0.00159938	-0.0411541
TFEB	0.461804	7.84566	4.2599	3.31551e-05	0.00027976	1.85997
HSD3B7	0.461641	7.31826	4.02403	8.46485e-05	0.000625751	0.979255
IGFBP7	0.461585	6.12535	3.19495	0.00165588	0.00795741	-1.77601
AKAP13	0.461434	7.07635	3.88383	0.000145033	0.000990214	0.475472
ICAM1	0.461288	6.44269	4.07108	7.04351e-05	0.000536376	1.15161
MKI67	0.46124	5.08832	3.50307	0.000582275	0.00325178	-0.815961
PTPN6	0.461147	10.4621	2.66813	0.00833542	0.0307924	-3.23315
MFN2	0.461106	6.39555	5.78512	3.22073e-08	7.68992e-07	8.47029
MAFF	0.460239	6.01707	2.47595	0.0142276	0.0475626	-3.70475
NADK	0.459995	8.14502	3.45178	0.000696394	0.00377873	-0.981124
SP100	0.459918	6.75367	3.75169	0.000237808	0.00151637	0.0144168
TUBG1	0.459643	5.91282	2.49765	0.0134139	0.0453377	-3.65313
CCDC17	0.459171	5.64771	4.69241	5.38288e-06	5.87437e-05	3.57915
KIAA1715	0.458312	6.04707	2.59181	0.0103438	0.036816	-3.42434
MAD2L2	0.458264	7.26318	4.2174	3.93682e-05	0.000324035	1.69826
ATP6V1H	0.458166	6.78005	4.00637	9.06621e-05	0.000662309	0.914949
PAPSS2	0.457471	5.58382	3.61473	0.000391681	0.00232711	-0.449072
USP10	0.45729	7.36155	3.42781	0.000756658	0.00405838	-1.05762
FBN2	0.45722	4.95294	5.33308	2.91814e-07	4.95938e-06	6.35735
VAMP5	0.45673	6.21487	3.45689	0.000684154	0.00372021	-0.964774
N4BP1	0.456287	8.24799	4.01234	8.85835e-05	0.000650842	0.936678
SYNE1	0.454916	5.34503	4.24803	3.47881e-05	0.000291087	1.81469
RPS6KC1	0.454886	6.03285	2.94984	0.00360914	0.015379	-2.48347
CDCA5	0.454667	6.36588	3.12014	0.00211089	0.0097744	-1.99731
SYCP3	0.454627	3.49075	4.6753	5.79804e-06	6.27058e-05	3.50865
PTK2B	0.4545	7.73407	4.75762	4.04854e-06	4.60741e-05	3.84962
TIMP4	0.45393	4.341	3.07028	0.00247559	0.0111625	-2.14217
CYB5R1	0.4538	6.67446	7.23181	1.3792e-11	1.16616e-09	15.9547
POTEKP	0.453458	7.28804	4.04468	7.8102e-05	0.000585931	1.05471
KIF18B	0.453021	4.97706	4.17357	4.69357e-05	0.000376873	1.53286
DNAJB6	0.452982	7.16458	3.00233	0.00306654	0.0134105	-2.33622
ZMAT5	0.452908	6.2897	5.34131	2.80642e-07	4.7974e-06	6.3947
EIF2AK1	0.452615	8.38011	2.86482	0.00467719	0.0190799	-2.71693
SSFA2	0.45228	5.54373	4.33311	2.45909e-05	0.000216701	2.14164
ARPC5	0.451809	9.12052	4.56194	9.43875e-06	9.54227e-05	3.04673
VNN3	0.451534	5.39712	2.99554	0.00313224	0.013654	-2.3554
NUPL1	0.451236	6.40652	3.10168	0.0022397	0.0102548	-2.05119
GADD45B	0.45117	7.46469	4.26261	3.27917e-05	0.000277037	1.87035
IFNAR1	0.450905	6.83186	4.36903	2.12088e-05	0.000190674	2.28125
HEBP2	0.450752	7.50475	5.42303	1.89978e-07	3.44012e-06	6.76814
STX5	0.449988	6.6124	5.10385	8.5256e-07	1.22766e-05	5.33297
NLRP3	0.449925	4.53542	3.86025	0.000158565	0.00106624	0.392183
ETFDH	0.449728	4.58294	2.59759	0.0101777	0.036345	-3.41004
NEXN	0.449644	4.89654	2.41652	0.0166849	0.0541571	-3.84395
LOC102723845	0.449051	4.47697	4.94369	1.76922e-06	2.27968e-05	4.637
FHOD1	0.448566	6.92628	4.71523	4.87376e-06	5.39356e-05	3.67346
KLF6	0.448473	9.17075	3.66149	0.000330842	0.00201359	-0.292485
ATP2B4	0.44787	6.92858	4.01982	8.6047e-05	0.0006354	0.9639
RNF13	0.447722	10.026	2.51772	0.0126986	0.0434853	-3.60503
LOC440434	0.447709	7.25347	4.51761	1.13938e-05	0.000111764	2.86851
LINC01272	0.447197	5.86869	3.88533	0.000144212	0.000985261	0.48078
DHRS7	0.447106	6.47523	4.07864	6.83727e-05	0.000523398	1.1795
UBQLN2	0.446961	8.05484	2.2145	0.0280703	0.082324	-4.29338
ADAP2	0.446695	6.99495	3.5132	0.000561913	0.00316223	-0.783077
ASB7	0.446445	6.46732	5.70576	4.7821e-08	1.07529e-06	8.09072
AMPD3	0.446417	8.11338	2.6779	0.00810542	0.0301113	-3.20829
LOC100049716	0.446276	5.55922	3.71129	0.000275911	0.00172177	-0.12382
VPS25	0.446034	7.65782	3.84445	0.00016829	0.00111955	0.336638
PTPRC	0.445743	9.41785	2.45745	0.0149556	0.0496466	-3.74842
ACAA1	0.445667	7.93829	3.47379	0.000645068	0.003553	-0.910508
ARPC1A	0.445328	7.66839	3.54397	0.000504118	0.00287598	-0.682743
SLC12A6	0.445144	7.9136	3.57945	0.000444398	0.00259063	-0.566058
LOC101928635	0.444931	6.11197	4.42524	1.67957e-05	0.000155298	2.50156
CD44	0.444458	7.77814	3.56337	0.000470586	0.00271459	-0.619062
MCMBP	0.443765	6.21203	3.86208	0.000157474	0.00106099	0.398629
TRPM2	0.443434	6.49689	4.23513	3.66511e-05	0.00030486	1.76557
FHDC1	0.443134	6.55468	3.3434	0.0010099	0.0051921	-1.32317
NUDT16	0.443126	5.28301	3.60668	0.000403162	0.00238012	-0.47585
BEST1	0.443057	6.98737	4.73252	4.51924e-06	5.05868e-05	3.74516
TNFRSF1B	0.442962	9.09682	2.54119	0.0119057	0.0411997	-3.54833
ADAMTS2	0.442872	5.23051	4.13388	5.49734e-05	0.000432974	1.3843
C9orf72	0.442553	6.39852	2.75696	0.00644542	0.0249312	-3.00417
PYGM	0.442386	5.56931	4.55105	9.88662e-06	9.92609e-05	3.00283
DAPK2	0.442224	6.70557	3.87094	0.000152287	0.00103319	0.429901
ZBTB8OS	0.44163	6.03207	2.04177	0.0426575	0.114852	-4.6482
DCUN1D3	0.44117	6.67125	5.97027	1.26394e-08	3.421e-07	9.36945
TGFB1	0.441165	7.03406	4.16805	4.79826e-05	0.000383973	1.51212
PET100	0.440901	8.30131	2.37664	0.0185379	0.0589742	-3.93559
C10orf11	0.44037	5.91518	3.54667	0.000499312	0.00285548	-0.673883
DHTKD1	0.440096	6.33273	3.7116	0.000275606	0.00172039	-0.12279
C6orf89	0.439929	6.39886	4.00953	8.95572e-05	0.000656582	0.926436
KIAA1958	0.439577	5.80871	4.40186	1.85115e-05	0.000169553	2.40968
MCL1	0.439372	8.4883	3.15165	0.00190669	0.00895655	-1.90465
GINS1	0.439362	4.98919	2.16447	0.0317669	0.0910201	-4.39896
THOC5	0.439258	5.41748	4.45844	1.46188e-05	0.000138294	2.63276
TUBGCP3	0.439209	5.2844	2.98945	0.00319231	0.0138686	-2.37259
COTL1	0.439019	9.45568	2.99493	0.00313823	0.0136743	-2.35713
IL15RA	0.438882	6.44393	3.77391	0.000219028	0.0014098	0.0910013
FLJ36848	0.438216	4.87846	3.72951	0.000258067	0.0016283	-0.0616497
ACVR1B	0.438071	5.46207	6.95025	6.72615e-11	4.2218e-09	14.4213
GNB1	0.437845	9.85506	3.84289	0.000169281	0.00112473	0.33116
LOC100129550	0.437104	7.58984	2.45576	0.0150238	0.0498406	-3.7524
MYH9	0.436867	8.68679	3.52349	0.000541928	0.00306802	-0.749612
CYBB	0.43683	6.20993	4.06297	7.27113e-05	0.000551044	1.12178
RRAGC	0.43649	7.68317	5.27614	3.81992e-07	6.22319e-06	6.09982
CATIP-AS1	0.436249	5.95178	4.41426	1.75818e-05	0.00016198	2.45835
BAG4	0.435972	6.21058	3.57173	0.000456807	0.00264943	-0.591555
TMEM11	0.435895	7.80013	5.38113	2.3216e-07	4.093e-06	6.57618
UBL5	0.435689	9.29438	3.37067	0.000920503	0.00480616	-1.23801
CAPNS1	0.435609	10.5047	3.49092	0.000607595	0.00337201	-0.855268
DCTN4	0.435083	6.16956	5.11087	8.25412e-07	1.19549e-05	5.36385
FYB	0.434406	8.87079	2.47147	0.0144009	0.0480547	-3.71535
SUOX	0.434263	5.49003	5.26709	3.98618e-07	6.44275e-06	6.05909
CLTCL1	0.433516	6.82495	4.72333	4.70456e-06	5.23747e-05	3.707
ACAP2	0.43351	6.96078	3.17269	0.00178074	0.00844832	-1.84235
RAB36	0.433265	6.36302	5.01263	1.29466e-06	1.74515e-05	4.93454
SEC24D	0.433223	4.45349	3.66347	0.00032848	0.0020004	-0.285833
C9orf66	0.43272	4.44853	4.98233	1.48563e-06	1.95843e-05	4.80342
ACADVL	0.432478	8.13595	3.47639	0.000639243	0.00352661	-0.902137
FADD	0.432406	7.90229	3.39336	0.000851819	0.00448993	-1.16668
ZEB2	0.432014	6.18292	3.43685	0.00073338	0.00395514	-1.02883
RHD	0.431887	5.91824	2.21162	0.0282725	0.0828338	-4.29952
CD36	0.431861	7.17556	2.4912	0.0136514	0.0460042	-3.66853
FAM110B	0.431675	4.9589	4.78589	3.57516e-06	4.15417e-05	3.96776
PRKAR2A	0.431429	8.10243	4.1063	6.13149e-05	0.000476681	1.28176
FCGR2C	0.431332	8.56382	3.64948	0.000345554	0.00209441	-0.332864
UBALD2	0.430812	8.25314	5.01628	1.27329e-06	1.71974e-05	4.95041
PCTP	0.430757	8.2128	2.6017	0.0100611	0.035985	-3.39985
LSMEM1	0.430508	5.28469	4.29757	2.84426e-05	0.000245109	2.00443
LOC101927603	0.429441	5.86655	4.37482	2.07073e-05	0.000186493	2.30384
VPS35	0.429204	7.55093	3.79893	0.000199566	0.00129759	0.177689
GOLGA1	0.429111	6.45993	3.43273	0.000743902	0.00400258	-1.04195
CCNA2	0.428683	5.12002	2.15707	0.032348	0.092213	-4.41438
COX15	0.428538	6.83969	4.50882	1.18254e-05	0.000115411	2.83333
GNAI2	0.428496	9.68019	3.69879	0.000288827	0.00179308	-0.166344
ERMAP	0.428391	5.33945	3.06489	0.00251831	0.0113178	-2.1577
COPA	0.427791	5.34379	5.44298	1.72616e-07	3.16777e-06	6.85992
SLC17A5	0.427694	7.09639	3.92433	0.000124324	0.000867342	0.619448
VAV1	0.427011	7.91486	2.83267	0.00515132	0.0206882	-2.8036
MB21D1	0.42698	4.07282	6.37243	1.55866e-09	5.88436e-08	11.3855
IDNK	0.426929	6.95758	2.7187	0.00720583	0.0273079	-3.10363
ASNA1	0.426447	8.07528	3.84779	0.000166187	0.00110874	0.348371
RTN2	0.42636	6.35462	4.5253	1.10291e-05	0.000108551	2.8993
ANAPC15	0.426129	7.15944	3.92967	0.00012181	0.000851841	0.638544
CMTM6	0.425607	7.87914	4.29938	2.82329e-05	0.000243551	2.0114
ACSL3	0.425455	7.42247	2.20062	0.0290562	0.0847104	-4.32289
DUSP1	0.425319	8.29936	3.29654	0.00118265	0.00596044	-1.46807
FTH1	0.424875	11.0294	3.58913	0.000429306	0.00251272	-0.534061
RHBDF2	0.424599	8.17401	2.74934	0.00659074	0.0253305	-3.02408
PRELID1	0.424257	8.14576	2.6978	0.00765481	0.0287294	-3.15744
SPIDR	0.424111	6.08541	5.41595	1.96539e-07	3.54323e-06	6.73563
AP3B2	0.423945	5.21815	3.21932	0.00152856	0.00743989	-1.70292
SIGLEC16	0.423572	5.681	3.5394	0.000512337	0.00291855	-0.697699
LOC101929243	0.423494	6.67355	4.22927	3.75288e-05	0.000310897	1.74329
ATP11A	0.423038	5.66846	5.559	9.84116e-08	1.98199e-06	7.39836
ANTXR2	0.422442	6.39701	3.77668	0.000216789	0.00139582	0.100573
ZBTB7B	0.4222	7.1863	4.31444	2.65466e-05	0.000231147	2.06947
SLC31A1	0.421663	5.91753	5.34324	2.7808e-07	4.76955e-06	6.40347
SNX11	0.421402	8.69418	4.4217	1.7045e-05	0.00015746	2.48764
TTC7B	0.420041	5.16461	2.32732	0.0210788	0.0653606	-4.04693
RAB1A	0.419811	7.09225	3.33582	0.00103612	0.00530692	-1.34671
MED13L	0.419248	7.56135	3.50153	0.000585439	0.00326588	-0.820967
KIF2C	0.418944	5.88459	3.54969	0.000494003	0.00282908	-0.663996
NKIRAS2	0.41812	6.90418	4.81743	3.1102e-06	3.69147e-05	4.10019
NFYC	0.41805	6.16469	3.82766	0.000179243	0.0011797	0.277816
NFKB1	0.417948	8.44369	3.69661	0.000291139	0.00180469	-0.173751
SLC1A3	0.417259	4.64872	3.99059	9.63746e-05	0.000696682	0.857719
PLAGL2	0.416456	6.5263	4.5034	1.20992e-05	0.000117724	2.81167
NINJ1	0.416263	8.40038	2.75745	0.00643625	0.0249099	-3.0029
TMBIM6	0.415411	10.5236	3.4584	0.000680578	0.00370766	-0.95994
AKAP10	0.414992	7.2521	2.57395	0.0108724	0.03841	-3.46833
KDM1B	0.414558	4.9697	2.96021	0.00349542	0.0149756	-2.45457
COL9A3	0.414466	5.61543	2.28008	0.0237951	0.0721523	-4.15154
LOC100507670	0.414108	5.28181	4.88945	2.25722e-06	2.79019e-05	4.4051
DICER1	0.41391	7.22808	4.44861	1.52329e-05	0.000143047	2.59386
TFF3	0.413417	5.69073	3.84286	0.000169297	0.00112473	0.331068
RAP1GAP	0.412905	6.8167	2.55762	0.0113769	0.0397598	-3.50832
OSBPL2	0.412159	7.44225	3.58029	0.000443076	0.0025837	-0.563299
GYS1	0.411895	7.37335	3.86186	0.000157602	0.00106151	0.39787
MRC1	0.411711	4.13671	2.05231	0.0416111	0.112566	-4.62734
EMB	0.411568	7.9775	2.53711	0.0120401	0.0415806	-3.55821
WNK1	0.411207	6.95634	4.64117	6.72023e-06	7.12483e-05	3.36865
LINC00963	0.411057	5.19013	4.17979	4.57833e-05	0.000368787	1.55624
RDH5	0.410957	5.72026	3.96051	0.000108226	0.000769997	0.749155
ABTB1	0.410455	6.75179	4.39516	1.90336e-05	0.000173636	2.38341
ZFYVE16	0.410031	5.40675	3.8701	0.000152775	0.00103512	0.426914
C15orf39	0.409771	6.48993	3.76184	0.000229044	0.00146643	0.0493678
H3F3A	0.409673	7.55227	2.88448	0.00440727	0.0181325	-2.66349
TMEM110	0.409552	6.3816	3.96605	0.000105945	0.000756062	0.769083
B3GNTL1	0.408687	6.27244	5.56441	9.58476e-08	1.9476e-06	7.42367
LOC100506585	0.408538	5.16521	4.37553	2.06459e-05	0.000186104	2.30664
CPNE2	0.407905	7.84742	2.37158	0.0187857	0.0596236	-3.94712
MTHFD2	0.407843	6.59924	2.79487	0.00576456	0.0226574	-2.90437
PTTG1IP	0.407744	10.3053	2.79452	0.00577045	0.0226762	-2.90529
FBXO38	0.407615	7.09551	2.91847	0.00397404	0.0166462	-2.57033
MEIS3P1	0.407277	5.27638	3.00287	0.00306137	0.0133936	-2.3347
ST3GAL2	0.406988	6.82148	5.45775	1.6077e-07	2.99803e-06	6.92801
RGS3	0.406729	5.80899	5.83191	2.54716e-08	6.28709e-07	8.69572
MR1	0.406418	6.6252	3.2153	0.00154893	0.00751936	-1.71502
UPB1	0.406012	5.35241	4.11702	5.87707e-05	0.00045847	1.32156
RGS14	0.405882	7.23434	3.5627	0.000471706	0.00271966	-0.621263
SH3RF3	0.405848	4.98798	3.58924	0.000429143	0.00251272	-0.533709
ENC1	0.405529	6.14872	2.46061	0.014829	0.0492742	-3.74099
PHKA2	0.405255	6.24956	4.65026	6.46183e-06	6.8794e-05	3.40583
CYB5R4	0.405202	6.8603	2.56851	0.0110383	0.0388109	-3.48169
TMEM127	0.405112	7.90741	5.46587	1.54599e-07	2.90754e-06	6.9655
B9D2	0.404919	6.61057	4.00678	9.05177e-05	0.00066149	0.916442
MSRB3	0.404773	5.31416	4.41065	1.78475e-05	0.000164048	2.44418
RAB5A	0.40469	6.69302	3.83442	0.000174751	0.00115422	0.301488
GLTP	0.404553	8.49325	3.21605	0.00154508	0.00750602	-1.71275
ZNF319	0.404154	6.68789	3.70619	0.000281117	0.00175159	-0.141194
TREML2	0.403792	7.65182	3.17908	0.00174402	0.00831032	-1.82334
GALNT3	0.40331	6.30893	3.56977	0.000459996	0.00266264	-0.597996
LOC102723779	0.403174	6.39742	3.1093	0.00218566	0.0100501	-2.02897
ST20	0.403114	7.27091	2.42926	0.0161285	0.0527022	-3.81437
CD300C	0.403075	7.06585	4.3203	2.59176e-05	0.000226709	2.09208
DENND5A	0.403015	9.6768	2.52679	0.0123868	0.0425766	-3.58318
KIAA0754	0.402346	5.35843	3.62044	0.00038372	0.00228712	-0.430037
UBTD1	0.402303	6.26438	4.43511	1.61178e-05	0.000150251	2.5405
P4HB	0.402057	8.22271	2.29093	0.0231456	0.0704455	-4.12769
MAST3	0.401762	7.30942	2.82434	0.00528118	0.021102	-2.82593
ZBTB34	0.401729	8.4447	2.10797	0.0364409	0.10101	-4.51545
MOSPD3	0.401623	7.6112	3.17895	0.00174475	0.00831032	-1.82372
CRK	0.401401	7.60681	3.61623	0.000389578	0.00231799	-0.444083
RAB7A	0.401308	5.92923	7.2382	1.33003e-11	1.12926e-09	15.9899
PTGR1	0.401169	4.61378	4.44472	1.54834e-05	0.000144999	2.57844
KCNMA1	0.401064	4.59915	3.17552	0.0017644	0.00838049	-1.83394
SLC22A16	0.400773	5.02877	3.19052	0.00168006	0.00804901	-1.78924
SLC6A12	0.400372	5.44226	4.00326	9.17595e-05	0.000668655	0.903678
SESTD1	0.399836	6.37654	2.14508	0.0333086	0.0941903	-4.43926
BICD2	0.399822	7.29379	2.72132	0.00715133	0.0271432	-3.09687
IFITM1	0.399146	12.7546	2.8378	0.0050728	0.020437	-2.78983
PSMB6	0.398899	8.93759	3.01061	0.00298821	0.0131135	-2.3128
GTDC1	0.398717	5.75189	5.74137	4.00666e-08	9.16026e-07	8.26059
COASY	0.398345	7.60313	4.26653	3.22742e-05	0.000272891	1.88534
TUBA1C	0.398297	11.5819	3.14038	0.00197755	0.00923637	-1.9379
INTS6	0.398187	6.52886	2.76363	0.0063206	0.0245364	-2.98671
OIP5	0.398145	4.30901	2.42607	0.0162665	0.0530612	-3.8218
CHST13	0.398141	6.16816	3.30785	0.00113861	0.00576975	-1.43327
MGRN1	0.397939	7.94376	2.90218	0.00417653	0.0173875	-2.6151
RLIM	0.397493	6.80564	2.77465	0.00611901	0.0238808	-2.95774
EGLN1	0.396678	6.85949	2.64341	0.00894358	0.0326209	-3.29562
LGALSL	0.396368	6.17866	2.55557	0.0114416	0.0399042	-3.51332
SPC25	0.396123	3.48172	2.17933	0.0306274	0.0883668	-4.36784
KIAA0232	0.395959	7.42949	2.76398	0.00631407	0.0245205	-2.98578
KRT8P12	0.395869	6.35781	6.58488	4.99609e-10	2.33936e-08	12.4835
AIG1	0.395481	4.91753	4.09628	6.3788e-05	0.000493098	1.24464
CLTC-IT1	0.395346	3.56041	2.81423	0.00544266	0.0216039	-2.85292
MAPK3	0.395239	8.77789	4.49116	1.27402e-05	0.000122967	2.76283
KIAA0513	0.39513	6.03227	4.54705	1.00566e-05	0.000100527	2.98669
CDS2	0.394807	6.78991	3.51227	0.000563761	0.00317001	-0.786111
FLII	0.39477	7.87688	3.66866	0.000322342	0.00197065	-0.26832
GGTLC1	0.394712	5.95749	3.9849	9.85165e-05	0.000710305	0.837136
TPM1	0.394689	5.53524	2.75613	0.0064612	0.0249875	-3.00636
CDKN2C	0.394655	6.53397	3.32051	0.00109108	0.00555229	-1.39416
TSPAN7	0.394371	4.92512	2.21248	0.028212	0.082692	-4.29768
CTDP1	0.394087	7.40305	4.31912	2.60427e-05	0.000227535	2.08754
MOB1A	0.394052	8.88694	2.58661	0.0104954	0.0372841	-3.43718
HMGB2	0.393916	7.29587	3.24415	0.00140822	0.00694005	-1.62795
JAG1	0.393774	4.95708	5.2289	4.76892e-07	7.53525e-06	5.88773
TAOK1	0.393722	7.68672	3.23834	0.00143558	0.00705448	-1.64555
MLXIP	0.393461	5.60922	3.30473	0.00115058	0.00581745	-1.44286
TTLL12	0.393296	6.29908	4.73202	4.52911e-06	5.06419e-05	3.74309
ISL2	0.39324	4.99478	3.28436	0.00123185	0.00618402	-1.50543
RAPGEF2	0.393072	6.40548	3.49384	0.000601429	0.00334323	-0.84585
DBN1	0.393027	5.99812	5.12565	7.70977e-07	1.12684e-05	5.42896
LDLR	0.39269	5.47838	5.31182	3.22753e-07	5.39557e-06	6.26096
PPAP2B	0.392638	4.55794	4.75219	4.14615e-06	4.70541e-05	3.82699
HJURP	0.392123	5.3521	3.19695	0.00164508	0.00791107	-1.77003
DHFR	0.391691	5.94602	2.60791	0.00988706	0.0354245	-3.38442
INHBB	0.391657	4.88648	3.33391	0.00104284	0.00533463	-1.35265
DEPDC1	0.391434	3.82215	3.39986	0.000833062	0.00441264	-1.14619
YPEL4	0.390771	5.02036	2.32532	0.0211883	0.0656305	-4.05141
CAPNS2	0.390403	5.21912	5.28304	3.69767e-07	6.0675e-06	6.13092
MYL12A	0.390279	7.09284	2.84231	0.00500482	0.020199	-2.77772
CDC6	0.390272	3.54119	2.94183	0.00369921	0.0157073	-2.50571
SRXN1	0.39023	9.04987	2.27915	0.0238516	0.0722717	-4.15358
TTN-AS1	0.390029	5.81225	3.21692	0.00154066	0.00748636	-1.71013
NRBP1	0.389288	7.43537	4.68327	5.60103e-06	6.08324e-05	3.54145
ANKDD1A	0.38916	5.32379	3.42784	0.000756571	0.00405838	-1.05751
KIF15	0.388873	3.64531	2.19695	0.0293218	0.0853595	-4.33066
PPP1R14B	0.387975	8.00806	3.78706	0.000208586	0.00134981	0.1365
DLEU2	0.387517	5.91946	3.19879	0.00163519	0.00787831	-1.76452
NMRK1	0.387463	6.29551	2.39817	0.0175163	0.056435	-3.8863
FMNL1	0.387419	6.99555	3.00218	0.00306797	0.0134139	-2.33665
ASF1B	0.387035	6.40907	3.65672	0.000336615	0.00204629	-0.30854
UEVLD	0.38685	5.92591	4.01428	8.79191e-05	0.00064689	0.943731
SLC43A3	0.386704	6.31666	4.02791	8.3383e-05	0.000617735	0.993372
AURKA	0.386383	4.7265	3.3786	0.000895928	0.00468622	-1.21313
LONRF3	0.386236	5.76182	3.90286	0.000134925	0.000928636	0.542964
TM9SF2	0.38619	10.4298	2.6489	0.00880511	0.0321962	-3.28179
ITGB3	0.386001	5.24913	2.62274	0.00948268	0.0341851	-3.34747
LITAF	0.385946	8.55547	3.02739	0.00283499	0.0125318	-2.26513
GLRX2	0.385593	7.45774	2.63479	0.00916493	0.033284	-3.31729
FLJ30064	0.385304	6.3816	3.78469	0.000210437	0.00136049	0.128272
PRR14	0.385262	7.28114	3.38994	0.000861846	0.00452995	-1.17745
OLR1	0.384061	2.93593	2.05506	0.041341	0.111988	-4.62186
DENND1A	0.383965	6.1163	4.05979	7.36226e-05	0.000556919	1.1101
ASGR1	0.383928	5.55777	2.57805	0.010749	0.038053	-3.45826
CSF2RB	0.383916	11.1245	2.18913	0.0298953	0.0866669	-4.3472
C5AR2	0.38377	5.69317	4.29686	2.85257e-05	0.000245662	2.00168
TGOLN2	0.383514	8.07163	2.7386	0.00680083	0.0260061	-3.05207
COX8A	0.382749	10.3396	2.77313	0.00614659	0.0239656	-2.96176
CSNK1D	0.382645	6.91706	3.31084	0.00112722	0.00571485	-1.42405
TET2	0.382418	6.05469	2.77633	0.00608895	0.0237726	-2.95334
MAPRE1	0.382264	8.78022	2.3451	0.0201297	0.0630676	-4.00705
GDI1	0.38159	8.3217	3.87941	0.000147486	0.00100528	0.459809
UFD1L	0.381101	8.9738	3.76326	0.000227851	0.00146016	0.0542302
CMTM1	0.380698	5.36748	4.58954	8.38952e-06	8.58761e-05	3.15835
CENPE	0.380619	4.05968	2.15188	0.0327609	0.0930142	-4.42517
RXRA	0.3805	8.47356	3.17582	0.00176267	0.0083772	-1.83304
PTPRE	0.380398	6.98199	3.98699	9.77261e-05	0.000705103	0.844679
STRN4	0.380284	5.90372	3.30089	0.00116551	0.0058871	-1.45468
AGPAT2	0.379944	7.10246	3.89697	0.000137981	0.000947121	0.522037
ARHGDIB	0.379943	11.0687	3.83315	0.00017559	0.0011581	0.297023
VTI1A	0.379716	5.62516	5.0834	9.36675e-07	1.32638e-05	5.24319
KPNA4	0.379668	6.88429	4.24784	3.48155e-05	0.000291087	1.81395
MOB3A	0.379444	8.19592	3.1334	0.00202261	0.00941031	-1.95841
LOC101060691	0.37944	5.28339	3.41809	0.000782433	0.00417133	-1.08847
ZNF787	0.379062	6.01718	4.71894	4.79541e-06	5.32124e-05	3.68884
LILRB4	0.379001	4.66012	4.14586	5.24173e-05	0.000414918	1.42903
MAP3K11	0.378511	6.53724	4.7588	4.02761e-06	4.59381e-05	3.85455
GALNS	0.378381	5.9069	6.40884	1.2845e-09	5.05452e-08	11.5721
LAPTM5	0.378316	12.1787	2.66717	0.00835821	0.0308599	-3.23557
POMP	0.378304	7.21162	2.54849	0.011668	0.0405351	-3.53058
POLE2	0.377931	5.65234	2.18752	0.0300143	0.0869289	-4.35059
KLHDC8B	0.377855	6.86465	2.85778	0.0047775	0.0193924	-2.73599
ATXN7L3	0.377812	7.94559	5.43018	1.83567e-07	3.34474e-06	6.80101
CAPZA2	0.377709	7.56376	2.60759	0.00989618	0.0354509	-3.38524
SH3BP5L	0.377649	6.69331	3.4478	0.00070609	0.00382354	-0.993872
NCOA1	0.377636	8.28431	3.1148	0.00214737	0.00991191	-2.0129
ORAI2	0.377574	7.08879	3.38771	0.000868459	0.00455768	-1.18448
KCND1	0.3775	5.05581	4.53997	1.03637e-05	0.000103041	2.95821
NAPA	0.377478	8.75621	2.54578	0.0117558	0.0407639	-3.53718
TAF12	0.37736	6.7978	2.33434	0.0206994	0.0644216	-4.03121
UBA1	0.377127	7.0255	4.39613	1.89572e-05	0.000173016	2.38721
PLEKHM3	0.376931	6.05411	2.48458	0.0138987	0.0466376	-3.68427
SEL1L	0.376829	6.64715	4.46567	1.4182e-05	0.000134598	2.66144
TSPAN14	0.376529	8.43424	3.3997	0.000833492	0.00441266	-1.14667
CCNDBP1	0.376472	10.9717	2.51355	0.0128444	0.0438549	-3.61505
TNFAIP3	0.376456	9.09153	2.0781	0.0391417	0.10696	-4.57583
TRAPPC10	0.375935	7.34258	2.37424	0.0186549	0.0592726	-3.94105
AKT1S1	0.375737	5.60674	2.7698	0.00620712	0.0241619	-2.97052
RNF10	0.375562	9.70508	2.15083	0.032845	0.0932013	-4.42735
SLC25A11	0.375419	7.55389	3.19325	0.00166513	0.00798873	-1.78109
ECE1	0.375027	7.30082	4.58961	8.38678e-06	8.58761e-05	3.15866
OAZ2	0.374859	8.63701	2.86592	0.00466171	0.0190243	-2.71395
DNAJC13	0.374849	4.90623	4.95091	1.71251e-06	2.21781e-05	4.66803
ARHGAP19	0.374812	6.5043	3.93939	0.000117363	0.000823834	0.673329
NLRX1	0.374404	7.23931	4.81791	3.10353e-06	3.68569e-05	4.10223
MGST2	0.374331	7.22921	3.26575	0.00131078	0.00652107	-1.56232
ASPM	0.373292	4.05666	2.35604	0.0195642	0.0615975	-3.98235
LOC729870	0.373272	6.62064	2.19484	0.0294755	0.0856838	-4.33513
LOC283914	0.373198	5.5837	4.65807	6.24726e-06	6.67528e-05	3.43786
RANBP9	0.372094	6.32769	3.30117	0.00116443	0.00588311	-1.45384
GP1BA	0.372074	6.27433	3.17578	0.00176289	0.0083772	-1.83316
ARPC4	0.37207	8.84267	4.14653	5.22786e-05	0.00041398	1.43152
CC2D2B	0.372033	6.22732	3.45859	0.000680122	0.00370617	-0.959322
SERTAD3	0.371988	6.63064	3.31645	0.00110613	0.00562187	-1.40672
HNRNPLL	0.371779	5.67072	2.99086	0.00317829	0.0138224	-2.36861
HMGB3	0.371692	5.76031	3.9963	9.42669e-05	0.000684246	0.878428
CBS	0.371536	5.30683	3.91409	0.000129277	0.000896091	0.582929
TMEM56	0.370683	3.89838	2.58415	0.0105676	0.0374886	-3.44324
ABCA1	0.369826	6.29968	2.8358	0.00510336	0.0205319	-2.79522
CEBPZOS	0.369824	5.27848	3.61672	0.000388895	0.00231593	-0.442456
GPD2	0.369729	4.92992	4.32909	2.49993e-05	0.000219789	2.1261
CYBA	0.369641	8.89482	4.12346	5.72916e-05	0.000449158	1.3455
PIK3CG	0.369416	7.04897	2.73245	0.00692362	0.0264509	-3.06803
SSH3	0.369324	7.00999	5.65868	6.0357e-08	1.30968e-06	7.86727
SEC22B	0.368954	9.48931	2.70153	0.00757289	0.0284794	-3.14787
IL18	0.368948	4.15704	2.81259	0.00546931	0.0217012	-2.8573
TRAPPC1	0.368724	9.64856	2.52424	0.0124736	0.0428245	-3.58931
CACUL1	0.368435	5.69945	5.53463	1.10809e-07	2.19282e-06	7.28461
PATL1	0.368161	6.03357	4.08468	6.67704e-05	0.000512666	1.20175
CASP4	0.368032	7.43723	2.05389	0.0414558	0.112249	-4.62419
EME1	0.367737	6.23846	3.07347	0.00245059	0.0110767	-2.13296
WDR47	0.367698	6.85534	2.04632	0.0422028	0.113926	-4.6392
TMEM115	0.367474	6.18003	4.33967	2.39366e-05	0.000211664	2.16707
RNF141	0.367261	6.22242	2.7423	0.00672771	0.0257746	-3.04243
OGDH	0.367148	5.85906	4.43169	1.63497e-05	0.000151723	2.52699
RFXANK	0.366875	7.52411	3.10617	0.00220771	0.010131	-2.0381
LOC101929741	0.36678	3.6314	4.06277	7.27668e-05	0.000551057	1.12106
AP1M1	0.366609	7.64769	3.05108	0.00263093	0.0117542	-2.1974
UBE2B	0.366518	7.84106	4.86156	2.55658e-06	3.11039e-05	4.28661
UBE2L3	0.366212	8.20869	2.73043	0.00696445	0.0265771	-3.07327
KDM3B	0.366181	8.10545	2.51397	0.0128297	0.0438293	-3.61405
PTPRJ	0.366157	6.18521	4.56072	9.48816e-06	9.57862e-05	3.04178
SDHC	0.365167	6.82023	3.23568	0.00144826	0.00710993	-1.65359
GNAI3	0.364975	8.43832	2.15348	0.0326329	0.0927668	-4.42184
CYP1B1-AS1	0.364892	4.43834	3.80369	0.000196055	0.00127761	0.194231
FAM49A	0.364781	7.42411	2.33598	0.0206119	0.0642342	-4.02755
ARHGEF11	0.364549	5.58474	5.28008	3.74962e-07	6.13307e-06	6.11758
IQCE	0.364484	5.82581	4.53515	1.05778e-05	0.000104866	2.93885
SAP30	0.364225	5.589	3.48278	0.00062515	0.00345725	-0.881562
FAM134A	0.364139	8.47647	3.67927	0.000310142	0.00190346	-0.232491
TOX4	0.364073	7.0705	5.00755	1.32493e-06	1.77775e-05	4.91252
SPAG5	0.363767	5.50605	3.70578	0.00028154	0.00175369	-0.142593
WWC3	0.363695	8.07237	2.84694	0.00493569	0.0199663	-2.76524
CHMP4C	0.363567	3.36606	3.01818	0.00291811	0.0128465	-2.29131
C1GALT1C1	0.363323	6.51249	2.31369	0.0218332	0.0672311	-4.07732
MAP4K4	0.363143	7.23033	2.64427	0.00892172	0.0325697	-3.29345
ATF6	0.362924	7.7684	2.48424	0.0139119	0.046674	-3.68509
REL	0.362016	6.70055	2.2852	0.0234866	0.0713391	-4.1403
VLDLR	0.361919	3.56683	3.40556	0.000816914	0.00433611	-1.12818
TST	0.361699	7.47797	2.62571	0.00940353	0.0339345	-3.34005
PACSIN2	0.361521	7.31558	3.43273	0.000743907	0.00400258	-1.04196
TM9SF1	0.361383	5.47816	4.56717	9.23091e-06	9.35527e-05	3.06782
CDCA2	0.361327	4.42149	3.26208	0.00132687	0.0065883	-1.57349
NEK2	0.36073	3.93484	3.16997	0.00179655	0.00850357	-1.85041
TMEM167A	0.359929	9.26354	1.99668	0.0473918	0.124848	-4.73631
AP1G1	0.359639	7.38609	3.42043	0.000776155	0.00414341	-1.08105
VCP	0.359414	8.02592	3.63656	0.000362074	0.00217653	-0.37619
STS	0.359393	4.78048	4.65073	6.44873e-06	6.86902e-05	3.40776
LOC728175	0.359296	4.19858	5.29777	3.4493e-07	5.7011e-06	6.19741
PSMC1	0.359265	9.33843	3.83696	0.000173093	0.00114623	0.31038
ZBTB47	0.359166	6.19094	5.95563	1.36187e-08	3.63239e-07	9.29767
LINC00672	0.359057	5.59535	2.51355	0.0128443	0.0438549	-3.61505
ANPEP	0.358953	5.51124	4.22984	3.74419e-05	0.000310302	1.74547
C15orf37	0.358274	6.23656	2.83293	0.00514731	0.0206761	-2.80291
RMI1	0.358227	7.04248	1.98663	0.0485058	0.127247	-4.75569
SIPA1	0.35812	7.99802	2.79849	0.00570295	0.0224848	-2.89476
MAP1S	0.357935	6.66907	2.74044	0.00676445	0.0258912	-3.04729
TOR1A	0.357915	6.91609	4.90238	2.13019e-06	2.6643e-05	4.46023
TUBA1B	0.357636	10.2837	3.29364	0.00119418	0.00601413	-1.47697
FOXP1-IT1	0.357265	5.93085	2.79023	0.00584417	0.0229209	-2.91665
KLF14	0.356957	4.89329	4.53207	1.07168e-05	0.000105884	2.92649
INSL3	0.356556	5.43591	4.50063	1.22418e-05	0.000118942	2.80059
DGAT1	0.356501	7.0669	3.09587	0.0022817	0.0104075	-2.06808
NOTCH2	0.356411	8.29412	3.05325	0.00261289	0.0116761	-2.19116
PLSCR4	0.355567	3.50229	2.52702	0.0123788	0.0425595	-3.58261
NUDT16P1	0.355214	5.16298	2.94032	0.00371641	0.015777	-2.5099
FGFR1OP2	0.35518	6.75043	2.86666	0.00465139	0.0189936	-2.71196
TRPC4AP	0.354821	7.0055	4.75109	4.16627e-06	4.72301e-05	3.82239
LEPROT	0.354399	7.1303	2.88537	0.00439538	0.0180999	-2.66106
COPS7A	0.354321	7.33088	3.17624	0.00176025	0.00837048	-1.83179
ASAH1	0.353837	8.81888	2.90843	0.00409782	0.0170982	-2.59796
BRE	0.353702	7.83256	4.28412	3.00457e-05	0.000256592	1.95275
PRMT5	0.353601	6.54909	3.18254	0.00172446	0.00823282	-1.81305
MYL6	0.352392	9.49918	4.27395	3.13159e-05	0.000265666	1.91374
RAB8B	0.352055	8.37554	1.98144	0.049089	0.128431	-4.76566
PDE2A	0.35169	5.91585	2.3953	0.0176492	0.0568095	-3.89288
RFWD2	0.351498	8.43703	2.50898	0.0130059	0.0442879	-3.62602
CTAGE5	0.351076	5.75073	4.20159	4.19519e-05	0.000341727	1.63844
ARSD	0.351069	5.87251	5.21449	5.10154e-07	7.96852e-06	5.82331
SLC43A2	0.351063	6.43645	3.35933	0.00095673	0.00496868	-1.27349
ITGAX	0.350497	6.48176	4.05622	7.46583e-05	0.000563504	1.09699
VDR	0.350391	5.99373	5.20157	5.41907e-07	8.375e-06	5.76562
NT5C2	0.35031	9.37688	2.38636	0.0180702	0.0578281	-3.91338
NECAB1	0.350305	2.95298	2.86059	0.00473728	0.0192597	-2.7284
RSBN1	0.350296	8.47604	2.45529	0.0150428	0.0498955	-3.75351
FAM106A	0.350221	4.61625	3.01074	0.00298694	0.0131135	-2.31241
LINC01352	0.349877	3.84153	4.3381	2.40919e-05	0.000212691	2.16098
DDX60L	0.349818	6.76839	2.15571	0.0324555	0.0924164	-4.41721
CDCA8	0.349806	6.40698	4.01237	8.85763e-05	0.000650842	0.936754
KIDINS220	0.349742	5.81541	4.15636	5.02715e-05	0.000400099	1.46832
LOC100506299	0.349738	5.86322	5.08731	9.19987e-07	1.30664e-05	5.26034
PELO	0.349709	4.12741	5.19618	5.55697e-07	8.54938e-06	5.74161
SLC44A2	0.349634	8.47658	2.72389	0.00709822	0.0269761	-3.09023
CSDC2	0.348823	5.55428	3.83479	0.000174508	0.00115335	0.30279
CDC37	0.348544	8.24405	2.95828	0.00351635	0.0150558	-2.45996
FBXL20	0.348267	5.93953	3.09789	0.00226698	0.0103542	-2.06219
ANKRD13D	0.3481	6.75703	4.10906	6.06502e-05	0.000472231	1.292
HINT3	0.348056	4.83784	4.27631	3.10163e-05	0.000263452	1.92279
SH3PXD2B	0.347944	5.80449	4.2273	3.78275e-05	0.000312738	1.73583
CCNE2	0.347933	4.51749	2.69684	0.00767604	0.0287932	-3.1599
MAK	0.347718	5.18843	2.38535	0.0181181	0.0579361	-3.91568
ARHGAP9	0.347567	9.48856	2.08769	0.0382566	0.105032	-4.55654
FHL3	0.347291	6.9653	4.0258	8.40675e-05	0.000622355	0.98571
MAS1	0.346493	4.3835	3.79997	0.000198795	0.0012934	0.181298
ATP6V0A1	0.346094	7.3783	4.86397	2.52921e-06	3.08602e-05	4.29685
TRIM27	0.345923	8.28688	2.51819	0.0126822	0.0434479	-3.60389
TBC1D20	0.345641	6.72527	4.01037	8.92643e-05	0.000654904	0.929505
GHITM	0.344737	9.36174	3.06591	0.0025102	0.0112889	-2.15477
TFDP1	0.344488	6.82021	2.67014	0.00828764	0.0306768	-3.22804
MROH6	0.344081	7.019	3.97026	0.000104242	0.000745806	0.78425
PTPN12	0.34399	5.4223	2.48779	0.0137784	0.0463251	-3.67665
PSME3	0.343916	7.03757	2.92635	0.00387929	0.0163062	-2.54858
ABCA13	0.343745	2.70673	2.68682	0.00790052	0.029527	-3.18554
PRR11	0.343643	8.46845	2.497	0.0134378	0.0454035	-3.65469
LOC646214	0.34351	7.01622	3.90703	0.0001328	0.000917349	0.557798
NETO2	0.342852	4.98512	2.72126	0.00715257	0.0271432	-3.09702
EDEM3	0.342804	8.11747	1.99461	0.0476195	0.125283	-4.74031
PEF1	0.342789	8.31444	2.6647	0.00841751	0.0310732	-3.24185
IKBKG	0.342583	8.11369	5.56935	9.35644e-08	1.91114e-06	7.44678
ANKRD33B	0.342536	6.22163	3.46635	0.000662016	0.00362779	-0.934434
TPRG1L	0.3425	8.90734	3.09085	0.00231861	0.01055	-2.08266
ABR	0.342031	7.24059	3.58919	0.000429226	0.00251272	-0.533888
ARF4	0.342015	9.29421	3.03859	0.00273674	0.0121579	-2.23316
MFSD11	0.341785	6.95045	3.57466	0.000452051	0.00262631	-0.581867
LHFPL5	0.341652	3.77328	5.29912	3.42734e-07	5.66938e-06	6.20352
SH2D3C	0.341169	7.15681	2.50283	0.0132261	0.044866	-3.64076
TMEM208	0.340782	7.75606	2.93671	0.00375796	0.0159006	-2.51993
BTBD10	0.340527	7.14928	2.24352	0.0261022	0.0777582	-4.23109
RAC1	0.340052	7.99697	3.04532	0.00267927	0.0119441	-2.21392
TOP1	0.339943	8.4201	3.61151	0.000396243	0.0023474	-0.459806
ERLIN2	0.339175	5.54393	2.51677	0.0127318	0.0435651	-3.60732
NDRG1	0.339082	8.35685	3.06835	0.00249079	0.0112138	-2.14773
SPATA1	0.339004	3.18961	3.59872	0.000414835	0.00244104	-0.502298
PPP4R2	0.338828	6.97317	2.26166	0.0249339	0.0749851	-4.19176
PSEN1	0.338562	5.99262	4.80063	3.35002e-06	3.92826e-05	4.02958
FBXW2	0.338498	5.34495	3.45447	0.000689937	0.00374885	-0.972535
SELL	0.338313	12.6318	3.09896	0.00225928	0.0103237	-2.0591
PEX6	0.338211	5.42404	2.91689	0.00399324	0.0167061	-2.57468
ZNF282	0.338036	6.45117	3.73642	0.000251589	0.00159529	-0.038001
HIST1H2BO	0.337893	3.27016	3.66838	0.000322672	0.00197208	-0.26927
PROSC	0.337392	6.48731	3.78825	0.000207662	0.00134467	0.140639
CHST15	0.336828	7.62277	2.77018	0.00620002	0.0241417	-2.9695
CDC45	0.336797	5.33949	2.6483	0.00882023	0.0322343	-3.28331
TMCO6	0.336531	6.4782	2.74714	0.00663336	0.0254606	-3.02983
WDFY3-AS2	0.336	3.59344	6.12278	5.77055e-09	1.78095e-07	10.1241
DAP	0.335379	8.0212	3.20137	0.0016214	0.00782479	-1.75679
STK40	0.33519	7.46575	3.53989	0.000511441	0.00291426	-0.696082
MIR3916	0.334984	4.8734	2.10627	0.0365902	0.101327	-4.51891
GRK6	0.334885	8.77455	4.02834	8.32428e-05	0.000617143	0.994949
SNORA68	0.334711	5.43172	3.55737	0.000480726	0.00276591	-0.63879
COL6A3	0.334601	4.76555	2.52249	0.0125337	0.0430166	-3.59354
TRIP13	0.334353	5.37794	2.47917	0.0141042	0.0472339	-3.69712
LOC646014	0.334289	6.95888	3.30299	0.00115733	0.00585014	-1.44823
AGPAT1	0.333878	7.58097	3.62161	0.00038212	0.00227824	-0.426161
INSC	0.33346	4.11164	3.11736	0.00212982	0.00984647	-2.00543
FOXN2	0.33343	7.04433	2.57341	0.010889	0.0384487	-3.46967
ZNF746	0.333268	6.32171	3.42678	0.000759356	0.00406859	-1.0609
CDCA3	0.332514	6.31488	3.39515	0.000846599	0.00446532	-1.16103
C19orf54	0.332241	5.99799	3.43049	0.000749675	0.00402726	-1.04908
TREML4	0.33223	4.62815	3.18106	0.00173279	0.00826489	-1.81745
C5	0.332038	4.98907	2.60313	0.0100207	0.0358657	-3.39629
FGD3	0.331802	8.29818	2.25523	0.0253426	0.0759796	-4.20573
BACH1	0.331639	6.55032	4.50145	1.21996e-05	0.000118588	2.80386
PLK1	0.330896	5.27325	3.30031	0.00116779	0.00589716	-1.45648
DLC1	0.330626	4.17934	3.39095	0.000858877	0.00451783	-1.17428
UHRF1BP1L	0.330393	4.55138	4.1964	4.28347e-05	0.000347949	1.61885
LOC100129603	0.330185	4.65574	3.95096	0.000112273	0.000794097	0.714805
CDADC1	0.329794	4.77229	3.39307	0.00085268	0.00449313	-1.16761
C9orf89	0.329637	6.10191	5.04306	1.12688e-06	1.54962e-05	5.06686
TGFBR1	0.32959	7.49753	2.60542	0.00995652	0.0356421	-3.39061
LOC100130357	0.329496	4.97161	3.3048	0.00115033	0.00581745	-1.44267
MMP27	0.329481	3.9549	3.41368	0.000794409	0.00422652	-1.10246
KIAA0040	0.329469	7.94293	2.53261	0.0121903	0.0420211	-3.56911
DLGAP1-AS1	0.329352	6.0818	3.60901	0.000399816	0.0023631	-0.468126
OSBPL1A	0.329208	5.32105	2.68671	0.00790301	0.029527	-3.18582
RNF167	0.328979	8.53502	4.32263	2.56714e-05	0.00022506	2.10108
NTSR1	0.328842	6.06089	2.94578	0.00365458	0.0155371	-2.49476
TMEM92	0.328809	5.41847	4.00902	8.97345e-05	0.000657411	0.924583
WASF2	0.32862	8.46642	3.92163	0.000125613	0.0008742	0.609801
STAC3	0.328581	5.60145	3.90308	0.000134812	0.000928371	0.543745
SEMA4B	0.32834	8.46307	3.10697	0.00220205	0.0101096	-2.03577
SPATA2	0.328249	5.63032	4.05269	7.56961e-05	0.000569446	1.08405
STAB1	0.328109	5.77311	3.61424	0.000392374	0.00233055	-0.450711
TUBB4B	0.327468	8.27714	2.21541	0.0280066	0.0821489	-4.29143
WDR26	0.327402	7.63154	2.38395	0.0181854	0.0580786	-3.9189
RHOA	0.32724	8.48802	3.11333	0.00215759	0.00995011	-2.01722
AIM1	0.327148	9.01192	2.08523	0.0384821	0.105496	-4.5615
CDK19	0.327126	6.87708	2.89546	0.00426278	0.0176819	-2.6335
DHRS1	0.326597	7.17913	2.37112	0.0188084	0.059677	-3.94817
WDR1	0.326508	8.03713	3.2721	0.00128332	0.0064047	-1.54293
NAA38	0.326334	8.56825	2.36722	0.0190011	0.0601705	-3.95702
NCAPH	0.326233	5.49284	3.09931	0.00225676	0.0103167	-2.05808
GCNT1	0.326217	5.84648	3.33982	0.0010222	0.0052461	-1.33429
TMEM59	0.32606	7.98939	2.57234	0.0109215	0.0385236	-3.4723
RNF181	0.325795	9.80241	2.83143	0.00517047	0.0207488	-2.80693
WWP2	0.325697	6.29043	4.44937	1.51851e-05	0.000142793	2.59683
ENSA	0.325511	6.87895	4.20836	4.08255e-05	0.000334149	1.66405
BCAP31	0.325404	9.26668	2.4396	0.0156892	0.0516046	-3.79027
TMTC2	0.325383	4.56845	3.28164	0.0012431	0.00623135	-1.51376
XXYLT1	0.325058	5.70018	4.31255	2.67536e-05	0.000232692	2.06214
NUP98	0.324604	6.86332	3.62292	0.000380315	0.00226881	-0.421772
HIPK3	0.324594	6.21807	2.89681	0.00424536	0.0176276	-2.62981
LASP1	0.324552	10.2414	2.81591	0.0054155	0.0215253	-2.84844
C4orf3	0.324536	9.05659	2.31379	0.0218276	0.067224	-4.0771
SUPT4H1	0.324108	8.39135	3.5671	0.000464387	0.00268275	-0.606789
REG1P	0.323569	4.90697	2.68945	0.00784098	0.0293581	-3.17881
DUSP18	0.323388	7.68646	3.87012	0.000152764	0.00103512	0.426981
LOXL1	0.323115	4.23342	3.13429	0.00201678	0.00939174	-1.95579
BRAF	0.322992	6.12194	3.31994	0.00109319	0.00556024	-1.39593
DESI1	0.322422	7.05976	4.01993	8.60114e-05	0.000635366	0.964288
GAPVD1	0.322391	7.21506	3.74524	0.000243534	0.00155046	-0.00772464
RNASE1	0.321762	4.70735	3.28206	0.00124135	0.0062241	-1.51247
CEL	0.321737	3.97812	3.72518	0.000262202	0.00165082	-0.0764343
MSS51	0.321577	4.63812	2.71364	0.00731238	0.027642	-3.11671
WIPF2	0.321344	7.12468	3.04258	0.00270248	0.0120292	-2.22174
IQSEC1	0.32128	8.64439	2.98856	0.00320109	0.0139038	-2.37507
RNF130	0.320972	6.12982	5.58601	8.62507e-08	1.79538e-06	7.52483
NLRP6	0.320914	4.25481	2.56938	0.0110116	0.038788	-3.47955
ARPC3	0.320753	10.78	2.38962	0.0179156	0.0574681	-3.90591
SDCBP	0.320545	12.5333	3.18673	0.00170102	0.0081361	-1.80056
KPNA1	0.320302	6.97288	2.96053	0.00349194	0.0149669	-2.45366
TANC2	0.320201	4.55427	3.83844	0.000172131	0.00114059	0.315583
ADAMTSL4	0.32005	5.72955	3.06141	0.00254628	0.0114284	-2.16773
TP53BP2	0.319835	6.18972	2.5082	0.0130336	0.0443601	-3.62789
ST3GAL4	0.319749	4.96553	4.10563	6.14779e-05	0.000477586	1.27927
TMTC1	0.319684	3.95318	2.78719	0.00589699	0.0230981	-2.9247
SULT1A2	0.319562	8.2621	2.3076	0.0221779	0.0680527	-4.09085
AKIRIN1	0.319277	7.49837	2.85943	0.00475376	0.0193152	-2.73152
SLC16A1	0.31925	4.83845	2.08857	0.0381766	0.104883	-4.55477
YKT6	0.318982	6.2574	3.26007	0.00133576	0.00662281	-1.5796
CHD8	0.318843	7.20958	2.21552	0.0279987	0.0821489	-4.29119
GPSM2	0.318638	4.72851	4.19246	4.35173e-05	0.000352514	1.60398
ARL8B	0.318615	8.64876	2.11792	0.0355771	0.0991932	-4.49514
HIPK2	0.318536	6.26728	4.47033	1.39075e-05	0.000132299	2.67992
COPB2	0.318183	5.71147	3.5945	0.000421154	0.00247349	-0.516302
UBN1	0.318058	8.19189	2.43859	0.0157318	0.0516866	-3.79264
GNMT	0.317515	4.89962	3.96192	0.000107641	0.000766101	0.754227
SHC1	0.317326	7.0624	3.47051	0.000652499	0.00358428	-0.921075
FGF13-AS1	0.316921	3.64548	2.8663	0.00465636	0.0190063	-2.71292
ZFYVE1	0.316759	6.93439	4.53389	1.06346e-05	0.000105275	2.93378
DOCK5	0.316444	5.97456	3.27955	0.00125183	0.00627203	-1.52017
KPNA6	0.316392	6.25074	4.68285	5.61114e-06	6.09099e-05	3.53974
LOC440149	0.315784	5.24716	3.87735	0.00014864	0.00101147	0.45253
TEX2	0.315482	6.08444	2.9872	0.00321475	0.0139513	-2.37892
ZNFX1	0.315061	8.88354	2.56159	0.0112523	0.0394119	-3.49862
THBS3	0.315049	7.0392	4.04093	7.92535e-05	0.000593155	1.04099
CD300A	0.314966	8.02787	2.96172	0.0034791	0.0149244	-2.45034
ITPRIPL2	0.31489	5.4358	3.82118	0.000183649	0.0012052	0.255173
TMEM169	0.314857	5.30352	3.52438	0.000540227	0.00305954	-0.746706
UQCRC1	0.314488	8.70412	2.01334	0.0455932	0.121097	-4.70397
FOSL1	0.313915	4.78715	3.60425	0.000406694	0.00239889	-0.483932
KCTD20	0.313737	7.10724	3.43238	0.000744791	0.00400523	-1.04305
GPS2	0.313671	7.89274	3.83919	0.000171649	0.00113813	0.318198
FAH	0.313447	4.93271	3.51884	0.000550873	0.00310865	-0.764742
MRVI1-AS1	0.313246	6.97546	3.17151	0.00178759	0.00847488	-1.84585
DNM2	0.313036	6.04341	5.3671	2.48227e-07	4.32274e-06	6.51214
KIAA0556	0.313005	6.30268	2.98693	0.00321739	0.0139598	-2.37966
MXRA7	0.312889	5.74861	2.95518	0.00355017	0.0151784	-2.4686
PLTP	0.312804	4.99914	2.86865	0.00462354	0.0188987	-2.70656
LINC00202-2	0.312355	5.97331	5.98744	1.15784e-08	3.18437e-07	9.4538
YWHAG	0.311788	9.39629	2.41038	0.0169589	0.0549158	-3.85814
HCFC1R1	0.311655	7.51124	3.35544	0.000969478	0.00501579	-1.28565
OXSR1	0.311288	8.0585	3.02633	0.00284441	0.012559	-2.26813
RRAS	0.311275	6.47057	2.31736	0.021628	0.0666896	-4.06916
ARHGAP27	0.31121	5.73787	4.36034	2.19829e-05	0.000196511	2.24741
ATP2C2	0.311196	5.58425	3.80444	0.000195505	0.00127443	0.196849
TM9SF4	0.311078	6.96444	2.681	0.00803359	0.029877	-3.20038
RC3H1	0.311017	7.55529	2.3205	0.0214534	0.0662612	-4.06216
HCLS1	0.310749	11.4373	2.16836	0.0314652	0.090275	-4.39083
LRRK1	0.310422	5.20693	4.88748	2.2772e-06	2.81207e-05	4.39672
SLC15A4	0.31016	7.38897	2.54697	0.011717	0.0406707	-3.53427
MYO10	0.30993	3.81779	4.88363	2.31672e-06	2.85399e-05	4.38034
TOMM40L	0.309565	6.31715	2.86062	0.00473686	0.0192597	-2.72831
ID1	0.309557	3.77919	2.76488	0.00629735	0.0244695	-2.98341
KPNB1	0.309539	9.11625	2.22186	0.0275594	0.0811045	-4.27765
MBOAT1	0.30949	7.29462	2.03831	0.0430061	0.11553	-4.65503
POLR2J	0.309226	10.0581	3.41695	0.00078552	0.00418467	-1.0921
ZNF630	0.3091	4.44887	3.57023	0.000459242	0.00265978	-0.596476
TMEM72-AS1	0.309094	5.58488	4.63559	6.88407e-06	7.26841e-05	3.34581
SGSH	0.30857	7.0688	2.45945	0.0148753	0.0494201	-3.74371
FAM209B	0.308341	5.82667	3.61575	0.000390254	0.00232133	-0.445689
NIT1	0.30826	5.8592	4.11741	5.86801e-05	0.000457938	1.323
POLQ	0.30793	5.16172	3.03543	0.00276417	0.0122718	-2.2422
SDCBP2-AS1	0.307688	5.65951	4.00695	9.04581e-05	0.000661291	0.917059
RBM42	0.307631	7.24569	2.54875	0.0116597	0.0405129	-3.52995
SCN1B	0.307603	6.01781	3.127	0.00206478	0.00958475	-1.9772
SLC36A4	0.307509	4.91241	2.62683	0.00937385	0.0338562	-3.33725
TROAP	0.30738	5.8254	3.84481	0.000168061	0.00111942	0.337907
FBXW5	0.307186	7.37033	3.63557	0.000363366	0.00218169	-0.379494
BUB1	0.306937	4.33471	4.00372	9.15958e-05	0.000667938	0.905351
SZRD1	0.306872	7.38556	4.93913	1.80591e-06	2.31304e-05	4.61746
FBXO30	0.306674	6.44959	2.45915	0.0148871	0.0494514	-3.74441
CD33	0.306653	7.05619	2.42669	0.0162393	0.0530051	-3.82035
TPI1	0.306568	8.37222	3.31942	0.00109513	0.00556872	-1.39755
STIM1	0.306269	6.87943	3.56501	0.000467861	0.00270055	-0.613687
TK2	0.306096	5.64865	3.9082	0.000132213	0.000913659	0.561938
RAB43	0.305574	6.50474	3.906	0.000133321	0.000920076	0.554136
TUBBP5	0.305476	4.31256	2.10922	0.0363311	0.100817	-4.5129
SPACA6P	0.305222	4.71989	4.19968	4.22751e-05	0.000343949	1.63122
ACOT8	0.304825	5.99339	4.6359	6.87463e-06	7.26669e-05	3.34711
NUP214	0.304691	7.43134	4.29119	2.9193e-05	0.000250355	1.97988
SYAP1	0.304345	7.26731	3.47127	0.000650765	0.00357667	-0.91862
FOXO4	0.304335	6.51122	2.03254	0.0435923	0.116859	-4.66639
BCKDHA	0.304284	7.52048	3.74358	0.000245031	0.00155757	-0.0134296
LOC100506113	0.304154	4.7693	3.55313	0.000488016	0.00280106	-0.652715
SEC24A	0.304119	5.87404	2.0815	0.0388263	0.106269	-4.56901
FTL	0.303871	13.4767	4.66256	6.12716e-06	6.57097e-05	3.45627
EIF1B	0.303129	6.8279	4.21389	3.99287e-05	0.000327833	1.68495
AUNIP	0.30311	5.14124	4.78272	3.6255e-06	4.20073e-05	3.95448
CNTD2	0.303104	7.09386	3.656	0.000337497	0.00205044	-0.31097
DHRS12	0.302644	6.08116	3.39998	0.000832712	0.00441195	-1.14581
MGAT1	0.30225	9.03488	3.215	0.00155042	0.00752304	-1.7159
ASPHD2	0.301876	6.44368	1.99548	0.0475233	0.125113	-4.73862
ATF7	0.301677	5.48471	6.45598	9.98935e-10	4.08804e-08	11.8147
PHF12	0.301609	5.03425	2.78381	0.00595599	0.0232935	-2.9336
ARHGEF2	0.301251	7.18648	4.30597	2.74825e-05	0.000238081	2.0368
OR7E37P	0.301133	7.61814	3.72272	0.000264589	0.00166227	-0.084862
STAC	0.301005	6.22346	3.09997	0.00225193	0.0103022	-2.05614
ARAP1	0.300577	7.18873	3.94177	0.000116298	0.000817483	0.681852
LOC142937	0.30029	4.68591	2.68287	0.00799069	0.0297608	-3.19563
ARID3B	0.300172	6.8754	4.78015	3.66682e-06	4.23183e-05	3.94371
CNPY3	0.299902	7.46872	2.52542	0.0124336	0.042723	-3.58649
CDC25A	0.299731	4.65111	2.72383	0.00709932	0.0269761	-3.09037
PRO1082	0.299421	4.65235	1.99789	0.0472584	0.124598	-4.73396
LMNTD1	0.299336	5.37459	3.26051	0.0013338	0.00661917	-1.57826
TXNDC17	0.298928	7.56061	3.41256	0.000797489	0.0042396	-1.10602
RALBP1	0.298744	7.87657	3.05652	0.00258601	0.0115737	-2.18178
NANS	0.298568	6.466	4.14477	5.26455e-05	0.000416563	1.42495
METTL22	0.298299	6.52528	6.23231	3.26201e-09	1.10144e-07	10.6736
DCTN2	0.298147	6.30528	6.38657	1.44601e-09	5.51544e-08	11.4579
LETM2	0.298088	4.61105	2.95907	0.00350773	0.0150251	-2.45774
RELB	0.297635	6.67418	2.73171	0.00693852	0.0264881	-3.06995
PSRC1	0.29763	5.56062	3.41899	0.000780022	0.00416079	-1.08563
LOC101930114	0.297528	5.23937	3.2622	0.00132635	0.00658731	-1.57313
ABCD1	0.297526	6.4412	3.40017	0.000832158	0.00441166	-1.1452
FIBP	0.297465	8.32674	2.08677	0.0383409	0.105236	-4.5584
PPFIA1	0.297182	6.18565	3.49498	0.000599019	0.00333409	-0.842143
SLC3A2	0.297179	7.21175	3.75617	0.000233905	0.00149474	0.0298204
PDE6H	0.29717	3.19266	4.2145	3.983e-05	0.000327178	1.68728
STAG3	0.297038	6.70226	2.82776	0.00522741	0.020924	-2.81675
RFNG	0.296856	6.34801	3.3904	0.000860503	0.00452405	-1.17602
KRTAP9-4	0.296722	3.99209	3.86836	0.000153782	0.00104028	0.420776
MED8	0.296698	6.64043	3.75394	0.00023584	0.00150523	0.0221489
TTC8	0.296683	4.30312	2.74437	0.00668717	0.0256385	-3.03704
CCDC71L	0.296636	5.97754	2.88849	0.00435399	0.0179819	-2.65255
PPARG	0.296541	4.21201	2.85633	0.00479834	0.0194616	-2.7399
RNF208	0.296426	5.84754	2.95244	0.00358027	0.0152751	-2.47622
HIATL2	0.296422	6.70245	3.38572	0.000874399	0.00458416	-1.19075
EGR1	0.296201	4.73977	3.14965	0.00191911	0.00899835	-1.91057
ATP6V1E1	0.296191	9.7535	2.96922	0.00339931	0.0146251	-2.42938
XRCC4	0.296119	4.3966	2.60815	0.0098806	0.0354075	-3.38384
TSG101	0.296099	9.24816	3.35497	0.000971002	0.00501987	-1.28709
CLTC	0.29592	5.67364	3.99565	9.45069e-05	0.000685502	0.876046
ADAMDEC1	0.295805	3.51028	2.39256	0.0177773	0.0571277	-3.89917
MARK3	0.295694	6.30148	3.24782	0.00139121	0.00686281	-1.61683
TTPAL	0.295291	6.7726	3.1476	0.00193189	0.00904585	-1.91662
VPS37B	0.29475	7.45413	2.05467	0.0413798	0.112058	-4.62265
MPST	0.294645	7.99122	2.72098	0.00715846	0.0271554	-3.09776
FAM160B1	0.294203	6.15998	3.13826	0.0019911	0.00928909	-1.94412
TOLLIP	0.294087	6.35019	3.96032	0.000108307	0.00077031	0.748449
TMEM2	0.294035	7.14023	2.25243	0.0255229	0.0764418	-4.21182
DAGLB	0.293984	5.9006	2.91512	0.00401487	0.0167863	-2.57954
CDC42	0.29387	8.17215	3.02781	0.00283123	0.0125205	-2.26392
HSBP1	0.293529	8.30584	2.33245	0.0208011	0.064676	-4.03546
CLCN3	0.293397	6.65074	2.67873	0.00808608	0.0300613	-3.20617
STAU1	0.293124	8.80116	3.15015	0.00191598	0.00898572	-1.90908
SNX21	0.293022	5.61771	3.55661	0.000482027	0.00277213	-0.64129
ROMO1	0.292899	6.96859	1.97803	0.0494764	0.129263	-4.7722
CNOT3	0.292222	4.48447	3.7733	0.000219524	0.0014121	0.0888967
UVSSA	0.292088	6.12029	3.92375	0.000124601	0.000868388	0.617366
NR6A1	0.291974	5.39358	5.26498	4.0259e-07	6.49157e-06	6.04961
TBC1D7	0.291839	5.21322	4.29008	2.93247e-05	0.000251199	1.97564
ALDH3B1	0.291794	7.16833	3.16714	0.00181321	0.00857648	-1.85883
PVRL2	0.291551	5.9769	2.88915	0.00434534	0.0179589	-2.65076
IP6K1	0.291464	7.20188	3.80243	0.000196982	0.00128323	0.189838
ACOX2	0.291389	4.53616	2.92455	0.00390071	0.0163827	-2.55355
ZC3H3	0.291378	4.93338	3.69051	0.000297694	0.00183698	-0.194439
PDXK	0.291099	7.00701	4.68996	5.4407e-06	5.92484e-05	3.56901
PDLIM5	0.290887	5.25799	4.85429	2.64062e-06	3.18963e-05	4.25584
LHFP	0.290784	4.15332	3.60883	0.000400065	0.00236388	-0.468703
CATSPER1	0.290179	6.19461	2.82021	0.00534655	0.0212884	-2.83696
CDK1	0.290164	4.76828	2.0854	0.0384663	0.105475	-4.56115
NCOA2	0.290106	6.66141	2.9209	0.00394455	0.0165396	-2.56362
CACNA1E	0.289979	4.43063	4.68489	5.56174e-06	6.04378e-05	3.54813
LOC101928988	0.28985	3.84451	2.97295	0.0033602	0.0144903	-2.41892
TOR4A	0.289522	5.95388	3.59431	0.000421425	0.00247374	-0.5169
ATP6V1D	0.289427	6.69793	3.3396	0.00102296	0.00524871	-1.33498
CLIC4	0.289261	6.51574	2.70752	0.0074429	0.0280524	-3.13246
MLX	0.289019	7.96854	4.29454	2.8796e-05	0.000247573	1.99279
C16orf93	0.288662	5.18461	3.69135	0.000296784	0.00183357	-0.191595
MIEN1	0.288638	8.92487	4.01455	8.78263e-05	0.00064644	0.944721
HPCAL1	0.288489	8.33455	2.24228	0.0261839	0.0779308	-4.23377
FRMD4B	0.288366	4.50008	4.15379	5.07907e-05	0.00040376	1.45866
LGSN	0.288309	3.1472	2.9352	0.00377539	0.0159579	-2.5241
STARD10	0.288222	6.1082	2.50526	0.0131385	0.0446429	-3.63493
ARF5	0.288098	8.79051	3.07275	0.0024562	0.0110971	-2.13503
DIP2B	0.287826	6.09474	2.60919	0.00985156	0.0353406	-3.38124
STRADA	0.287806	7.02459	4.53247	1.06986e-05	0.000105807	2.9281
C11orf71	0.287681	6.70635	3.58687	0.000432787	0.00253092	-0.541541
CRISP2	0.287638	4.08014	2.012	0.0457349	0.121378	-4.70657
SNX20	0.28763	6.96762	2.22308	0.0274758	0.0809283	-4.27505
RNF185	0.287599	7.40027	3.39629	0.00084332	0.00445317	-1.15746
BAMBI	0.28757	4.93258	3.00165	0.00307309	0.0134333	-2.33815
NSUN3	0.287473	5.23774	3.09204	0.00230978	0.0105145	-2.0792
PARP4	0.287445	8.91244	1.99577	0.0474915	0.125067	-4.73806
TTC1	0.287324	7.98424	3.83608	0.000173666	0.00114927	0.307302
GABARAP	0.286956	11.9547	4.14979	5.16047e-05	0.000409118	1.44372
COPG1	0.286231	6.18867	2.58755	0.0104677	0.0372051	-3.43485
MARK4	0.286154	6.70164	3.43828	0.000729763	0.00393787	-1.02427
WAS	0.286122	9.34752	2.71866	0.00720665	0.0273079	-3.10373
CAT	0.286044	8.94934	2.35259	0.0197409	0.0620395	-3.99015
BAD	0.285857	6.37888	4.35263	2.26928e-05	0.000202063	2.21742
LOC344887	0.285607	3.89745	3.08588	0.00235562	0.0106994	-2.09705
EP300	0.285581	6.08007	2.18855	0.0299382	0.0867453	-4.34843
INSR	0.285498	4.99667	4.25193	3.42438e-05	0.000287406	1.82954
ZBTB48	0.285438	6.684	2.74294	0.00671514	0.0257313	-3.04076
AK9	0.285401	4.49954	3.5961	0.000418744	0.00246075	-0.510987
CAST	0.285143	7.2247	2.71065	0.00737584	0.0278459	-3.1244
SYN2	0.285094	4.65695	5.08708	9.20953e-07	1.30683e-05	5.25934
MAP7D1	0.28462	7.76998	2.01702	0.0452031	0.120298	-4.69678
TRIP6	0.284581	5.61548	2.91972	0.00395881	0.0165926	-2.56687
ALOX15B	0.283943	4.44065	3.15121	0.0019094	0.00896723	-1.90595
RYBP	0.283773	8.14728	2.74695	0.00663702	0.0254606	-3.03032
PCIF1	0.283769	6.10208	4.37509	2.0684e-05	0.000186366	2.3049
OGFR	0.283457	6.94371	3.58607	0.000434031	0.00253602	-0.5442
ARHGAP18	0.283088	5.80265	2.04366	0.0424677	0.114496	-4.64445
TAS1R2	0.283034	3.81364	4.11913	5.82823e-05	0.000455528	1.32939
FUT4	0.282899	6.3209	2.54179	0.0118857	0.0411516	-3.54685
CD99P1	0.282797	6.17873	3.73663	0.000251395	0.00159456	-0.0372832
DCAF11	0.282702	7.46577	3.29255	0.00119858	0.00603331	-1.48034
RAB5B	0.282688	7.8585	2.72672	0.00704012	0.0268157	-3.0829
CAPN1	0.282129	6.92131	3.13409	0.0020181	0.0093936	-1.95638
PSMD1	0.281866	7.94025	2.37295	0.018718	0.0594549	-3.94399
FANCI	0.281592	4.95272	2.20124	0.0290115	0.0846234	-4.32158
ETF1	0.281369	7.83348	2.46948	0.0144784	0.0482582	-3.72005
LINC00528	0.281279	6.55837	2.18364	0.0303034	0.0876049	-4.35877
DHRSX	0.281274	6.16823	3.64067	0.000356747	0.00214952	-0.362441
SPG21	0.281184	8.45682	3.32786	0.0010644	0.00543269	-1.37143
SEC14L1	0.281111	7.95107	2.53237	0.0121983	0.0420417	-3.56969
STX4	0.280631	7.27887	4.05357	7.54364e-05	0.00056791	1.08727
SURF4	0.280411	7.80024	2.30273	0.0224566	0.068696	-4.10163
PRADC1	0.280016	6.32228	2.3135	0.0218439	0.0672423	-4.07775
LOC100506860	0.279572	3.87668	3.63824	0.000359881	0.00216615	-0.370554
HIST1H3C	0.279246	4.46851	4.77048	3.82627e-06	4.38617e-05	3.90326
NDST1	0.27881	5.8137	3.54585	0.000500761	0.00286217	-0.676564
MOB3C	0.278671	6.62771	3.81837	0.000185589	0.00121638	0.245373
RAB11FIP1	0.278465	8.54431	2.11648	0.0357008	0.0994296	-4.49808
EHMT1-IT1	0.278178	5.14358	3.82449	0.000181384	0.00119149	0.266745
CARS	0.278158	6.48353	3.51637	0.000555697	0.00313156	-0.7728
GAS6	0.277949	6.19374	3.2309	0.00147128	0.00719708	-1.66801
ARHGDIA	0.277822	6.73562	2.08728	0.0382939	0.105121	-4.55736
LRFN1	0.277777	5.38897	3.45445	0.00068997	0.00374885	-0.972579
SAPCD2	0.277739	6.89298	2.3858	0.018097	0.0578956	-3.91467
LOC101930097	0.277648	5.67776	3.85326	0.000162798	0.00108933	0.367594
RFX2	0.277576	6.1251	3.4589	0.000679406	0.00370424	-0.958351
MPZ	0.277525	5.89339	3.23166	0.00146761	0.00718082	-1.66572
NDUFS2	0.277384	8.09704	2.50079	0.0132997	0.0450337	-3.64563
HIST1H3F	0.277226	3.53461	4.93864	1.80988e-06	2.31606e-05	4.61537
CTNNB1	0.27719	6.47234	2.4611	0.0148093	0.0492249	-3.73983
F2R	0.277156	6.20459	2.16775	0.0315123	0.090374	-4.39211
TNIP3	0.276942	3.37213	2.11439	0.0358815	0.099865	-4.50236
SERAC1	0.276883	4.08063	3.91447	0.000129088	0.000895387	0.584297
WBP5	0.27688	3.62632	2.11042	0.0362261	0.100591	-4.51045
KEAP1	0.276532	6.55257	2.64435	0.0089198	0.0325691	-3.29326
POLDIP2	0.276364	7.3481	4.2572	3.35201e-05	0.000282374	1.84966
BAZ2A	0.276281	6.39249	5.05813	1.05182e-06	1.46411e-05	5.1326
CALR	0.276138	7.60918	2.22208	0.0275444	0.0810721	-4.27719
NRM	0.276043	8.7492	3.20464	0.00160412	0.0077487	-1.74701
[truncated: 5,852 more rows]

## Sheet: Table S2
Table S2 Differentially expressed genes between sepsis and control samples in the GSE154918 dataset (adults).
DEG	logFC	AveExpr	t	P.Value	adj.P.Val	B
CD177	3.95932	15.3295	15.3011	2.46779e-28	7.89815e-26	53.9653
HP	3.21616	13.6117	16.5566	7.33611e-31	7.04377e-28	59.7329
ZDHHC19	3.17667	11.4473	12.582	1.37722e-22	5.33902e-21	40.8328
CYP19A1	3.14599	7.97719	10.0416	5.67111e-17	6.00344e-16	28.0007
MMP8	3.13817	13.131	10.5667	3.82863e-18	5.03226e-17	30.6747
ADAMTS2	3.09351	9.20459	14.098	7.78947e-26	8.21875e-24	48.2559
OLAH	3.09122	9.53693	10.8342	9.71699e-19	1.42766e-17	32.0354
PCOLCE2	3.08387	8.61706	12.4198	3.10517e-22	1.07633e-20	40.0256
MCEMP1	3.07398	15.029	18.3608	2.42935e-34	1.55502e-30	67.6647
METTL7B	2.99378	8.91586	14.0035	1.23306e-25	1.21816e-23	47.8001
ARG1	2.97751	12.724	14.4118	1.70877e-26	2.50485e-24	49.7614
FAM20A	2.95366	10.5236	18.057	9.09715e-34	4.24896e-30	66.3588
GPR84	2.88534	11.1553	15.6971	3.85582e-29	1.81091e-26	55.8061
S100A12	2.8814	16.1714	15.093	6.59481e-28	1.7348e-25	52.9904
RETN	2.79073	12.9198	12.3131	5.30771e-22	1.69591e-20	39.4933
OLFM4	2.78037	11.8025	7.72967	7.27932e-12	3.66312e-11	16.3563
S100A8	2.67554	18.1731	15.9636	1.11762e-29	7.15387e-27	57.0338
PCSK9	2.67231	6.90508	8.38949	2.64501e-13	1.61091e-12	19.6322
NECAB1	2.64604	7.53527	9.45174	1.17161e-15	9.85481e-15	24.9984
ANKRD22	2.59844	11.5744	14.1843	5.12783e-26	5.91129e-24	48.6709
TNFAIP8L3	2.57238	7.06391	9.76502	2.34687e-16	2.24325e-15	26.5923
AP3B2	2.56343	9.54111	9.94789	9.17493e-17	9.37659e-16	27.5236
ANXA3	2.5302	14.7068	18.0122	1.10633e-33	4.24896e-30	66.1653
LCN2	2.50321	13.3571	8.61024	8.63165e-14	5.60357e-13	20.74
ITGA7	2.4626	10.4175	11.7387	9.65848e-21	2.26738e-19	36.6128
IL1R2	2.37824	15.4374	11.0352	3.47519e-19	5.64071e-18	33.056
SEMA6B	2.37001	10.549	14.1863	5.0773e-26	5.91129e-24	48.6807
VNN1	2.35305	14.06	14.1714	5.45725e-26	6.16444e-24	48.6091
KCNMA1	2.34372	8.84399	8.31581	3.83973e-13	2.28421e-12	19.2635
C1QC	2.32922	9.4599	11.716	1.08373e-20	2.51947e-19	36.4984
CLEC4D	2.32908	12.5416	12.3668	4.0531e-22	1.35042e-20	39.761
COL17A1	2.32602	9.01409	9.23824	3.49946e-15	2.75072e-14	23.9141
SPATC1	2.26066	8.85388	13.6281	7.7119e-25	5.80751e-23	45.9804
PRTN3	2.25861	9.21939	7.56468	1.65182e-11	7.97385e-11	15.5476
SLC51A	2.2541	10.0482	11.2306	1.28151e-19	2.30853e-18	34.0462
KLF14	2.25208	6.95405	9.19649	4.33342e-15	3.35814e-14	23.7023
MS4A4A	2.25117	11.4785	13.286	4.15348e-24	2.43169e-22	44.3089
S100A9	2.24807	20.7345	17.5684	7.79343e-33	1.87071e-29	64.2334
RNASE2	2.21633	12.9688	14.5078	1.0763e-26	1.65346e-24	50.22
C1QB	2.2081	10.2685	11.0113	3.92754e-19	6.29029e-18	32.9345
ADAMTS3	2.16872	6.2137	6.90822	4.09693e-10	1.6861e-09	12.3836
GADD45A	2.15941	12.4698	13.6623	6.52177e-25	5.02962e-23	46.1468
FCGR1A	2.14766	14.1836	14.9977	1.03673e-27	2.58549e-25	52.5416
SLC1A3	2.13991	9.12503	11.4024	5.33725e-20	1.04797e-18	34.9157
CCNA1	2.13553	8.35375	10.9162	6.38769e-19	9.85243e-18	32.4518
CYSTM1	2.13219	14.2915	12.6888	8.07295e-23	3.34105e-21	41.3631
MMP9	2.11136	16.7993	11.7818	7.76455e-21	1.87787e-19	36.8295
CHIT1	2.09794	10.6454	9.67655	3.69628e-16	3.38482e-15	26.1419
GALNT14	2.06312	11.3333	13.8666	2.40181e-25	2.15523e-23	47.1383
GYG1	2.04656	15.1258	15.4386	1.29263e-28	4.68348e-26	54.6066
TDRD9	2.03799	11.6966	12.5459	1.64981e-22	6.28596e-21	40.6535
BPI	2.03321	12.5427	9.27078	2.96228e-15	2.35061e-14	24.0792
BCL2A1	2.02476	13.0967	12.5132	1.94366e-22	7.23337e-21	40.4907
LILRA5	2.02304	16.3417	15.565	7.14688e-29	3.11752e-26	55.1942
FFAR3	2.01222	9.27977	10.2064	2.43273e-17	2.75447e-16	28.8402
FGF13	2.01166	9.24742	10.4204	8.10671e-18	1.00759e-16	29.9304
TCTEX1D1	1.99168	7.54731	9.00786	1.13728e-14	8.30074e-14	22.7466
ELANE	1.98394	10.8388	6.94044	3.50703e-10	1.45455e-09	12.5366
SLPI	1.97905	12.6823	11.6058	1.89633e-20	4.15225e-19	35.943
AMPH	1.97689	7.53219	11.2211	1.34485e-19	2.40682e-18	33.9983
GRB10	1.96813	12.214	14.8641	1.95654e-27	4.36877e-25	51.9116
CA1	1.94391	12.15	6.71098	1.05572e-09	4.13229e-09	11.4527
LTF	1.93472	14.226	6.94216	3.478e-10	1.44282e-09	12.5447
RNASE3	1.91827	9.81234	8.56641	1.07845e-13	6.89626e-13	20.5197
PPARG	1.91647	7.8632	15.304	2.43436e-28	7.89815e-26	53.9788
CRISP3	1.90242	10.7199	8.17918	7.65239e-13	4.37739e-12	18.5817
G0S2	1.88032	9.94489	11.0797	2.76894e-19	4.61202e-18	33.2815
MAOA	1.87989	7.46626	8.92167	1.76629e-14	1.26324e-13	22.3106
S100P	1.87603	14.0796	10.302	1.48855e-17	1.74937e-16	29.3275
DUSP13	1.87461	8.51998	11.0485	3.24812e-19	5.31744e-18	33.123
HPGD	1.87347	11.5853	7.76669	6.05304e-12	3.06612e-11	16.5385
DEFA4	1.86445	10.8114	5.1628	1.18203e-06	3.32336e-06	4.58798
RNASE1	1.86087	7.79901	12.3016	5.62419e-22	1.7822e-20	39.4358
OPLAH	1.85636	12.3938	13.1491	8.17267e-24	4.32804e-22	43.637
SOCS3	1.83853	14.8393	14.5299	9.6831e-27	1.53604e-24	50.325
BMX	1.83766	11.7512	12.8989	2.83185e-23	1.3199e-21	42.4032
PGLYRP1	1.83709	14.1503	12.1284	1.34576e-21	3.86287e-20	38.5695
CA4	1.81482	13.3395	12.7185	6.95777e-23	2.94459e-21	41.5107
PFKFB2	1.80727	13.2813	9.40598	1.48142e-15	1.22778e-14	24.7658
RGL4	1.78642	13.8141	12.8866	3.01007e-23	1.38948e-21	42.3426
IGFBP2	1.7848	8.6808	9.39992	1.52823e-15	1.26603e-14	24.735
FOLR3	1.77272	13.4844	8.01019	1.79042e-12	9.72323e-12	17.7416
DEFA3	1.7694	13.9673	5.35529	5.17712e-07	1.51249e-06	5.3903
ATP2C2	1.76447	8.90312	7.58576	1.48799e-11	7.20835e-11	15.6507
VSIG4	1.75993	10.3335	8.04563	1.49851e-12	8.23347e-12	17.9175
ORM1	1.75661	11.7068	7.07362	1.83952e-10	7.87085e-10	13.1718
SLC26A8	1.74844	11.9366	18.8281	3.26014e-35	6.26044e-31	69.6503
TCN1	1.74587	11.8163	8.20699	6.65141e-13	3.84257e-12	18.7203
SERPINB10	1.73283	8.94379	7.33924	5.02318e-11	2.29122e-10	14.4507
MYO10	1.7218	9.06291	12.7399	6.25381e-23	2.68662e-21	41.6166
CAMP	1.71191	12.5941	8.34344	3.33904e-13	2.00687e-12	19.4017
GPER1	1.71118	9.26576	11.8453	5.62859e-21	1.40189e-19	37.1489
HK3	1.7089	16.7806	16.1437	4.86433e-30	3.73639e-27	57.8583
CACNA1E	1.70822	11.579	12.7388	6.28779e-23	2.69519e-21	41.6112
SAMSN1	1.70362	13.7588	11.9076	4.10652e-21	1.05284e-19	37.4619
TLR5	1.70338	13.4354	17.2195	3.68182e-32	5.89183e-29	62.6963
CST7	1.69937	16.1687	12.3203	5.11909e-22	1.6411e-20	39.5292
DAAM2	1.69331	11.2742	6.5944	1.8388e-09	7.00327e-09	10.9074
ATP9A	1.68724	11.4767	10.7362	1.60588e-18	2.25859e-17	31.5369
FCGR1B	1.68722	13.0206	13.9023	2.01806e-25	1.86311e-23	47.3111
FCER1G	1.68592	16.6029	14.7146	3.99509e-27	7.74927e-25	51.2034
ANKRD34B	1.68377	10.0199	9.42164	1.36716e-15	1.13898e-14	24.8454
IFI27	1.68164	9.8576	6.22968	1.01873e-08	3.55362e-08	9.22744
NRN1	1.68085	8.52454	9.78326	2.13707e-16	2.05396e-15	26.6851
SH3PXD2B	1.67323	9.25808	11.3329	7.60327e-20	1.43706e-18	34.5644
PTGR1	1.66113	7.4033	13.9389	1.68877e-25	1.59751e-23	47.4879
TMTC1	1.65354	10.6881	6.95738	3.23131e-10	1.34659e-09	12.6172
IL18R1	1.65148	13.5111	10.8595	8.54023e-19	1.27924e-17	32.1636
ALPL	1.64868	17.2268	13.4189	2.15572e-24	1.38449e-22	44.96
RAP1GAP	1.63778	9.572	6.18079	1.27773e-08	4.41616e-08	9.00545
UPP1	1.6367	15.1495	16.5628	7.133e-31	7.04377e-28	59.7607
TP53I3	1.62981	11.1352	13.7768	3.72318e-25	3.1358e-23	46.7032
CEACAM8	1.62829	10.8431	5.8716	5.25891e-08	1.71013e-07	7.62075
NECTIN2	1.62382	11.5053	10.1502	3.24664e-17	3.59339e-16	28.5539
MAP2K6	1.6204	11.9647	14.0066	1.2147e-25	1.2086e-23	47.8149
TNFAIP6	1.62026	13.0121	10.4314	7.66378e-18	9.56876e-17	29.9861
C3AR1	1.61837	13.8695	13.7722	3.80817e-25	3.17949e-23	46.6808
KCNG2	1.61325	7.50712	8.32571	3.65223e-13	2.18078e-12	19.313
HSD3B7	1.6126	10.4495	13.604	8.6788e-25	6.28902e-23	45.8631
NLRC4	1.61215	14.1836	16.3768	1.66764e-30	1.45562e-27	58.9192
AHSP	1.60779	11.7927	6.12593	1.64606e-08	5.61943e-08	8.75732
SERPINB1	1.60183	16.5927	14.7264	3.77526e-27	7.55171e-25	51.2595
IL18RAP	1.59552	14.8877	11.9522	3.2762e-21	8.53635e-20	37.6862
KCNE1	1.58924	11.7407	13.4607	1.75509e-24	1.16619e-22	45.1641
CTSG	1.58401	9.50285	4.8264	4.81058e-06	1.26337e-05	3.22828
FCAR	1.58168	14.2512	13.9923	1.30177e-25	1.26893e-23	47.7462
CEACAM6	1.57612	9.54133	4.96038	2.76754e-06	7.46315e-06	3.76314
CYYR1	1.5747	8.19163	9.98522	7.57442e-17	7.85875e-16	27.7137
STOM	1.57453	15.5222	12.4326	2.91268e-22	1.0188e-20	40.0891
RAB13	1.57347	10.0769	14.1853	5.10122e-26	5.91129e-24	48.676
CEACAM1	1.5734	13.9067	10.7718	1.33804e-18	1.91037e-17	31.7179
CLEC5A	1.56683	11.485	11.3763	6.09601e-20	1.18125e-18	34.7837
PFKFB3	1.56527	15.2842	11.9511	3.2943e-21	8.57187e-20	37.6807
ADM	1.55429	14.2756	15.9398	1.24812e-29	7.48986e-27	56.9243
TXN	1.55383	13.3558	16.4031	1.47825e-30	1.35176e-27	59.0387
TMEM92	1.55358	7.72576	9.40941	1.45559e-15	1.20742e-14	24.7833
SYN2	1.55337	7.83691	12.8722	3.23338e-23	1.47835e-21	42.2715
HMGB2	1.54303	14.4733	13.6144	8.24774e-25	6.07019e-23	45.9137
C1QA	1.5413	11.2714	8.4404	2.04381e-13	1.26156e-12	19.8872
FAM83A	1.53771	6.13143	5.15859	1.20334e-06	3.37981e-06	4.57063
KCNE1B	1.53056	8.03481	9.45937	1.12664e-15	9.51824e-15	25.0372
TSPO	1.52534	16.3835	14.2625	3.51158e-26	4.46575e-24	49.0466
OSM	1.52525	11.3159	13.0439	1.37731e-23	6.9237e-22	43.1188
PLSCR1	1.52316	14.5811	14.5186	1.022e-26	1.5827e-24	50.2714
BIRC5	1.52262	9.11462	8.80351	3.2273e-14	2.23008e-13	21.7138
GRINA	1.51203	16.332	14.4721	1.27804e-26	1.91737e-24	50.0496
KREMEN1	1.50886	14.4378	12.5246	1.83539e-22	6.9046e-21	40.5476
AIM2	1.50651	11.9352	13.101	1.03753e-23	5.35584e-22	43.4
CKAP4	1.50483	15.2098	13.501	1.43961e-24	9.67845e-23	45.3608
IFITM3	1.50439	16.1391	8.63184	7.73391e-14	5.04807e-13	20.8487
EDNRB	1.50067	6.29836	10.7339	1.62472e-18	2.27568e-17	31.5253
TMEM119	1.49582	8.96588	8.42923	2.16284e-13	1.33161e-12	19.8312
LRG1	1.49571	15.9791	13.4337	2.00444e-24	1.30038e-22	45.0322
DNAH17	1.4932	10.7242	15.8304	2.07365e-29	1.10612e-26	56.421
ECHDC3	1.48521	10.9334	9.27284	2.93116e-15	2.32687e-14	24.0896
ST6GALNAC3	1.48422	10.3482	10.8703	8.08133e-19	1.2181e-17	32.2184
PLBD1	1.48306	16.4824	17.4769	1.1693e-32	2.24541e-29	63.8319
IL27	1.4805	8.74102	12.9594	2.09526e-23	1.00338e-21	42.7023
MPO	1.48017	11.3585	6.66762	1.29824e-09	5.03538e-09	11.2494
BEX1	1.4766	6.73153	7.83551	4.29374e-12	2.2135e-11	16.8775
CD63	1.47009	16.1457	14.8655	1.94362e-27	4.36877e-25	51.9182
ERFE	1.46598	7.28417	5.78084	7.91787e-08	2.52402e-07	7.2209
COX6B2	1.46105	6.37321	10.2582	1.86374e-17	2.15989e-16	29.1045
IRAK3	1.45556	15.3456	14.3898	1.90005e-26	2.72289e-24	49.6561
FKBP5	1.45491	15.851	11.4487	4.21615e-20	8.54037e-19	35.1498
CD59	1.4549	14.1009	13.3362	3.24204e-24	1.94553e-22	44.5549
UGCG	1.45398	13.7361	10.3973	9.12946e-18	1.11878e-16	29.8125
DACH1	1.45172	10.4314	11.6366	1.62153e-20	3.60396e-19	36.0984
SMPDL3A	1.44893	11.3666	8.25562	5.2041e-13	3.04957e-12	18.9629
EXOSC4	1.43336	11.5949	10.7582	1.43433e-18	2.03423e-17	31.649
GGH	1.42988	9.51983	10.8591	8.55484e-19	1.27941e-17	32.1619
DDAH2	1.42953	13.7378	13.3518	3.00187e-24	1.83e-22	44.6313
HPD	1.42425	7.30974	8.24847	5.39544e-13	3.15399e-12	18.9272
CLEC4E	1.42288	14.9617	12.5392	1.7063e-22	6.46275e-21	40.62
DLC1	1.42288	7.67467	8.94429	1.57364e-14	1.13009e-13	22.425
HMMR	1.42183	7.63598	7.62366	1.23304e-11	6.02343e-11	15.8361
NSUN7	1.42156	11.5514	12.4632	2.49745e-22	8.93084e-21	40.2418
CAPN13	1.41551	6.79444	7.55876	1.701e-11	8.19887e-11	15.5186
RHAG	1.41027	6.79416	6.48987	3.01508e-09	1.11838e-08	10.4218
RAB20	1.40865	12.2834	10.7831	1.26265e-18	1.81351e-17	31.7755
WFDC1	1.40788	5.55795	5.55978	2.11835e-07	6.45591e-07	6.26057
TFF3	1.40394	7.45324	7.48523	2.44698e-11	1.15396e-10	15.1599
LY96	1.4036	11.7787	13.2165	5.85591e-24	3.24067e-22	43.9679
NDUFB3	1.4029	11.3507	13.4816	1.58379e-24	1.0597e-22	45.266
PGD	1.3953	17.2082	13.5231	1.2916e-24	8.95398e-23	45.4685
TIMP4	1.39119	5.31004	5.66531	1.32721e-07	4.14414e-07	6.71659
HBD	1.38958	7.7035	5.9188	4.24615e-08	1.39121e-07	7.8299
ALOX5AP	1.38268	16.5148	11.5828	2.13162e-20	4.61484e-19	35.8268
TMIGD3	1.38089	8.22885	8.28325	4.52649e-13	2.66715e-12	19.1008
HTRA3	1.38062	7.10863	5.38352	4.58091e-07	1.34774e-06	5.50934
PTGFR	1.37876	6.67705	8.04917	1.47213e-12	8.10243e-12	17.935
NAIP	1.37833	13.2854	11.3906	5.66664e-20	1.10811e-18	34.8562
PLAC8	1.3749	15.1418	9.42806	1.32289e-15	1.10498e-14	24.878
SLC2A3	1.37012	16.9707	13.8058	3.2319e-25	2.79559e-23	46.8437
METTL9	1.35393	15.5942	13.7047	5.29756e-25	4.18252e-23	46.3532
LRRC70	1.3514	7.13846	9.07513	8.0635e-15	6.00634e-14	23.0871
CARD16	1.34987	12.5532	13.9784	1.39306e-25	1.35105e-23	47.679
FSTL4	1.34683	7.4922	6.85943	5.18246e-10	2.1031e-09	12.1523
AZU1	1.34441	10.3189	4.93426	3.08459e-06	8.28207e-06	3.65813
PLB1	1.33558	13.4955	10.4302	7.70948e-18	9.60709e-17	29.9802
ASPH	1.33486	13.0651	10.6913	2.02106e-18	2.7821e-17	31.3087
NMNAT2	1.33434	6.72676	12.696	7.78698e-23	3.25073e-21	41.3989
SLC28A3	1.33296	7.80973	8.85148	2.52702e-14	1.76239e-13	21.956
TARM1	1.32762	7.12753	6.86388	5.07266e-10	2.06116e-09	12.1734
MYL6	1.32608	16.7786	12.5818	1.37857e-22	5.33902e-21	40.8318
CR1	1.3256	15.3527	12.8358	3.87603e-23	1.735e-21	42.0915
PSTPIP2	1.32347	14.187	13.4365	1.97674e-24	1.29113e-22	45.046
CYB5R2	1.32179	7.43317	10.3239	1.33043e-17	1.57803e-16	29.4389
PLIN5	1.31801	13.1694	11.7388	9.65348e-21	2.26738e-19	36.6133
GCA	1.31432	17.2698	12.1386	1.27791e-21	3.68465e-20	38.6209
SNX3	1.31429	15.1762	13.8421	2.70705e-25	2.38457e-23	47.0196
HGF	1.31338	11.1598	8.22499	6.07401e-13	3.51959e-12	18.8101
CD274	1.31217	12.094	8.57581	1.02816e-13	6.60548e-13	20.567
LMNB1	1.31208	14.6234	14.5991	6.94592e-27	1.17002e-24	50.6546
MROH6	1.31196	12.0387	11.7406	9.56793e-21	2.25163e-19	36.6221
ACSL1	1.30925	18.1987	12.9729	1.95962e-23	9.50267e-22	42.7687
RAB32	1.30811	13.7394	13.3756	2.66938e-24	1.65355e-22	44.7478
NR2E1	1.30751	6.02396	11.5538	2.47045e-20	5.25361e-19	35.6804
ENTPD7	1.30649	10.3431	8.2452	5.48535e-13	3.20362e-12	18.9108
IFITM1	1.3046	16.5983	12.4269	2.99619e-22	1.04421e-20	40.061
SLCO4A1	1.30295	8.11743	8.47425	1.72154e-13	1.07473e-12	20.057
LRRN1	1.30204	9.82048	9.52535	8.03117e-16	6.98788e-15	25.3727
HMGB3	1.30133	9.27254	12.5623	1.51957e-22	5.83608e-21	40.7351
CD55	1.29542	15.9807	11.8273	6.16666e-21	1.51818e-19	37.0582
LDHA	1.29347	15.8132	12.1426	1.2527e-21	3.61739e-20	38.6407
CLU	1.29181	14.5024	10.2447	1.99831e-17	2.30196e-16	29.0353
SORT1	1.2901	14.2717	11.0456	3.29614e-19	5.3823e-18	33.1085
CASP5	1.28898	11.1249	7.86044	3.79084e-12	1.97064e-11	17.0006
RRM2	1.28609	9.42028	6.96132	3.17035e-10	1.32233e-09	12.6359
OLR1	1.28506	8.35977	4.48225	1.91218e-05	4.69859e-05	1.89791
FUT7	1.28503	14.2454	12.384	3.71623e-22	1.2586e-20	39.8472
HIST1H2BK	1.28352	13.8856	13.1763	7.14493e-24	3.8649e-22	43.7704
CSTA	1.27841	12.2692	12.6384	1.03843e-22	4.13712e-21	41.1131
CARD17	1.27705	9.13765	7.27965	6.72957e-11	3.02288e-10	14.1624
CYP1B1	1.27211	13.9308	9.2875	2.71909e-15	2.17199e-14	24.1641
S100A6	1.27174	17.0031	15.1721	4.53736e-28	1.26277e-25	53.3613
UNC5A	1.27116	7.0791	12.9822	1.87074e-23	9.14094e-22	42.8148
ANLN	1.27088	7.94578	7.51435	2.11907e-11	1.00924e-10	15.3018
MARCO	1.26942	12.0534	8.62238	8.1148e-14	5.2895e-13	20.8012
VPS9D1	1.26676	14.1759	15.872	1.70885e-29	9.6515e-27	56.6129
GADD45G	1.26532	9.33759	12.8024	4.57877e-23	2.01665e-21	41.9261
LILRA6	1.26513	15.4209	12.6343	1.06013e-22	4.21484e-21	41.0926
ST3GAL4	1.2643	13.6874	13.0307	1.47055e-23	7.33481e-22	43.0538
DLGAP5	1.26324	8.06939	7.17508	1.12232e-10	4.92164e-10	13.6584
ANOS1	1.26151	6.44455	7.33587	5.10715e-11	2.3273e-10	14.4344
FLOT1	1.26062	16.4221	15.162	4.75757e-28	1.30514e-25	53.3143
SRGN	1.25807	18.3699	13.3988	2.38117e-24	1.51913e-22	44.8612
GYPA	1.25683	6.81518	5.67212	1.28763e-07	4.02645e-07	6.74614
MAPK14	1.25618	16.2451	14.6027	6.82585e-27	1.15997e-24	50.6719
TPST1	1.2542	11.5038	7.54682	1.80455e-11	8.66537e-11	15.4603
PDCD1LG2	1.25361	8.02766	6.94418	3.44417e-10	1.43095e-09	12.5544
C1orf226	1.24948	7.37735	9.59633	5.57949e-16	4.97414e-15	25.7337
PRL	1.24928	5.8	5.39498	4.35848e-07	1.28506e-06	5.55779
PYGL	1.24828	16.8401	13.2225	5.68584e-24	3.17399e-22	43.9972
C4BPA	1.24669	9.28568	4.52828	1.59541e-05	3.96385e-05	2.07209
ROPN1L	1.24605	12.0946	12.7852	4.98893e-23	2.17733e-21	41.8409
SCN5A	1.24497	6.01311	4.54696	1.48187e-05	3.69276e-05	2.14312
ZNF438	1.24227	12.8645	14.2293	4.12376e-26	5.10894e-24	48.8871
ADGRG3	1.23951	16.1921	13.3069	3.7466e-24	2.22056e-22	44.4113
CNIH4	1.23669	12.9988	14.3299	2.53586e-26	3.45363e-24	49.3696
CDKN2C	1.23223	10.4325	12.097	1.57653e-21	4.42605e-20	38.4124
KL	1.23104	8.1338	8.37413	2.85883e-13	1.73563e-12	19.5553
CCNB2	1.22991	8.41306	8.07303	1.30578e-12	7.24496e-12	18.0535
SPC25	1.2295	6.29734	7.03259	2.24502e-10	9.51682e-10	12.9756
HPN	1.22926	6.96709	8.88761	2.10163e-14	1.48483e-13	22.1385
PRUNE2	1.22908	9.0105	5.92418	4.14368e-08	1.36019e-07	7.85379
ANXA1	1.22896	15.7672	10.8861	7.45037e-19	1.13009e-17	32.2991
DSC2	1.22775	13.2144	9.83264	1.65835e-16	1.62228e-15	26.9366
S100A11	1.22726	17.7407	12.9505	2.18974e-23	1.04601e-21	42.6585
DRAM1	1.22707	12.7082	14.9322	1.41515e-27	3.31404e-25	52.233
DEPDC1	1.22298	6.53176	6.63441	1.52061e-09	5.84707e-09	11.0941
LIPN	1.2213	10.8513	7.99953	1.8888e-12	1.02171e-11	17.6888
C19orf38	1.22076	14.7014	14.6434	5.61648e-27	1.00797e-24	50.8654
SERINC2	1.21848	10.0097	9.54403	7.29713e-16	6.38682e-15	25.4677
ABCA13	1.21603	8.60416	4.8753	3.93544e-06	1.04353e-05	3.42242
MERTK	1.21273	10.188	8.33665	3.45564e-13	2.07177e-12	19.3678
INSC	1.21184	8.03758	9.88706	1.254e-16	1.24706e-15	27.2137
BATF	1.21139	12.1411	14.1908	4.96892e-26	5.89001e-24	48.7021
TROAP	1.20934	7.93756	8.46769	1.77977e-13	1.10892e-12	20.0241
MGST1	1.20864	11.7824	13.7737	3.78124e-25	3.1708e-23	46.6879
NTSR1	1.20802	9.44474	6.46914	3.32464e-09	1.22704e-08	10.3258
PROK2	1.20701	15.9136	9.34081	2.06906e-15	1.68143e-14	24.4348
CDK1	1.20633	8.06522	6.76914	7.99398e-10	3.1802e-09	11.7261
TCN2	1.20584	11.4826	9.9711	8.14384e-17	8.40334e-16	27.6418
F5	1.20455	13.5992	11.1955	1.53308e-19	2.70586e-18	33.8683
INSL3	1.20395	9.55073	11.3872	5.76818e-20	1.12453e-18	34.8386
GPR42	1.20379	5.6349	6.64416	1.45168e-09	5.59884e-09	11.1396
VSTM1	1.2036	12.2619	7.98915	1.98972e-12	1.0715e-11	17.6373
GYPB	1.20333	8.60873	4.94195	2.9877e-06	8.03317e-06	3.68903
PDSS1	1.20177	10.1569	9.3855	1.6455e-15	1.35384e-14	24.6617
CRISP2	1.19989	6.1719	5.11136	1.46984e-06	4.09479e-06	4.37649
SMARCD3	1.19874	13.3836	12.6572	9.45165e-23	3.84293e-21	41.2065
E2F2	1.19862	12.3642	13.5058	1.40623e-24	9.54196e-23	45.3841
CEP55	1.19646	8.02416	7.23866	8.22565e-11	3.64966e-10	13.9646
INHBA	1.19594	6.44751	5.05959	1.82816e-06	5.03747e-06	4.16491
UPB1	1.19464	10.284	9.0096	1.1272e-14	8.23027e-14	22.7554
TBC1D8	1.19411	13.1332	11.9054	4.15227e-21	1.06315e-19	37.4509
ACHE	1.19375	7.36973	6.2725	8.34914e-09	2.94343e-08	9.4225
IL1R1	1.19258	12.5746	10.7981	1.16926e-18	1.69076e-17	31.8518
SLC22A4	1.19069	13.3245	15.1269	5.61858e-28	1.50163e-25	53.1493
IDI1	1.18756	13.5216	8.33676	3.45374e-13	2.07127e-12	19.3683
SIGLEC14	1.18647	14.3861	6.9703	3.03559e-10	1.27027e-09	12.6786
DYSF	1.18362	16.8927	11.4419	4.3649e-20	8.82308e-19	35.1153
NFE2	1.1813	16.4747	14.1043	7.55668e-26	8.01718e-24	48.286
OSCAR	1.17943	14.9483	14.2525	3.68593e-26	4.65664e-24	48.9985
PLP2	1.17853	15.5036	11.4449	4.2982e-20	8.69741e-19	35.1306
TIMP1	1.17632	14.6838	10.8925	7.2116e-19	1.09821e-17	32.3314
NQO2	1.17388	14.5723	13.7108	5.14355e-25	4.09059e-23	46.3824
ORM2	1.17382	8.08803	6.56521	2.1118e-09	7.98914e-09	10.7714
CHMP4C	1.17102	5.78528	5.72988	9.95013e-08	3.14367e-07	6.99779
XRCC4	1.17001	9.8489	11.4132	5.05072e-20	1.0005e-18	34.9705
RAB3IL1	1.16977	8.98398	6.79636	7.01618e-10	2.80633e-09	11.8544
MGAM2	1.1654	11.1339	9.73738	2.7047e-16	2.54974e-15	26.4516
CDC20	1.16481	8.58736	6.63842	1.49186e-09	5.74343e-09	11.1128
ALAS2	1.16365	16.446	5.23843	8.56162e-07	2.44438e-06	4.90122
LGALS1	1.16201	14.9171	12.4527	2.63251e-22	9.29059e-21	40.1895
SRPK1	1.161	14.9324	15.6831	4.11644e-29	1.8821e-26	55.7412
IFITM2	1.16089	18.7369	11.6288	1.68755e-20	3.72911e-19	36.0588
TRPM2	1.16044	12.6576	12.0441	2.0595e-21	5.59387e-20	38.1471
MKNK1	1.15821	15.2053	12.2976	5.73873e-22	1.80824e-20	39.4158
DHRS9	1.15675	13.2196	7.45561	2.83243e-11	1.32629e-10	15.0156
ADAM9	1.15637	12.3202	13.3674	2.77858e-24	1.7138e-22	44.708
CD163	1.15613	13.9751	7.50309	2.24033e-11	1.06304e-10	15.2469
FSTL3	1.15514	10.6827	9.96577	8.37027e-17	8.62309e-16	27.6146
FAM89A	1.15476	9.65356	7.87912	3.45269e-12	1.80512e-11	17.0929
GGT1	1.15417	12.5278	13.2727	4.43441e-24	2.57263e-22	44.2439
GSTO1	1.15281	13.7217	14.3482	2.32121e-26	3.18387e-24	49.4574
LOXL1	1.14984	8.58248	11.6384	1.6071e-20	3.58433e-19	36.1073
ASGR2	1.14954	12.3801	11.0523	3.18535e-19	5.22805e-18	33.1424
BST1	1.1488	14.9485	15.0867	6.79536e-28	1.7634e-25	52.9607
AGFG1	1.14808	14.6051	11.3651	6.45501e-20	1.24204e-18	34.7269
TK1	1.14739	9.81902	8.20563	6.69713e-13	3.86782e-12	18.7135
CLIC1	1.1469	16.8746	15.5603	7.30554e-29	3.11752e-26	55.1725
AGTRAP	1.1464	15.4638	15.9813	1.0299e-29	6.81968e-27	57.1148
VNN2	1.14618	17.7017	10.3982	9.08408e-18	1.11513e-16	29.8174
BCL6	1.14347	17.4876	14.1313	6.62743e-26	7.31417e-24	48.4163
PNPLA1	1.14022	10.5943	11.0456	3.29513e-19	5.3823e-18	33.1088
HIST1H4I	1.13962	9.48427	11.4608	3.96401e-20	8.08077e-19	35.211
GPR160	1.13671	12.5094	9.79801	1.98117e-16	1.91659e-15	26.7602
STXBP2	1.13593	15.9321	10.4632	6.50889e-18	8.20146e-17	30.1482
BCAT1	1.13278	11.0447	8.96574	1.41031e-14	1.01774e-13	22.5335
PLIN4	1.13262	12.9308	10.702	1.91312e-18	2.64489e-17	31.3631
FAM151B	1.13102	9.41202	13.7318	4.63936e-25	3.77499e-23	46.4848
ERG	1.12948	7.71588	5.51921	2.53258e-07	7.6636e-07	6.08649
GMFG	1.12941	15.9171	14.4756	1.25669e-26	1.90017e-24	50.0663
GNG5	1.12613	14.5575	14.5896	7.26911e-27	1.20335e-24	50.6095
QSOX1	1.12596	14.7643	12.061	1.89115e-21	5.18057e-20	38.2317
BLOC1S1	1.12585	11.0109	13.5356	1.21456e-24	8.45045e-23	45.5295
IQGAP3	1.12527	6.77016	6.09085	1.93453e-08	6.56338e-08	8.59918
LAMTOR5	1.1218	13.5097	12.3778	3.83395e-22	1.29391e-20	39.8162
RSPH9	1.12166	9.01592	12.2034	9.21828e-22	2.75301e-20	38.9452
SIGLEC5	1.12108	11.7868	11.7636	8.51359e-21	2.03848e-19	36.738
FPR1	1.121	18.3157	12.7333	6.46381e-23	2.75832e-21	41.5838
HIST1H2BD	1.11849	11.4356	9.72979	2.81232e-16	2.64304e-15	26.4129
HIST1H1C	1.11722	12.8329	8.15427	8.67604e-13	4.92189e-12	18.4576
AOC1	1.11488	9.10889	4.17159	6.30402e-05	0.000146397	0.754433
TYMS	1.11459	9.72248	6.26634	8.59177e-09	3.02286e-08	9.39441
AC005747.1	1.1139	15.6441	11.9026	4.21182e-21	1.07267e-19	37.4368
APOBEC3B	1.11348	9.39045	4.82748	4.78932e-06	1.25813e-05	3.23256
EFCAB2	1.11312	10.7061	9.14094	5.7586e-15	4.37776e-14	23.4206
CENPW	1.11199	7.90429	10.4305	7.69882e-18	9.60003e-17	29.9816
SAT1	1.11175	16.7466	15.1264	5.63023e-28	1.50163e-25	53.1472
SQOR	1.11165	13.8575	13.3374	3.223e-24	1.94016e-22	44.5607
KIF20A	1.10911	7.13903	7.26364	7.2788e-11	3.25588e-10	14.0851
PGS1	1.10807	15.3553	14.1388	6.39022e-26	7.09314e-24	48.4524
MSRB1	1.10743	16.7295	13.9473	1.62037e-25	1.5404e-23	47.5289
ERLIN1	1.10534	12.9407	10.9209	6.23532e-19	9.64842e-18	32.4757
EIF1AY	1.10448	9.0957	2.67677	0.0086443	0.0154029	-3.84671
CARD6	1.10441	13.2026	13.9611	1.51562e-25	1.46254e-23	47.5953
CDKN3	1.1017	6.92949	8.31051	3.94391e-13	2.34183e-12	19.2371
CAPG	1.09783	15.1427	11.4723	3.73976e-20	7.66431e-19	35.2688
IL1RN	1.09781	15.0381	11.6289	1.68631e-20	3.72911e-19	36.0595
OMG	1.09615	8.64802	10.8386	9.50492e-19	1.39972e-17	32.0573
KLHL2	1.09586	13.9018	10.6027	3.18328e-18	4.24798e-17	30.8579
EXOC6	1.09285	12.9027	12.0698	1.80844e-21	4.97529e-20	38.2761
SMIM1	1.09026	10.7347	5.92298	4.16634e-08	1.36716e-07	7.84845
MILR1	1.08945	12.6179	9.95358	8.91098e-17	9.13114e-16	27.5525
SLC11A1	1.08813	17.1643	12.0782	1.73346e-21	4.79649e-20	38.3182
ATP5F1E	1.08811	14.3147	13.2152	5.89237e-24	3.24497e-22	43.9617
USB1	1.08792	14.9589	15.3566	1.90022e-28	6.40568e-26	54.2245
MS4A3	1.0879	10.2226	4.08715	8.63873e-05	0.00019803	0.453643
SIPA1L2	1.08753	12.7675	10.415	8.33656e-18	1.03415e-16	29.9026
MANSC1	1.08748	14.0363	10.9143	6.4499e-19	9.91653e-18	32.4422
SERPINB2	1.08748	9.06911	8.5198	1.36638e-13	8.63964e-13	20.2856
TACSTD2	1.08588	8.10997	4.30157	3.85141e-05	9.15784e-05	1.22591
POR	1.08498	14.5282	11.1782	1.67412e-19	2.9199e-18	33.7809
GAPDH	1.08466	18.2414	15.1928	4.11377e-28	1.17905e-25	53.4585
GLDN	1.08309	5.48388	7.88286	3.38871e-12	1.77408e-11	17.1113
ANKRD9	1.08289	11.3648	7.40575	3.62159e-11	1.67418e-10	14.7733
NME8	1.082	10.6069	11.2069	1.44629e-19	2.57159e-18	33.9261
PPBP	1.08065	13.3142	6.70791	1.07133e-09	4.19081e-09	11.4382
FLVCR2	1.08012	11.4543	11.0351	3.47789e-19	5.64071e-18	33.0552
FKBP9	1.07978	10.4159	10.9013	6.89424e-19	1.05239e-17	32.376
IL10	1.07731	5.80097	7.70937	8.05349e-12	4.02582e-11	16.2565
C5orf67	1.07675	7.77707	9.18869	4.51e-15	3.48653e-14	23.6627
CBS	1.07592	7.10659	7.71839	7.69967e-12	3.86554e-11	16.3009
TSPO2	1.07232	6.8801	5.0815	1.66716e-06	4.61305e-06	4.2543
CHPT1	1.07064	13.8624	10.7704	1.34751e-18	1.92103e-17	31.711
LTB4R	1.07057	15.0894	13.4499	1.85079e-24	1.22133e-22	45.1114
RAB5IF	1.07027	13.9477	15.4508	1.22084e-28	4.59681e-26	54.6633
DHRS13	1.06996	13.7208	11.085	2.69535e-19	4.50861e-18	33.3082
BASP1	1.06788	17.4279	9.7114	3.09068e-16	2.88108e-15	26.3193
TWIST2	1.06607	6.14145	5.6186	1.63322e-07	5.04583e-07	6.51418
MSRB2	1.06345	12.0951	11.8802	4.71554e-21	1.18992e-19	37.3246
RCVRN	1.0631	7.29038	7.48439	2.45717e-11	1.1582e-10	15.1558
SERPINA1	1.06233	18.5713	11.9461	3.37908e-21	8.76871e-20	37.6555
CD82	1.06066	15.5794	9.75493	2.47169e-16	2.35138e-15	26.5409
SHROOM4	1.06045	7.32281	9.80611	1.90044e-16	1.84407e-15	26.8015
FLOT2	1.06043	17.4921	12.0879	1.65096e-21	4.60281e-20	38.3666
CEBPB	1.05966	16.8783	11.212	1.40891e-19	2.51678e-18	33.9521
ACER3	1.05905	13.1307	10.2157	2.31939e-17	2.64171e-16	28.8875
CMTM2	1.05661	14.424	9.08455	7.68427e-15	5.74391e-14	23.1349
TIFA	1.05433	12.6204	9.66638	3.89436e-16	3.55435e-15	26.0901
BPGM	1.05402	12.6454	6.87041	4.91555e-10	2.00155e-09	12.2044
NCAPG	1.05366	8.41835	6.36101	5.52374e-09	1.99347e-08	9.82762
LTA4H	1.0517	16.1683	13.7847	3.58321e-25	3.04462e-23	46.7412
CEBPD	1.05156	16.2508	11.1856	1.61187e-19	2.82158e-18	33.8185
GPR141	1.05155	11.5946	11.9871	2.74609e-21	7.29365e-20	37.8614
DDIAS	1.05119	10.4573	12.2944	5.83159e-22	1.8328e-20	39.3998
UBL5	1.05105	13.416	13.13	8.98716e-24	4.68969e-22	43.5426
POMP	1.05032	12.6248	15.3565	1.90139e-28	6.40568e-26	54.2239
BTBD19	1.04949	10.6745	10.1129	3.9305e-17	4.26185e-16	28.3643
IER3	1.04426	12.4999	10.7922	1.20529e-18	1.73894e-17	31.8216
CLEC1B	1.04409	8.99348	7.23969	8.18414e-11	3.63208e-10	13.9696
HIST1H2AI	1.04389	6.83615	9.44817	1.19321e-15	1.00233e-14	24.9803
CTSD	1.04342	16.0987	10.4527	6.86816e-18	8.61459e-17	30.0949
PADI4	1.04324	15.6871	9.52802	7.92184e-16	6.90214e-15	25.3862
ANO10	1.04268	12.3362	12.3909	3.59003e-22	1.22668e-20	39.8815
MGAM	1.04164	16.1328	10.1967	2.55601e-17	2.88554e-16	28.7911
VAMP5	1.03771	12.2751	9.69485	3.36476e-16	3.1124e-15	26.2351
C1orf162	1.03596	14.8795	11.3077	8.6464e-20	1.61357e-18	34.4368
PROS1	1.03344	8.98199	7.80439	5.01558e-12	2.56564e-11	16.7241
ITGAM	1.03257	16.3516	13.9147	1.89948e-25	1.7793e-23	47.3712
PHTF1	1.03217	12.2866	11.9401	3.48246e-21	9.0248e-20	37.6255
CDCA5	1.03066	8.67106	7.21752	9.12178e-11	4.02957e-10	13.8627
ELOVL3	1.02876	7.21642	9.41989	1.37945e-15	1.14823e-14	24.8365
TP53I11	1.02752	14.9315	11.119	2.26479e-19	3.85556e-18	33.4809
SAP30	1.02705	10.5786	9.75152	2.51534e-16	2.38529e-15	26.5235
SDC1	1.02684	6.39208	4.26038	4.50684e-05	0.000106242	1.07541
IFNGR1	1.0261	15.8269	11.2686	1.05541e-19	1.93757e-18	34.2389
BIK	1.02505	9.11295	11.5209	2.92054e-20	6.09599e-19	35.5142
MYL12A	1.02437	16.7351	14.3221	2.63313e-26	3.56084e-24	49.3323
LRRC75B	1.0237	8.38088	9.88593	1.26129e-16	1.25236e-15	27.208
RNF10	1.02327	16.6997	11.6773	1.31909e-20	3.01194e-19	36.3033
EMILIN2	1.02316	14.7863	10.5399	4.39275e-18	5.6919e-17	30.5383
PCMT1	1.02304	13.7984	12.719	6.94127e-23	2.94459e-21	41.513
KIF18B	1.02135	7.51835	6.29821	7.40679e-09	2.63394e-08	9.53992
MBOAT2	1.02106	13.5304	13.3933	2.44553e-24	1.54989e-22	44.8348
SLC37A3	1.02086	12.9037	10.1516	3.22302e-17	3.57136e-16	28.5611
MYBPC3	1.02031	11.8	11.6013	1.94075e-20	4.23021e-19	35.92
SDHAF3	1.0199	10.496	9.79871	1.97407e-16	1.91069e-15	26.7638
BRI3	1.01972	15.4453	14.5282	9.75875e-27	1.53604e-24	50.3172
GLRX	1.01946	14.1343	13.0314	1.46503e-23	7.32629e-22	43.0575
TIMM8B	1.01924	10.3341	8.63399	7.6498e-14	5.00167e-13	20.8596
NCF4	1.01853	16.6048	14.2055	4.62575e-26	5.51728e-24	48.7731
ATP5MPL	1.01716	11.908	11.3723	6.22278e-20	1.20338e-18	34.7633
MYBL2	1.01652	10.2382	5.46771	3.17407e-07	9.51775e-07	5.86653
C1GALT1C1	1.01409	11.8772	13.5778	9.87208e-25	7.10014e-23	45.7353
KIF4A	1.01386	7.55512	6.79917	6.92226e-10	2.77222e-09	11.8676
ARMC12	1.01342	7.79478	9.15064	5.47972e-15	4.17767e-14	23.4698
QPCT	1.01248	15.171	12.1642	1.12318e-21	3.263e-20	38.749
UBE2C	1.01244	9.25531	9.71865	2.97778e-16	2.78539e-15	26.3562
AGPAT2	1.01133	13.6816	15.712	3.59737e-29	1.81091e-26	55.8749
AQP9	1.0086	17.8906	10.9425	5.58354e-19	8.73844e-18	32.5853
NDUFA4	1.00745	11.963	8.58782	9.67288e-14	6.23735e-13	20.6273
SIAH2	1.00739	14.0301	9.66305	3.96149e-16	3.6139e-15	26.0732
LILRB3	1.00651	16.7634	13.2896	4.0807e-24	2.40373e-22	44.3265
APMAP	1.00547	16.1912	12.1629	1.13071e-21	3.27992e-20	38.7424
C4orf3	1.00501	14.6868	11.5987	1.96601e-20	4.28042e-19	35.9071
AIF1	1.00476	14.9671	12.2259	8.23246e-22	2.48566e-20	39.0575
MPZ	1.00434	11.3476	14.251	3.71193e-26	4.65883e-24	48.9915
CDA	1.00375	14.8858	9.68749	3.49447e-16	3.22462e-15	26.1976
SEMA4A	1.00372	15.261	11.2845	9.7347e-20	1.79919e-18	34.3191
B4GALT5	1.00366	15.5029	13.6756	6.11074e-25	4.73163e-23	46.2114
NOP10	1.00285	13.7591	13.3413	3.16078e-24	1.91281e-22	44.5801
DYNLT1	1.00275	13.6853	14.7762	2.97606e-27	6.28014e-25	51.4955
MYL9	1.00231	12.4896	5.01747	2.18124e-06	5.95316e-06	3.99375
SF3B6	1.00112	12.006	13.3878	2.51324e-24	1.57204e-22	44.8076
PLIN3	0.998199	14.9523	11.6588	1.44929e-20	3.27036e-19	36.2099
CD163L1	0.997672	6.38498	6.21547	1.08816e-08	3.78825e-08	9.16282
GJB6	0.997122	7.2635	5.13497	1.33009e-06	3.71787e-06	4.47343
FAM110B	0.997072	9.06977	9.3393	2.08517e-15	1.69237e-14	24.4271
HBQ1	0.996812	12.0875	5.94007	3.85496e-08	1.26976e-07	7.92442
MXD3	0.995696	13.8687	14.1672	5.5689e-26	6.25378e-24	48.589
PDCD10	0.99554	12.0432	8.96975	1.38172e-14	9.98237e-14	22.5538
SHOX2	0.994837	5.77518	7.57856	1.54205e-11	7.46081e-11	15.6154
ALOX5	0.994629	16.915	11.5705	2.26919e-20	4.86875e-19	35.7648
AC074143.1	0.993973	9.77374	11.7789	7.87706e-21	1.90268e-19	36.8152
ATP6V1C1	0.993735	13.8689	10.1551	3.16516e-17	3.5174e-16	28.5791
CDK5RAP2	0.993511	13.7263	9.59635	5.57888e-16	4.97414e-15	25.7338
NAMPT	0.993387	18.9211	9.95668	8.77009e-17	9.00118e-16	27.5683
CD58	0.991924	12.5425	11.753	8.98562e-21	2.13553e-19	36.6845
PCLAF	0.991744	6.92068	6.67861	1.23204e-09	4.7912e-09	11.3009
LRPAP1	0.99158	15.2012	14.3817	1.97566e-26	2.81027e-24	49.6174
KLF1	0.991529	10.8103	5.15981	1.19711e-06	3.36328e-06	4.57568
PRDM5	0.99047	10.4836	6.5918	1.8617e-09	7.08207e-09	10.8952
HRH2	0.989583	15.6956	10.8614	8.4556e-19	1.26953e-17	32.1734
ATP6V0E1	0.989268	15.4731	13.9541	1.56769e-25	1.49773e-23	47.5618
PRDX5	0.988424	14.9757	13.0237	1.52212e-23	7.55278e-22	43.0195
TNFSF13B	0.988139	14.7223	9.43686	1.26452e-15	1.05945e-14	24.9227
ADGRE1	0.987774	13.7738	8.64314	7.30185e-14	4.78721e-13	20.9056
CDKN2D	0.986812	14.8448	12.1094	1.48075e-21	4.19393e-20	38.4746
SULT1B1	0.983974	14.8495	9.34185	2.05805e-15	1.67319e-14	24.4401
HJURP	0.983966	7.87027	5.78972	7.60793e-08	2.43248e-07	7.25991
TNNT1	0.982513	9.83907	6.86199	5.11895e-10	2.07865e-09	12.1645
HAUS4	0.981641	12.9294	11.7361	9.78875e-21	2.29516e-19	36.5995
RNF182	0.981197	7.10224	3.81102	0.000235176	0.00051483	-0.498452
MMADHC	0.980503	13.8583	13.316	3.58131e-24	2.13577e-22	44.4561
TMEM120A	0.979888	13.797	11.7465	9.28431e-21	2.19836e-19	36.652
PECR	0.979102	11.4401	9.67294	3.76542e-16	3.44485e-15	26.1235
SH3GLB1	0.978385	15.5068	12.2574	7.02505e-22	2.16536e-20	39.215
CENPA	0.97777	6.8044	7.31639	5.6198e-11	2.54822e-10	14.3401
IL4R	0.977655	16.301	10.5911	3.3773e-18	4.48198e-17	30.7992
IL10RB	0.974427	14.9688	15.399	1.557e-28	5.53686e-26	54.4221
LY6G6C	0.973392	6.56724	10.8602	8.50956e-19	1.27564e-17	32.1671
PEX11G	0.971168	8.06285	7.06475	1.92051e-10	8.20094e-10	13.1293
HBM	0.970525	13.8947	5.40475	4.17726e-07	1.23485e-06	5.59912
B3GNT5	0.969391	12.0435	8.0348	1.58232e-12	8.66912e-12	17.8637
GBA	0.969117	13.8153	13.4156	2.19194e-24	1.40306e-22	44.9434
HIST1H2AE	0.968944	7.85462	8.00215	1.86415e-12	1.00951e-11	17.7017
ARHGAP29	0.966116	7.51821	8.9173	1.80607e-14	1.28977e-13	22.2885
CHMP5	0.963692	12.6038	10.1105	3.97935e-17	4.3051e-16	28.3521
TMEM56	0.963	8.31208	5.6059	1.72778e-07	5.3266e-07	6.45928
BATF2	0.962711	11.0258	4.37225	2.93471e-05	7.0718e-05	1.48653
MPP1	0.961915	15.384	12.0714	1.79412e-21	4.94298e-20	38.284
WIPI1	0.961443	12.8569	11.7588	8.72449e-21	2.07604e-19	36.7137
SLC16A3	0.961294	16.8424	13.7414	4.42661e-25	3.63266e-23	46.5314
MCTP2	0.96116	14.732	10.7359	1.60832e-18	2.25929e-17	31.5354
TMEM52B	0.960335	5.56249	4.78986	5.58514e-06	1.45544e-05	3.08402
CDC6	0.959991	8.43422	7.67958	9.3398e-12	4.62725e-11	16.1103
CPE	0.959836	5.53198	7.99059	1.97539e-12	1.06525e-11	17.6445
UBTD1	0.959696	12.2979	11.898	4.31034e-21	1.09486e-19	37.4138
GK	0.959481	14.8611	10.0197	6.34431e-17	6.65737e-16	27.8894
PTX3	0.959093	9.11289	6.51646	2.65952e-09	9.93207e-09	10.545
MAFG	0.955135	13.1805	12.5472	1.63939e-22	6.2587e-21	40.6597
KIF1B	0.953581	13.7013	12.0947	1.59533e-21	4.47229e-20	38.4006
NEDD4	0.95343	10.3982	7.84947	4.0045e-12	2.07441e-11	16.9464
GLT1D1	0.952434	15.4523	12.2824	6.19412e-22	1.93408e-20	39.3399
MYL12B	0.952131	15.5001	14.3596	2.19699e-26	3.03516e-24	49.512
NT5DC2	0.951929	10.1864	9.50355	8.98162e-16	7.75164e-15	25.2618
IGF2BP3	0.951781	8.88271	7.47414	2.58484e-11	1.2157e-10	15.1059
PDGFC	0.94864	9.92245	6.16662	1.36423e-08	4.69568e-08	8.94128
CREG1	0.948165	13.8678	14.2233	4.24469e-26	5.19177e-24	48.8584
PGK1	0.9479	16.796	12.8748	3.19206e-23	1.46644e-21	42.2843
ICAM5	0.947843	8.59589	8.29049	4.36377e-13	2.57521e-12	19.137
DGAT2	0.945055	15.7157	9.81203	1.84355e-16	1.78978e-15	26.8316
NDUFA1	0.944874	12.1511	14.6805	4.70166e-27	8.75359e-25	51.0418
LIMK2	0.944459	16.1701	10.9622	5.0479e-19	7.96506e-18	32.6854
VAPA	0.943904	15.0363	13.0974	1.056e-23	5.42202e-22	43.3825
HIST2H2AC	0.941617	7.60538	12.014	2.3969e-21	6.41947e-20	37.9964
PRRT4	0.941351	7.76466	4.53486	1.55449e-05	3.86568e-05	2.09709
GLRX5	0.941096	13.0613	6.24484	9.49491e-09	3.32599e-08	9.29643
ITGA2B	0.93963	13.3031	5.47187	3.11689e-07	9.35505e-07	5.88424
MTX1	0.935783	13.2653	16.2486	3.00246e-30	2.50679e-27	58.3365
PADI2	0.93508	16.1189	9.47625	1.03316e-15	8.80207e-15	25.123
MYL6B	0.934575	9.34922	11.4199	4.88269e-20	9.69621e-19	35.004
IDNK	0.934456	10.6604	7.74432	6.76692e-12	3.41511e-11	16.4284
HIST2H2BE	0.934418	13.293	8.93395	1.65889e-14	1.18864e-13	22.3727
FGR	0.933723	17.6437	12.4541	2.61433e-22	9.26253e-21	40.1964
YIPF1	0.932684	13.3619	13.9562	1.55226e-25	1.4904e-23	47.5716
2021-03-01	0.932545	13.7249	9.51468	8.48308e-16	7.35111e-15	25.3184
MS4A6A	0.932237	15.0266	12.3243	5.0177e-22	1.62214e-20	39.5491
EAF2	0.932126	8.87824	7.94629	2.46676e-12	1.31362e-11	17.425
TMCC2	0.931683	12.3344	4.84129	4.52571e-06	1.19247e-05	3.28729
NXF3	0.93136	5.52991	4.15762	6.64329e-05	0.000153904	0.704351
FBXO6	0.931004	12.3599	9.01722	1.08414e-14	7.9249e-14	22.794
ADCY3	0.930756	12.1979	6.54635	2.30895e-09	8.69559e-09	10.6838
PPM1M	0.92992	15.1365	11.9296	3.67361e-21	9.46904e-20	37.5725
SPINK8	0.929087	6.8002	9.71256	3.07245e-16	2.86548e-15	26.3252
UBE2J1	0.928515	15.0288	11.0636	3.00651e-19	4.96423e-18	33.1997
CCDC71L	0.928007	13.0943	10.5074	5.18904e-18	6.67416e-17	30.373
FCGR2A	0.927914	17.8565	11.7445	9.38231e-21	2.21609e-19	36.6416
MSRA	0.926011	12.2964	8.84324	2.63553e-14	1.8357e-13	21.9143
SKA1	0.92598	7.49694	6.2671	8.56166e-09	3.01337e-08	9.39785
GMPR	0.925797	12.6963	5.35588	5.16405e-07	1.5089e-06	5.39276
NEK2	0.925605	6.80344	6.10261	1.83272e-08	6.2312e-08	8.65212
SELL	0.924919	18.9298	12.2332	7.9367e-22	2.40772e-20	39.0938
FFAR2	0.924168	16.5698	9.13777	5.85286e-15	4.44063e-14	23.4045
HTATIP2	0.924094	13.5298	14.766	3.12388e-27	6.47197e-25	51.4474
C5orf30	0.924014	10.4736	6.57105	2.05415e-09	7.78026e-09	10.7986
CD300LD	0.923808	8.27073	4.5686	1.36015e-05	3.40179e-05	2.22562
NMI	0.922352	14.2679	14.1179	7.07479e-26	7.6745e-24	48.3514
NDST3	0.921744	5.23097	8.02976	1.62284e-12	8.87595e-12	17.8387
MSL3	0.921668	14.8752	12.0878	1.65148e-21	4.60281e-20	38.3663
ARPC3	0.920499	16.0125	14.8114	2.51608e-27	5.49048e-25	51.6621
PIM3	0.919581	14.96	12.3235	5.03845e-22	1.62338e-20	39.545
MCTP1	0.918836	13.0154	12.4524	2.63676e-22	9.29059e-21	40.1879
TYROBP	0.917812	17.1188	12.5626	1.51732e-22	5.83608e-21	40.7366
PLPPR3	0.91772	5.8326	4.13431	7.24836e-05	0.000167236	0.621103
SLC2A14	0.917452	6.4801	7.19371	1.02472e-10	4.50808e-10	13.7481
SKA3	0.917224	6.30898	6.08668	1.97195e-08	6.68325e-08	8.58042
ALDH1A2	0.915917	10.9408	9.57251	6.30505e-16	5.57183e-15	25.6125
NFIL3	0.915625	13.9984	11.6401	1.59301e-20	3.56119e-19	36.116
ZDHHC12	0.915092	13.0964	14.9382	1.37521e-27	3.26027e-25	52.2614
LHFPL5	0.913901	7.17472	10.7711	1.3426e-18	1.91545e-17	31.7146
APCDD1	0.913707	8.62104	5.68982	1.18994e-07	3.73494e-07	6.82315
B3GNT8	0.912927	13.7937	9.96031	8.60827e-17	8.83982e-16	27.5868
ROMO1	0.912774	11.2122	11.3374	7.43297e-20	1.40765e-18	34.5869
RABAC1	0.911392	14.2114	11.5454	2.57811e-20	5.44592e-19	35.6381
KCNH7	0.910155	6.48287	9.95268	8.95225e-17	9.16365e-16	27.5479
CR1L	0.908158	7.48602	7.04581	2.10555e-10	8.96119e-10	13.0388
CD24	0.906691	12.7877	4.07106	9.1689e-05	0.000209458	0.396845
HIST1H4D	0.906035	8.04121	8.55762	1.12766e-13	7.19175e-13	20.4756
PKMYT1	0.90488	9.17054	8.50346	1.48448e-13	9.33412e-13	20.2035
CCPG1	0.902098	13.4038	9.59732	5.55114e-16	4.95808e-15	25.7387
CRACR2B	0.901082	10.3454	8.68248	5.97768e-14	3.97745e-13	21.1037
RALB	0.89969	15.6102	12.1963	9.55745e-22	2.84105e-20	38.9093
CAVIN3	0.899579	8.07369	7.24543	7.95756e-11	3.53479e-10	13.9972
LIN7A	0.89933	13.4612	10.2426	2.01926e-17	2.3219e-16	29.025
SCPEP1	0.898161	14.8628	10.3185	1.36793e-17	1.61951e-16	29.4113
FES	0.897786	15.1786	12.3984	3.45703e-22	1.1897e-20	39.919
SLC25A37	0.897423	18.4204	11.3496	6.98313e-20	1.33165e-18	34.6489
SPC24	0.897034	8.14153	6.4452	3.72116e-09	1.36787e-08	10.2152
E2F8	0.896755	6.78436	5.56714	2.05067e-07	6.26058e-07	6.29222
GAS6	0.895198	10.8835	9.31035	2.41859e-15	1.94408e-14	24.2801
LHX4	0.894767	7.39761	5.67788	1.25497e-07	3.92815e-07	6.77121
TGFA	0.894616	12.8604	9.21607	3.92012e-15	3.05388e-14	23.8016
ARL8A	0.894391	14.2582	12.582	1.3774e-22	5.33902e-21	40.8326
CCRL2	0.892503	10.296	10.2149	2.32789e-17	2.64982e-16	28.8839
TOP2A	0.892417	9.67853	5.17641	1.11558e-06	3.14713e-06	4.64415
CYBA	0.891737	17.795	13.1377	8.65119e-24	4.53904e-22	43.5805
ELOB	0.890977	14.0189	11.7104	1.11504e-20	2.58912e-19	36.4702
ACOX2	0.89056	6.24412	8.27407	4.74122e-13	2.78683e-12	19.055
TMEM88	0.89049	10.3674	10.3773	1.01128e-17	1.22831e-16	29.711
RHOG	0.890419	16.3194	11.0869	2.6686e-19	4.46775e-18	33.3181
PHC2	0.889244	16.5433	9.8838	1.27517e-16	1.26417e-15	27.1971
CDADC1	0.888036	10.8047	8.56842	1.06751e-13	6.83539e-13	20.5298
GRAMD1A	0.887866	15.5815	12.6282	1.09283e-22	4.31802e-21	41.0624
TLR2	0.887175	16.1681	10.1747	2.86195e-17	3.20268e-16	28.679
DUSP1	0.886161	16.0312	9.23945	3.47779e-15	2.73481e-14	23.9202
JAK3	0.885899	16.8138	11.8396	5.79327e-21	1.43361e-19	37.1202
SIGLEC9	0.885776	14.7418	11.2778	1.00726e-19	1.85628e-18	34.2852
P4HA2	0.885641	8.44435	11.3168	8.25544e-20	1.54388e-18	34.4827
KIF2C	0.885496	8.46417	5.77634	8.07951e-08	2.57384e-07	7.20116
CDCA2	0.885442	6.94078	5.63875	1.49354e-07	4.63933e-07	6.6014
IGFBP7	0.885244	12.1342	9.33765	2.10286e-15	1.70385e-14	24.4187
FOXC1	0.885031	6.17892	6.41524	4.28379e-09	1.56719e-08	10.077
ANAPC15	0.884381	11.7511	12.6235	1.1188e-22	4.40252e-21	41.0391
TXNDC17	0.884379	11.0642	11.6235	1.73368e-20	3.82225e-19	36.032
STK3	0.883851	10.9675	9.83048	1.67688e-16	1.63874e-15	26.9256
SCN1B	0.883764	10.746	9.35834	1.89132e-15	1.54549e-14	24.5238
GBGT1	0.883131	12.4766	11.3287	7.77049e-20	1.46148e-18	34.5428
ITGA9	0.883105	7.91772	6.31324	6.90543e-09	2.46253e-08	9.60865
CXCL16	0.882961	14.342	9.56714	6.48133e-16	5.71709e-15	25.5852
TNNI2	0.882128	10.7422	9.73569	2.72839e-16	2.56956e-15	26.4429
HAT1	0.881435	11.8304	9.82369	1.73639e-16	1.69259e-15	26.891
NTNG2	0.881404	14.2679	10.6259	2.82558e-18	3.80235e-17	30.9762
HCK	0.880121	17.4456	10.8414	9.36797e-19	1.38273e-17	32.0717
CCM2L	0.879873	6.12283	6.94844	3.37399e-10	1.40331e-09	12.5746
H2AFJ	0.879326	12.2988	13.2145	5.91438e-24	3.24497e-22	43.958
PEAK3	0.878959	13.5596	9.78431	2.12553e-16	2.04594e-15	26.6905
FOXM1	0.878891	9.06654	5.74273	9.39363e-08	2.97765e-07	7.05398
DOK3	0.877803	16.4239	10.3522	1.15064e-17	1.38357e-16	29.5829
DBI	0.877735	11.885	10.425	7.91873e-18	9.85505e-17	29.9536
IMPA2	0.87729	14.4489	9.042	9.55195e-15	7.03321e-14	22.9194
COX7A2	0.877005	12.36	10.1371	3.47238e-17	3.80377e-16	28.4872
RPL26L1	0.876657	9.09122	8.9912	1.23836e-14	9.00425e-14	22.6622
ATP11B	0.875902	14.8714	8.30206	4.11611e-13	2.4373e-12	19.1948
THBS1	0.875296	11.6595	4.79733	5.41739e-06	1.41384e-05	3.11348
CEACAM4	0.874885	14.3084	9.61488	5.07272e-16	4.56588e-15	25.8281
SIL1	0.874283	11.8619	10.3221	1.34256e-17	1.59143e-16	29.4299
TBCA	0.874111	11.8944	12.6099	1.19749e-22	4.68336e-21	40.9716
SPI1	0.873527	18.0213	10.2289	2.16737e-17	2.48329e-16	28.9548
EVI2A	0.873081	13.4201	7.53734	1.89129e-11	9.06149e-11	15.414
RBX1	0.87262	12.0249	8.70365	5.36706e-14	3.59483e-13	21.2103
RAB31	0.872619	15.5487	11.451	4.16836e-20	8.45249e-19	35.1611
CDT1	0.872557	8.96831	5.83318	6.25562e-08	2.01996e-07	7.45112
XK	0.872422	10.557	4.94753	2.91931e-06	7.85368e-06	3.71145
CDC45	0.872091	7.37992	5.80393	7.13686e-08	2.28949e-07	7.32235
CKS2	0.871531	8.50313	6.78584	7.37914e-10	2.94721e-09	11.8048
KIF14	0.870938	6.78111	5.78459	7.78553e-08	2.48472e-07	7.23736
CDC25A	0.870571	7.31889	5.77105	8.27383e-08	2.63399e-07	7.17795
CAPZA1	0.870029	16.1692	10.7482	1.51004e-18	2.13372e-17	31.5979
POC1A	0.869821	9.14411	12.3966	3.48855e-22	1.1984e-20	39.91
NINJ2	0.868878	12.3814	10.5474	4.22667e-18	5.49153e-17	30.5766
CAPZA2	0.868468	14.6804	9.38417	1.65671e-15	1.36247e-14	24.655
NAA38	0.868463	11.9718	11.976	2.90545e-21	7.69075e-20	37.8054
SCN2B	0.868033	6.11284	5.67243	1.28586e-07	4.02155e-07	6.74748
TENM1	0.867664	10.4917	6.02975	2.56047e-08	8.58092e-08	8.32476
MTHFD2	0.867654	12.4897	11.1835	1.6292e-19	2.84673e-18	33.8079
HBE1	0.867619	4.95856	7.65605	1.04981e-11	5.17309e-11	15.9949
LYRM1	0.867556	12.5388	12.2311	8.02153e-22	2.42961e-20	39.0833
KIFC1	0.867499	8.8932	5.61124	1.68741e-07	5.20618e-07	6.48235
FAM90A1	0.867349	6.98076	7.86738	3.66144e-12	1.90803e-11	17.0349
PLGRKT	0.867154	11.0977	12.131	1.32787e-21	3.81722e-20	38.5828
HIST1H4H	0.867136	10.7619	8.27054	4.82644e-13	2.83372e-12	19.0374
SAMD15	0.866407	6.5566	9.57181	6.32763e-16	5.58921e-15	25.609
OAT	0.866405	13.1812	9.9205	1.05611e-16	1.06823e-15	27.384
MIIP	0.866173	13.5198	15.4938	9.97615e-29	4.076e-26	54.8635
TMA7	0.865471	12.4068	9.15247	5.4287e-15	4.14502e-14	23.4791
PSMB3	0.865076	14.8495	12.1002	1.55138e-21	4.3682e-20	38.4284
TMEM165	0.864703	13.6414	10.3142	1.39838e-17	1.65148e-16	29.3895
ZMYND15	0.864613	10.1278	8.50773	1.45269e-13	9.15522e-13	20.225
2021-09-04	0.863492	9.15812	4.64609	9.98626e-06	2.53592e-05	2.52326
HYAL2	0.863305	10.8556	11.1215	2.23607e-19	3.81004e-18	33.4936
SHKBP1	0.863251	16.5453	10.4823	5.90144e-18	7.50997e-17	30.2454
GALNT2	0.862744	14.0919	7.87478	3.52842e-12	1.8422e-11	17.0714
GABARAPL2	0.862478	14.4716	12.2658	6.73413e-22	2.07903e-20	39.257
FOSL1	0.860926	6.55862	9.7772	2.20461e-16	2.1157e-15	26.6543
AURKB	0.860922	9.09533	8.0276	1.64058e-12	8.96022e-12	17.828
NDUFAF1	0.860372	11.6487	14.243	3.85963e-26	4.81275e-24	48.9528
MISP3	0.858334	9.73834	8.51463	1.40268e-13	8.85749e-13	20.2596
COX7B	0.857956	11.0808	8.76815	3.86446e-14	2.63714e-13	21.5354
CES1	0.857072	12.2592	5.85367	5.70301e-08	1.84617e-07	7.54151
ITPKC	0.856733	12.2647	9.36968	1.78448e-15	1.46255e-14	24.5814
JPT1	0.856421	14.7574	11.385	5.83052e-20	1.13553e-18	34.8279
WSB1	0.853908	15.4564	9.97459	7.99943e-17	8.27211e-16	27.6595
LGALS3	0.853844	14.1201	9.22669	3.71258e-15	2.90753e-14	23.8555
KCNJ15	0.853703	15.819	9.4206	1.37444e-15	1.14455e-14	24.8401
FAR2	0.852756	12.7615	10.0221	6.26738e-17	6.58383e-16	27.9015
E2F1	0.852134	9.86847	7.14645	1.29053e-10	5.63227e-10	13.5209
CMBL	0.852126	7.70723	4.76123	6.27543e-06	1.62737e-05	2.97147
TPX2	0.851994	9.30358	5.57147	2.01182e-07	6.14686e-07	6.31087
SCN9A	0.851865	8.57438	7.30479	5.94888e-11	2.68791e-10	14.284
TMC5	0.85183	8.66113	5.79343	7.48221e-08	2.39428e-07	7.27618
F12	0.851088	9.76574	9.26889	2.991e-15	2.36858e-14	24.0696
FBXL5	0.849982	16.313	12.3579	4.23753e-22	1.40675e-20	39.7169
KRT1	0.849764	11.711	3.53846	0.000604089	0.00125776	-1.38867
SMCO4	0.8497	12.0512	9.67159	3.79155e-16	3.4671e-15	26.1167
ETS2	0.849583	14.3396	9.73502	2.73769e-16	2.57453e-15	26.4395
FGD4	0.849484	12.9316	8.95847	1.46367e-14	1.05388e-13	22.4967
ARL11	0.849088	13.3863	12.4533	2.62471e-22	9.28218e-21	40.1925
FZD5	0.848676	8.50248	10.3637	1.08437e-17	1.31045e-16	29.6418
NEIL3	0.848664	6.2801	5.5158	2.57076e-07	7.76931e-07	6.07191
JDP2	0.848543	13.548	11.3883	5.73494e-20	1.12033e-18	34.8443
AKR1C1	0.847764	8.03421	4.9221	3.24393e-06	8.68682e-06	3.60938
PLTP	0.847133	9.87112	8.65375	6.91835e-14	4.55913e-13	20.959
EBI3	0.844054	6.97637	3.90426	0.000168543	0.000374555	-0.182468
CKAP2L	0.843913	6.99073	5.54224	2.28857e-07	6.95039e-07	6.18523
GPR37L1	0.842824	7.84605	9.33991	2.0786e-15	1.68775e-14	24.4302
CTNNAL1	0.842524	9.09692	6.2367	9.86096e-09	3.44792e-08	9.25935
CEBPE	0.841663	11.3303	5.48918	2.88931e-07	8.6951e-07	5.95809
ATP8B4	0.841064	11.7808	6.74858	8.82082e-10	3.48746e-09	11.6293
IFNGR2	0.839995	15.9835	12.979	1.90127e-23	9.26652e-22	42.7987
FPR2	0.83916	16.1251	9.74385	2.61644e-16	2.47627e-15	26.4844
CTSL	0.839118	11.3031	6.94276	3.46793e-10	1.43957e-09	12.5476
SELENOT	0.83845	14.1688	9.47893	1.0191e-15	8.69765e-15	25.1366
PGF	0.838431	5.24884	3.88463	0.000180869	0.000400788	-0.249479
FTL	0.838388	19.4938	10.841	9.38632e-19	1.38437e-17	32.0698
CSGALNACT2	0.83721	14.1978	8.66362	6.57972e-14	4.34941e-13	21.0087
LILRB4	0.835617	12.6941	9.5746	6.23789e-16	5.5201e-15	25.6231
CNGA4	0.835136	7.18476	8.85144	2.52754e-14	1.76239e-13	21.9558
CD14	0.834549	16.4765	8.66756	6.449e-14	4.26888e-13	21.0285
MUC1	0.834432	7.809	9.27459	2.90489e-15	2.30793e-14	24.0986
CD44	0.833704	16.944	9.9665	8.33885e-17	8.59533e-16	27.6183
CDCA3	0.832865	7.82425	6.27066	8.42089e-09	2.96709e-08	9.41411
HPSE	0.832857	13.6733	8.61935	8.24071e-14	5.3661e-13	20.7859
LOXHD1	0.832527	10.128	6.81675	6.36218e-10	2.55663e-09	11.9506
TRIM25	0.83227	16.3967	12.3292	4.89499e-22	1.58781e-20	39.5737
GLIPR2	0.832074	16.3062	15.0096	9.79815e-28	2.47571e-25	52.5977
ZMAT2	0.831445	14.0229	15.4395	1.28719e-28	4.68348e-26	54.6108
CSF2RA	0.831436	14.8513	11.1263	2.18264e-19	3.72562e-18	33.5176
SLC49A4	0.83073	11.8701	10.7671	1.37064e-18	1.95255e-17	31.6941
YOD1	0.830585	12.5235	7.27055	7.03642e-11	3.15407e-10	14.1185
NANS	0.830491	12.3321	12.06	1.90029e-21	5.19819e-20	38.2269
SERF2	0.829203	16.4555	10.3826	9.84381e-18	1.19791e-16	29.7377
EXT1	0.829177	11.8325	10.493	5.58655e-18	7.13288e-17	30.2998
NARF	0.828553	14.9274	14.5212	1.00937e-26	1.57585e-24	50.2838
DRC1	0.828507	6.86748	7.41281	3.49779e-11	1.61929e-10	14.8076
ASPM	0.828278	7.96026	4.8004	5.35009e-06	1.3976e-05	3.12556
PIWIL4	0.828117	9.64059	7.70068	8.40905e-12	4.18665e-11	16.2139
ACAA1	0.827849	14.8301	17.6043	6.64915e-33	1.82405e-29	64.3906
PRR13	0.826179	15.3954	11.653	1.49259e-20	3.36015e-19	36.1806
NUSAP1	0.826124	9.92302	6.521	2.60306e-09	9.74208e-09	10.566
PTGES	0.825694	8.48762	5.12067	1.4131e-06	3.94244e-06	4.41469
COL23A1	0.825286	6.93289	7.82546	4.51467e-12	2.3224e-11	16.828
GALK1	0.825135	12.7446	11.9029	4.20479e-21	1.07231e-19	37.4384
CCR1	0.824424	15.1047	8.86933	2.30709e-14	1.62164e-13	22.0461
PQLC1	0.8235	14.1276	12.9937	1.7671e-23	8.65653e-22	42.8714
PYCARD	0.822732	14.9261	11.4851	3.50287e-20	7.22509e-19	35.3337
MAP3K20	0.821854	11.826	12.0034	2.52884e-21	6.74462e-20	37.9432
RASL11A	0.82113	9.70523	9.5896	5.77555e-16	5.137e-15	25.6995
ARRB2	0.819665	17.7009	13.3881	2.51008e-24	1.57204e-22	44.8089
PLPP3	0.819269	7.42965	7.84166	4.16377e-12	2.15054e-11	16.9079
RTN3	0.818733	16.8019	11.0675	2.94622e-19	4.87307e-18	33.2199
MMP25	0.818169	18.0459	9.85895	1.4488e-16	1.42381e-15	27.0705
TMEM70	0.818132	11.6826	10.8704	8.07651e-19	1.2181e-17	32.219
TMCO3	0.818017	13.4479	10.3869	9.62729e-18	1.17305e-16	29.7598
SLA	0.81762	16.616	9.46386	1.10096e-15	9.32171e-15	25.06
PPP1R3D	0.817544	13.49	10.4341	7.55734e-18	9.442e-17	30
COX7C	0.816917	12.3628	7.71726	7.74304e-12	3.88475e-11	16.2954
MCM10	0.816287	7.0504	4.9084	3.43311e-06	9.16402e-06	3.55453
LILRB5	0.816093	7.34254	5.74135	9.45197e-08	2.99466e-07	7.04794
VWA5A	0.815578	11.1345	6.63075	1.54729e-09	5.9461e-09	11.077
CASP4	0.814987	15.5399	11.4636	3.90769e-20	7.99141e-19	35.2252
P2RX1	0.813675	14.1804	8.63792	7.49834e-14	4.90933e-13	20.8793
BUB1B	0.813579	7.40661	5.23025	8.8668e-07	2.52662e-06	4.86719
AREG	0.813277	6.02846	5.55248	2.1876e-07	6.66062e-07	6.22921
IFI27L2	0.813095	10.6191	10.8111	1.09417e-18	1.59057e-17	31.9176
2021-03-02	0.812965	14.1824	9.50723	8.81365e-16	7.61694e-15	25.2805
PLAU	0.812372	8.53284	6.02371	2.6322e-08	8.8121e-08	8.29771
IFIT1B	0.812199	10.6202	3.75742	0.000284147	0.000615477	-0.677512
RAB19	0.812078	8.00306	6.83296	5.88576e-10	2.37446e-09	12.0272
MRPL13	0.811667	9.70017	7.82337	4.56218e-12	2.34495e-11	16.8177
ZDHHC20	0.811582	14.632	8.19352	7.11877e-13	4.09532e-12	18.6532
SRA1	0.81149	13.3482	13.737	4.52303e-25	3.69599e-23	46.51
SHCBP1	0.809524	8.79387	6.6464	1.43626e-09	5.5438e-09	11.1501
TPST2	0.80892	14.7761	11.2617	1.09338e-19	1.99963e-18	34.2038
EGFL7	0.807919	9.14249	7.4189	3.3944e-11	1.57408e-10	14.8371
CTSA	0.807743	15.4304	10.3297	1.29128e-17	1.53348e-16	29.4685
MOSPD3	0.807223	11.7899	9.61197	5.14927e-16	4.62495e-15	25.8132
GPR27	0.806992	13.4561	9.52443	8.0694e-16	7.01479e-15	25.3679
RNF144B	0.806915	13.9254	8.78041	3.63043e-14	2.4845e-13	21.5973
PLA2G4A	0.8069	10.2702	10.7769	1.30312e-18	1.86328e-17	31.7442
GPRIN1	0.806626	8.71991	10.3041	1.47284e-17	1.73302e-16	29.338
EIF1B	0.806452	13.72	12.3848	3.70157e-22	1.25585e-20	39.8511
GM2A	0.805761	14.2579	8.89997	1.97319e-14	1.40234e-13	22.2009
STK16	0.805737	12.46	14.6208	6.25954e-27	1.0829e-24	50.7578
ELL2	0.805419	11.8397	10.1176	3.8374e-17	4.17268e-16	28.3881
GADD45B	0.805334	14.2571	10.2453	1.99188e-17	2.29592e-16	29.0385
B2M	0.804814	19.8668	10.0635	5.0668e-17	5.39344e-16	28.1124
GNA15	0.804732	12.8015	12.2412	7.62176e-22	2.3195e-20	39.134
SLC36A1	0.804731	13.3478	9.68013	3.62895e-16	3.32951e-15	26.1601
BUB1	0.803653	8.99204	5.03298	2.04408e-06	5.59629e-06	4.05669
FTH1	0.802913	19.3746	8.45799	1.86951e-13	1.16257e-12	19.9754
CLTCL1	0.802781	11.0919	7.50693	2.19826e-11	1.04462e-10	15.2656
ANG	0.802306	8.17435	8.53259	1.28047e-13	8.12319e-13	20.3498
NEDD8	0.802297	12.5778	13.4591	1.769e-24	1.17138e-22	45.1562
SDF2	0.80116	13.2879	14.2642	3.48359e-26	4.45969e-24	49.0545
RTN2	0.800697	11.5085	9.94313	9.40222e-17	9.57829e-16	27.4993
LAMTOR1	0.80052	14.7502	13.5407	1.18443e-24	8.30093e-23	45.5545
ATG3	0.799502	14.2186	13.2832	4.21146e-24	2.45814e-22	44.2952
ICA1	0.799405	9.44965	8.12343	1.01335e-12	5.70993e-12	18.3041
VIM	0.799241	18.5052	10.5327	4.55615e-18	5.89169e-17	30.5021
ROGDI	0.799228	13.3371	8.77194	3.79068e-14	2.58864e-13	21.5545
CLEC12A	0.797837	14.3843	5.41906	3.92497e-07	1.16457e-06	5.65976
CCNE2	0.796678	8.21188	6.70298	1.09683e-09	4.28358e-09	11.4151
NATD1	0.795734	14.9167	9.22251	3.79306e-15	2.96572e-14	23.8342
LAPTM4A	0.794343	14.6458	13.518	1.32401e-24	9.14564e-23	45.4439
SLC40A1	0.794162	14.6627	9.44872	1.1899e-15	9.99983e-15	24.983
ID1	0.792099	5.72604	8.05492	1.43015e-12	7.8872e-12	17.9636
RNF149	0.791807	17.1808	11.5478	2.54633e-20	5.39704e-19	35.6504
JUNB	0.791767	16.5266	11.1402	2.03268e-19	3.48825e-18	33.5883
TEAD3	0.791529	6.70749	5.58102	1.92878e-07	5.90629e-07	6.35197
TTK	0.791516	7.1514	4.87914	3.87368e-06	1.028e-05	3.43772
CTSB	0.791485	16.8342	11.2747	1.02347e-19	1.88434e-18	34.2694
PSMA4	0.790374	13.1976	9.39897	1.53566e-15	1.27054e-14	24.7302
DPY19L3	0.790214	12.7354	7.55465	1.73596e-11	8.35691e-11	15.4986
MELK	0.790164	7.16364	5.07441	1.71767e-06	4.74802e-06	4.22536
C4orf48	0.788961	11.3465	10.8939	7.15832e-19	1.09096e-17	32.3387
GRN	0.788631	17.2582	9.39741	1.54803e-15	1.27967e-14	24.7223
UBE2D1	0.788425	14.4934	10.217	2.30395e-17	2.62569e-16	28.8941
ANKRD35	0.787979	7.5941	7.05683	1.99591e-10	8.51155e-10	13.0914
MKI67	0.787974	10.2521	4.7127	7.63887e-06	1.96608e-05	2.78169
DNASE1L1	0.787885	13.4322	12.1873	1.00007e-21	2.95907e-20	38.8643
LPCAT2	0.787725	14.7861	8.67596	6.17926e-14	4.10163e-13	21.0708
CD151	0.786773	13.2812	9.79381	2.02432e-16	1.95464e-15	26.7388
CYBC1	0.786284	16.5038	15.4639	1.14768e-28	4.49775e-26	54.7245
GINS2	0.785303	8.07284	5.2281	8.94858e-07	2.54842e-06	4.85827
HHEX	0.784797	13.8948	10.1523	3.21112e-17	3.56228e-16	28.5648
TRIM6	0.78469	7.75724	5.87429	5.19545e-08	1.69025e-07	7.63262
GTSE1	0.784569	8.13409	5.5117	2.61752e-07	7.90816e-07	6.05434
DOC2B	0.784231	7.79381	3.71273	0.000332237	0.00071404	-0.825321
C8orf88	0.783847	7.96125	7.96726	2.22066e-12	1.18916e-11	17.5288
ZNF787	0.783823	14.0832	11.8954	4.36685e-21	1.10775e-19	37.4009
TMC4	0.783353	9.60643	6.99257	2.72548e-10	1.14549e-09	12.7847
S100A4	0.782244	17.1922	10.0109	6.63806e-17	6.95042e-16	27.8445
ATP5PF	0.782028	11.2343	11.5805	2.15702e-20	4.66456e-19	35.8151
LYVE1	0.781888	8.54603	6.98984	2.76182e-10	1.16e-09	12.7717
APOBR	0.781349	16.2571	7.91022	2.95513e-12	1.56028e-11	17.2466
SECTM1	0.781013	16.2141	6.70913	1.06509e-09	4.16726e-09	11.444
AIG1	0.780573	11.098	9.96466	8.4179e-17	8.66285e-16	27.609
EPAS1	0.780423	10.1822	5.39834	4.29528e-07	1.26779e-06	5.572
TLR8	0.780229	15.3491	8.79659	3.34311e-14	2.30017e-13	21.6789
H2AFZ	0.779573	14.4922	12.5234	1.84688e-22	6.9269e-21	40.5414
UBE2F	0.779149	11.7026	10.4777	6.04159e-18	7.66799e-17	30.2221
DHRS7	0.778985	14.9725	11.388	5.74466e-20	1.12109e-18	34.8427
BLVRB	0.777288	14.4584	6.24272	9.58885e-09	3.35645e-08	9.28678
CEBPA	0.776994	14.4877	11.1919	1.56146e-19	2.74838e-18	33.8501
COX8A	0.776965	13.3606	12.4895	2.18846e-22	8.05077e-21	40.3729
COX6C	0.776927	10.9262	7.72342	7.50924e-12	3.7719e-11	16.3256
HEPACAM2	0.776656	6.40935	4.11909	7.67183e-05	0.000176666	0.5669
PRSS36	0.776217	9.52029	10.1168	3.85267e-17	4.18692e-16	28.3841
TNFSF10	0.775967	15.3753	11.341	7.29627e-20	1.38586e-18	34.6053
COX6A1	0.77543	11.9273	13.544	1.16538e-24	8.19739e-23	45.5706
MFSD13A	0.774735	11.5466	11.8743	4.8604e-21	1.22325e-19	37.2946
TYMP	0.773839	16.765	8.78871	3.48005e-14	2.38499e-13	21.6391
AUNIP	0.773241	5.59499	6.23209	1.0074e-08	3.51667e-08	9.2384
CITED4	0.773224	10.8409	6.99474	2.69698e-10	1.13426e-09	12.7951
BEST1	0.773193	15.7159	8.43221	2.1304e-13	1.3129e-12	19.8462
TMEM11	0.773028	12.1529	13.8522	2.57613e-25	2.29025e-23	47.0688
ZDHHC3	0.772546	14.1003	13.1654	7.54139e-24	4.0227e-22	43.7168
FAM209B	0.77245	8.2383	9.91627	1.0793e-16	1.08797e-15	27.3625
HSPA6	0.771866	15.7788	9.91203	1.10305e-16	1.109e-15	27.3409
UQCRQ	0.77177	11.5094	8.75212	4.19325e-14	2.84936e-13	21.4546
TMEM45A	0.771689	5.69377	6.1554	1.43682e-08	4.93052e-08	8.89049
HIST1H2BG	0.771458	9.238	7.01386	2.45841e-10	1.03756e-09	12.8862
JSRP1	0.771457	14.3632	8.32367	3.69007e-13	2.20269e-12	19.3029
BCL3	0.771202	14.8748	9.86359	1.41466e-16	1.3924e-15	27.0942
SLC22A16	0.770665	8.27011	7.34244	4.94492e-11	2.25605e-10	14.4662
CLEC6A	0.770363	8.06285	6.00987	2.80422e-08	9.34887e-08	8.23576
UCHL1	0.770281	5.11117	3.94559	0.000145163	0.000324779	-0.0405844
GNS	0.770182	15.6937	10.4171	8.24546e-18	1.02418e-16	29.9135
EMB	0.770054	15.5554	8.71944	4.95264e-14	3.34055e-13	21.2898
TMEM260	0.76986	12.6495	9.60777	5.2613e-16	4.71675e-15	25.7919
PFKFB4	0.769181	14.6648	10.7255	1.69603e-18	2.37037e-17	31.4827
KIAA0930	0.768995	15.2046	9.55589	6.86627e-16	6.0317e-15	25.528
CHMP2A	0.768067	14.944	10.1672	2.97506e-17	3.32151e-16	28.6406
TMEM91	0.768051	13.2709	11.1136	2.32832e-19	3.95671e-18	33.4535
CSTB	0.767067	14.1848	12.2852	6.10647e-22	1.90981e-20	39.3541
ZNF608	0.766725	9.49395	4.36199	3.05327e-05	7.34369e-05	1.44854
OPRL1	0.766479	12.8043	11.0023	4.11245e-19	6.54821e-18	32.8888
SPTA1	0.766456	8.29758	4.51957	1.65121e-05	4.09349e-05	2.03902
CREB5	0.766176	15.4944	9.78298	2.14006e-16	2.05581e-15	26.6837
MICAL1	0.7661	15.6775	13.1414	8.49117e-24	4.46729e-22	43.599
MEF2A	0.766061	13.8874	8.68945	5.76926e-14	3.84811e-13	21.1388
SGIP1	0.765552	6.45203	4.4943	1.82381e-05	4.49181e-05	1.9434
SLC9A4	0.765393	4.68806	7.43561	3.12601e-11	1.45559e-10	14.9184
SLC5A9	0.765371	8.49066	5.54411	2.26984e-07	6.89569e-07	6.19324
PTTG1	0.765338	9.5038	6.37113	5.26823e-09	1.90663e-08	9.87408
MLKL	0.764976	14.2452	11.6368	1.62014e-20	3.60396e-19	36.0992
COX5B	0.764653	13.9493	13.9957	1.28035e-25	1.25442e-23	47.7627
APOBEC3A	0.764562	15.9986	10.1461	3.31528e-17	3.66092e-16	28.5332
CCNA2	0.763805	9.33249	5.68472	1.21732e-07	3.81615e-07	6.80094
CATIP	0.763333	8.04261	8.65259	6.95932e-14	4.58141e-13	20.9532
FABP2	0.76268	4.06465	4.02304	0.000109436	0.000248024	0.228235
ACVRL1	0.762154	8.76092	7.85685	3.85931e-12	2.00244e-11	16.9829
SRP14	0.761741	14.084	11.9034	4.19306e-21	1.07074e-19	37.4412
PAPSS1	0.761735	13.498	9.18711	4.54658e-15	3.50916e-14	23.6547
CYB5R1	0.761568	13.0415	9.68631	3.51559e-16	3.23943e-15	26.1916
DNTTIP1	0.761473	13.5894	12.1204	1.40093e-21	4.00821e-20	38.5296
DIAPH3	0.76125	5.90401	5.61954	1.62641e-07	5.02606e-07	6.51826
IDH1	0.760573	13.2323	13.7517	4.21016e-25	3.4999e-23	46.5812
ACVR1B	0.760402	12.8041	9.24016	3.46525e-15	2.72606e-14	23.9238
RAB27A	0.760375	15.233	11.5175	2.97095e-20	6.18106e-19	35.4973
ARID5A	0.760373	14.5964	9.89082	1.23005e-16	1.22514e-15	27.2328
TRIQK	0.759469	11.778	8.23644	5.7332e-13	3.33822e-12	18.8672
ALPK1	0.758534	14.6769	11.0196	3.76473e-19	6.05478e-18	32.9765
H3F3A	0.758383	17.9714	11.1522	1.91189e-19	3.28979e-18	33.6491
FAM200B	0.757713	12.2116	11.6536	1.48774e-20	3.35318e-19	36.1839
CHIC2	0.757552	13.1244	11.5721	2.2514e-20	4.84139e-19	35.7726
PSENEN	0.757001	12.0779	12.2401	7.66389e-22	2.32863e-20	39.1285
LAIR1	0.756464	14.7364	6.78079	7.5599e-10	3.01439e-09	11.781
ARNTL2	0.755987	8.07615	8.06962	1.32833e-12	7.36158e-12	18.0366
ACSL4	0.755796	14.5489	7.79663	5.21358e-12	2.66196e-11	16.6859
PAGE2B	0.755736	6.73048	4.24193	4.83408e-05	0.000113413	1.00832
VPS25	0.755511	12.4869	12.8106	4.3956e-23	1.9449e-21	41.9667
C1orf122	0.754951	11.8265	11.0477	3.2613e-19	5.33447e-18	33.119
RPL41	0.754836	14.8743	7.07942	1.78844e-10	7.66764e-10	13.1995
TMEM158	0.754533	9.38947	4.83938	4.56126e-06	1.20134e-05	3.27972
OSTF1	0.753637	15.372	12.0167	2.36525e-21	6.35243e-20	38.0096
MYD88	0.753339	16.2518	13.3771	2.64907e-24	1.64628e-22	44.7554
CHCHD1	0.753103	11.3796	10.819	1.05044e-18	1.53396e-17	31.9581
NFKBIA	0.752924	15.064	9.41423	1.42012e-15	1.17952e-14	24.8077
TMEM59	0.752295	15.1524	14.041	1.02723e-25	1.04925e-23	47.9813
C1RL	0.751985	14.9884	11.8013	7.03238e-21	1.7181e-19	36.9278
SMIM10	0.751457	6.0128	7.20691	9.60753e-11	4.23733e-10	13.8116
TNFRSF12A	0.751371	10.1708	10.2099	2.38882e-17	2.70635e-16	28.8583
LACTB	0.751236	13.0188	11.2041	1.46684e-19	2.60329e-18	33.9121
GPAT3	0.751225	13.7426	8.77149	3.7993e-14	2.5936e-13	21.5523
LAMB3	0.751011	7.77047	5.81373	6.82888e-08	2.1973e-07	7.36545
VSIR	0.750663	18.3145	10.1112	3.96634e-17	4.29587e-16	28.3553
TREML1	0.750279	11.9678	4.93273	3.10421e-06	8.33242e-06	3.652
CENPM	0.749248	7.97438	4.91044	3.40426e-06	9.09333e-06	3.5627
AP3S1	0.749196	12.8624	11.072	2.87962e-19	4.78351e-18	33.2425
TOR4A	0.7488	14.1759	11.4305	4.62633e-20	9.27342e-19	35.0576
SFT2D1	0.748261	13.2035	12.3511	4.38534e-22	1.44694e-20	39.6828
COMMD8	0.7482	10.9106	6.76795	8.03965e-10	3.19506e-09	11.7205
GTDC1	0.74782	12.1032	8.31281	3.8983e-13	2.3169e-12	19.2486
EFEMP2	0.747672	10.4907	9.29085	2.67272e-15	2.13851e-14	24.1811
C2CD4B	0.747234	4.87734	6.87508	4.80644e-10	1.96045e-09	12.2264
TUBA4A	0.746977	15.3132	10.1697	2.93714e-17	3.283e-16	28.6533
PFDN5	0.746721	13.8614	8.91467	1.83057e-14	1.30581e-13	22.2752
SMIM26	0.74666	10.864	12.1702	1.08976e-21	3.17993e-20	38.779
ARPC4	0.746592	15.9333	12.1757	1.06031e-21	3.10858e-20	38.8062
UBAP1	0.74639	14.6774	11.7681	8.32239e-21	2.00019e-19	36.7606
TBKBP1	0.745975	13.9448	9.05985	8.71886e-15	6.46442e-14	23.0098
SLC26A6	0.745269	12.159	9.9139	1.09252e-16	1.10014e-15	27.3504
HIGD1A	0.744422	10.9441	7.49292	2.35586e-11	1.11381e-10	15.1973
ACKR1	0.744094	8.24269	3.95431	0.000140643	0.000315289	-0.0105055
MSRB3	0.743714	10.2356	7.79013	5.38536e-12	2.74529e-11	16.6539
SUCNR1	0.743678	7.83094	4.5061	1.74118e-05	4.30043e-05	1.98799
CCNDBP1	0.742814	15.1129	11.9553	3.22551e-21	8.42715e-20	37.7016
SGMS2	0.74237	11.5371	7.06377	1.92973e-10	8.23664e-10	13.1246
TRIM71	0.742005	6.46907	5.69472	1.16421e-07	3.65837e-07	6.84448
EMC2	0.741395	10.8478	8.60884	8.69329e-14	5.63977e-13	20.733
CKLF	0.741026	11.1421	11.541	2.63637e-20	5.53897e-19	35.6159
COX6B1	0.740578	13.8146	12.7309	6.54159e-23	2.78532e-21	41.5719
SAPCD2	0.739812	9.79737	6.28167	8.00011e-09	2.82921e-08	9.46436
CRISPLD2	0.738536	14.6619	6.80517	6.72596e-10	2.69755e-09	11.8959
ATP5MG	0.738443	13.2793	11.303	8.85696e-20	1.65126e-18	34.4129
POLE4	0.738211	11.4152	11.0152	3.8492e-19	6.18029e-18	32.9545
TFPI	0.73794	6.76048	6.2905	7.67783e-09	2.72225e-08	9.50468
GCLM	0.73739	12.039	8.02126	1.6936e-12	9.23924e-12	17.7965
ATP5MF	0.737196	12.4642	12.8214	4.16454e-23	1.84692e-21	42.0203
AP5B1	0.736747	15.5205	10.5971	3.27558e-18	4.35904e-17	30.8295
IL18	0.736631	10.5979	9.90278	1.15672e-16	1.15851e-15	27.2938
PRCP	0.735874	14.9267	11.6758	1.32891e-20	3.03077e-19	36.296
MNDA	0.735699	18.5471	11.4206	4.86461e-20	9.67029e-19	35.0077
SLC12A9	0.735319	16.3949	11.8407	5.76099e-21	1.42746e-19	37.1258
TMEM54	0.735298	5.07114	6.45853	3.49499e-09	1.28793e-08	10.2768
CDC42EP3	0.73519	15.2683	9.66035	4.0168e-16	3.65394e-15	26.0595
IFI30	0.73502	10.038	10.949	5.40089e-19	8.48024e-18	32.6183
FLT3	0.73476	10.2442	5.41368	4.01799e-07	1.19066e-06	5.63696
CCDC17	0.734548	10.6807	10.2824	1.64647e-17	1.92435e-16	29.2274
DDX60L	0.734512	15.0141	8.58403	9.86111e-14	6.35233e-13	20.6083
UQCRH	0.734043	12.2418	10.1428	3.37233e-17	3.71323e-16	28.5162
RHCE	0.733843	7.55884	4.86876	4.04281e-06	1.07067e-05	3.39639
BCL2L15	0.733821	8.83015	4.21922	5.26832e-05	0.000123225	0.926017
LRRFIP2	0.733133	13.2925	13.3569	2.92717e-24	1.79586e-22	44.6563
SIRPA	0.732635	16.4953	9.97907	7.8172e-17	8.09674e-16	27.6824
PRSS27	0.731792	7.22237	8.55838	1.12332e-13	7.16833e-13	20.4794
LAMTOR2	0.731587	12.5411	12.1945	9.644e-22	2.86235e-20	38.9004
PGM2	0.73134	13.4656	9.26983	2.97673e-15	2.3604e-14	24.0744
OTULINL	0.730698	13.0564	8.76673	3.89252e-14	2.65535e-13	21.5283
HEBP2	0.729469	14.086	12.5404	1.6965e-22	6.43833e-21	40.6257
SFXN5	0.729212	12.9297	10.7389	1.58379e-18	2.23136e-17	31.5506
OIP5	0.729044	6.31443	5.91852	4.25162e-08	1.39276e-07	7.82864
ERH	0.729022	12.7328	9.07901	7.90506e-15	5.89747e-14	23.1068
PLEK2	0.728908	9.39996	3.83696	0.000214474	0.000471176	-0.41113
ATP6V0D1	0.728456	15.9498	9.69073	3.43676e-16	3.17595e-15	26.2141
PDE1B	0.728329	11.7112	10.222	2.24465e-17	2.56572e-16	28.92
SLC6A9	0.728213	8.05296	4.54289	1.50593e-05	3.74882e-05	2.12762
ZYX	0.727908	17.4595	8.39388	2.58686e-13	1.5775e-12	19.6542
LSM1	0.727831	11.1472	9.91918	1.06329e-16	1.07408e-15	27.3773
COLGALT1	0.727287	15.0669	9.51521	8.46023e-16	7.33462e-15	25.3211
GALNT3	0.727072	12.7955	8.84129	2.66177e-14	1.85196e-13	21.9045
FRAT2	0.72707	16.4997	10.0051	6.83751e-17	7.15535e-16	27.8152
COL9A3	0.727065	11.2276	4.61976	1.10953e-05	2.80161e-05	2.42177
HSPA1A	0.726946	15.1025	7.43005	3.21283e-11	1.49312e-10	14.8914
ZWINT	0.726697	8.77985	4.93717	3.04751e-06	8.18825e-06	3.66984
ALDH3B1	0.7266	14.02	8.89037	2.07224e-14	1.46568e-13	22.1524
GBP6	0.726458	8.46268	3.7229	0.000320655	0.000690385	-0.791796
IGSF6	0.726421	16.2744	8.96997	1.38023e-14	9.97534e-14	22.5548
CATSPER1	0.726319	9.8401	8.3915	2.61814e-13	1.59506e-12	19.6423
RPL22L1	0.726278	9.19123	6.01049	2.79618e-08	9.32854e-08	8.23857
CAMKK2	0.725684	15.489	12.5675	1.48106e-22	5.71102e-21	40.7606
GLA	0.725514	12.2618	11.6842	1.27369e-20	2.91522e-19	36.3381
F8	0.72543	10.1457	9.47804	1.02373e-15	8.73332e-15	25.1321
ARPC1B	0.725113	12.2526	14.1823	5.17715e-26	5.91766e-24	48.6614
WASF1	0.723425	8.58836	8.88286	2.15321e-14	1.51792e-13	22.1145
MAP2K3	0.723214	15.9819	10.4449	7.14957e-18	8.95001e-17	30.055
HOMER3	0.723122	11.7488	9.49194	9.53267e-16	8.1831e-15	25.2028
ACSS3	0.722736	9.11625	9.92045	1.05641e-16	1.06823e-15	27.3837
SVBP	0.722445	11.1154	11.0339	3.49985e-19	5.66973e-18	33.0489
SBNO2	0.721813	16.5493	11.3319	7.64579e-20	1.44262e-18	34.5589
SEC61G	0.721631	12.0653	11.6433	1.56752e-20	3.50828e-19	36.132
CAMSAP3	0.721298	6.68732	4.90577	3.47062e-06	9.2603e-06	3.54402
MAD2L2	0.721146	12.0404	12.632	1.07233e-22	4.24577e-21	41.0812
PIMREG	0.720906	6.01571	6.00998	2.80281e-08	9.34741e-08	8.23625
NDUFS4	0.720619	9.34606	8.43883	2.06011e-13	1.27081e-12	19.8794
TGM2	0.720566	10.0215	5.41002	4.08256e-07	1.20816e-06	5.62144
GNG10	0.720547	6.69699	8.1921	7.1702e-13	4.11873e-12	18.646
RGS19	0.720318	15.6307	12.0845	1.67894e-21	4.6641e-20	38.3499
RALGAPA2	0.720303	14.1522	9.39899	1.53548e-15	1.27054e-14	24.7303
GDF15	0.719264	5.87387	7.08161	1.76944e-10	7.59299e-10	13.21
EBPL	0.71909	10.9564	10.2412	2.03436e-17	2.33787e-16	29.0176
CETP	0.718508	8.02385	8.32075	3.74491e-13	2.23195e-12	19.2883
RILPL2	0.718256	14.7088	12.6779	8.52436e-23	3.51273e-21	41.3091
ARL4A	0.71805	10.3808	5.83834	6.1118e-08	1.97584e-07	7.47386
FABP5	0.718032	9.24578	8.78735	3.50427e-14	2.40073e-13	21.6323
TOM1	0.717963	14.5044	10.0727	4.83194e-17	5.15201e-16	28.1595
FAM160A2	0.717685	14.0921	11.3551	6.7926e-20	1.29789e-18	34.6763
P2RY13	0.717587	16.0691	10.0966	4.27416e-17	4.59042e-16	28.2812
MT1F	0.717403	10.1074	10.4834	5.86799e-18	7.47235e-17	30.251
TMEM208	0.717317	11.8034	12.4048	3.34857e-22	1.15444e-20	39.9506
CGAS	0.716705	12.2898	11.3127	8.42841e-20	1.57442e-18	34.4621
EIF4E3	0.716668	14.8486	10.6285	2.78818e-18	3.75993e-17	30.9894
HSBP1	0.716108	13.018	11.6336	1.64681e-20	3.65591e-19	36.083
ICAM1	0.715465	13.5071	8.36863	2.9395e-13	1.77899e-12	19.5278
CD53	0.715383	17.3707	11.785	7.64011e-21	1.85244e-19	36.8455
CDK5	0.715207	10.886	9.82473	1.72711e-16	1.68439e-15	26.8963
S1PR4	0.71477	16.1442	10.6622	2.34577e-18	3.19474e-17	31.1608
KIFC3	0.714526	11.3332	6.58624	1.91144e-09	7.25688e-09	10.8693
ARL3	0.714457	10.7885	11.8194	6.41628e-21	1.57762e-19	37.0188
PRKCD	0.714404	16.015	10.7776	1.29874e-18	1.85839e-17	31.7475
TALDO1	0.713939	17.2461	8.84034	2.67476e-14	1.85965e-13	21.8997
RNF181	0.713755	12.6758	14.0339	1.06336e-25	1.07472e-23	47.947
NFE4	0.713575	10.9795	6.08609	1.97737e-08	6.69865e-08	8.57773
TSEN34	0.713226	14.7111	9.28514	2.75213e-15	2.19564e-14	24.1521
ZNF467	0.713117	15.2623	8.51471	1.40212e-13	8.8569e-13	20.26
OAZ1	0.713093	18.0224	9.94968	9.09104e-17	9.2958e-16	27.5327
CSRNP1	0.713015	13.7304	8.32735	3.62213e-13	2.16415e-12	19.3212
DHRS12	0.712806	12.7023	9.76245	2.37804e-16	2.26966e-15	26.5792
SELENBP1	0.712475	13.3206	3.1692	0.00201008	0.00392232	-2.51098
PAQR6	0.711425	11.2005	5.8652	5.41355e-08	1.75751e-07	7.59243
SIGLEC11	0.711245	8.42167	5.27742	7.24337e-07	2.08412e-06	5.06371
ARHGAP24	0.710892	11.3879	8.44364	2.01054e-13	1.24262e-12	19.9035
WDFY3	0.710759	14.2673	7.89454	3.19634e-12	1.68024e-11	17.1691
HOOK2	0.710195	13.0812	11.1673	1.77008e-19	3.05673e-18	33.7256
SLC9A8	0.710154	14.4903	11.3343	7.55283e-20	1.42894e-18	34.571
NDUFS5	0.710124	11.3912	9.18601	4.57225e-15	3.52756e-14	23.6492
GCKR	0.709778	4.60185	8.1744	7.83928e-13	4.47763e-12	18.5578
KLF5	0.709745	10.2325	6.74367	9.0301e-10	3.5658e-09	11.6063
EDEM2	0.709584	13.5948	14.8754	1.85449e-27	4.2395e-25	51.9648
TESC	0.709493	13.4791	6.56888	2.07537e-09	7.85597e-09	10.7885
NUCB1	0.709453	15.7261	8.5312	1.28952e-13	8.17251e-13	20.3428
FERMT3	0.709107	16.2753	10.5257	4.72384e-18	6.10443e-17	30.4662
ATP6V0B	0.70908	15.8278	11.7632	8.5305e-21	2.03999e-19	36.7361
RASGRP4	0.708963	15.9327	9.75275	2.49951e-16	2.37262e-15	26.5298
ARPC5	0.708772	16.9682	10.3725	1.03698e-17	1.25873e-16	29.6861
AQP1	0.708388	8.60541	4.79562	5.45535e-06	1.42259e-05	3.10673
KCNK5	0.708239	7.58129	5.66081	1.35409e-07	4.22327e-07	6.69703
MRPL33	0.707765	11.4458	12.4253	3.02124e-22	1.05103e-20	40.0528
KCNJ2	0.707378	14.5302	7.24551	7.9543e-11	3.53416e-10	13.9977
PINK1	0.706985	15.0627	10.1396	3.4284e-17	3.76204e-16	28.4999
KCNE5	0.706685	7.43043	8.63678	7.54212e-14	4.93631e-13	20.8736
HTRA1	0.70562	7.73773	4.47105	1.99806e-05	4.89648e-05	1.85568
RRAGD	0.705104	12.4844	10.1295	3.60918e-17	3.94014e-16	28.4489
AGTPBP1	0.704895	14.5338	7.82159	4.60279e-12	2.36393e-11	16.8089
TMEM144	0.704678	9.99258	8.65094	7.01798e-14	4.61845e-13	20.9449
ELOC	0.704466	11.4385	10.2529	1.91518e-17	2.21282e-16	29.0775
DHRS7B	0.704264	11.5582	12.8658	3.33917e-23	1.51948e-21	42.2396
SMIM5	0.703936	10.3238	5.18226	1.08815e-06	3.07337e-06	4.66832
ARPC2	0.703758	16.9745	13.6003	8.83772e-25	6.3801e-23	45.8451
COQ2	0.70363	10.9118	10.8024	1.1436e-18	1.65491e-17	31.8738
PSMD4	0.703399	14.7783	13.4732	1.65004e-24	1.1002e-22	45.2253
B3GALT4	0.703105	12.5492	12.242	7.59114e-22	2.31385e-20	39.138
ADGRE2	0.702889	15.4035	8.00023	1.88219e-12	1.01842e-11	17.6922
IFI35	0.702874	13.514	6.20955	1.11844e-08	3.89154e-08	9.13592
SMIM3	0.701497	11.6147	10.1989	2.52753e-17	2.85675e-16	28.8023
VSIG10L	0.701399	7.93667	9.08119	7.81726e-15	5.83424e-14	23.1179
LSMEM1	0.701127	11.3133	7.81691	4.71154e-12	2.41655e-11	16.7858
MED12L	0.700889	8.19178	6.66263	1.3295e-09	5.1514e-09	11.226
NUF2	0.700758	7.41666	4.50143	1.77343e-05	4.37447e-05	1.97034
PKM	0.700494	17.0203	9.56941	6.40606e-16	5.6533e-15	25.5968
PELO	0.700252	11.9854	10.4635	6.49852e-18	8.19377e-17	30.1498
NLRP12	0.700103	15.0866	7.94124	2.52991e-12	1.34501e-11	17.4
HBA1	0.700052	11.021	3.1784	0.00195295	0.00381783	-2.48426
TIMM10	0.699959	10.8863	5.29778	6.63625e-07	1.91691e-06	5.14881
VASP	0.699496	17.637	9.66067	4.01029e-16	3.64974e-15	26.0611
CISD2	0.699393	11.368	6.66008	1.34574e-09	5.21014e-09	11.2141
RHD	0.69934	8.63966	4.00979	0.000114882	0.00025963	0.181991
TRAPPC5	0.699147	11.0318	10.6857	2.07997e-18	2.85298e-17	31.2802
JOSD2	0.699118	11.9199	10.4528	6.86549e-18	8.61459e-17	30.0953
PPP2R3C	0.69898	13.1359	11.4931	3.36289e-20	6.94383e-19	35.3742
CCND3	0.698909	16.2713	11.0802	2.76122e-19	4.60675e-18	33.2842
SIRPB1	0.698865	15.426	7.8224	4.58417e-12	2.355e-11	16.8129
PLK1	0.6985	9.77197	7.22718	8.70086e-11	3.84894e-10	13.9093
ST3GAL2	0.698474	15.1699	10.1926	2.61023e-17	2.94329e-16	28.7703
ADIPOR1	0.697971	16.5335	6.96238	3.15423e-10	1.31647e-09	12.6409
TPT1	0.697733	17.4735	6.47202	3.27975e-09	1.21141e-08	10.3392
FKBP1A	0.697022	16.2485	11.3812	5.94562e-20	1.15444e-18	34.8085
GBP2	0.69696	16.3919	7.413	3.49451e-11	1.61816e-10	14.8085
RNF135	0.696736	13.1948	11.8445	5.65068e-21	1.40557e-19	37.145
RSL24D1	0.696436	11.8539	5.79351	7.47946e-08	2.3938e-07	7.27654
NDUFB9	0.696389	13.3934	10.804	1.1346e-18	1.64312e-17	31.8816
CAMKK1	0.696261	12.8377	9.14205	5.72588e-15	4.35634e-14	23.4263
GABARAP	0.696163	13.7299	9.94607	9.26132e-17	9.45482e-16	27.5143
SDCBP	0.69597	17.3344	9.06838	8.34666e-15	6.20763e-14	23.053
SERPING1	0.695747	11.9081	2.43369	0.0166581	0.028241	-4.43391
PPP1R3B	0.695563	15.0485	8.80185	3.25476e-14	2.24663e-13	21.7054
CMTM5	0.695281	10.7194	4.84622	4.43512e-06	1.17004e-05	3.30684
NABP1	0.694964	15.549	7.9378	2.57387e-12	1.36725e-11	17.383
KIF3C	0.694904	11.6104	6.70523	1.08509e-09	4.2429e-09	11.4257
LSM6	0.693898	11.7738	9.28252	2.78933e-15	2.2244e-14	24.1388
WSB2	0.693329	13.2846	11.1126	2.34032e-19	3.97357e-18	33.4484
ATP6V1E1	0.693243	14.2577	14.0537	9.658e-26	1.0025e-23	48.0425
LAT2	0.692866	16.0195	10.8699	8.09577e-19	1.21932e-17	32.2166
TMEM38A	0.692847	10.2161	7.70137	8.38031e-12	4.17342e-11	16.2173
CLEC12B	0.692549	10.2912	4.60837	1.16113e-05	2.92345e-05	2.37798
PSMB6	0.692388	12.7821	11.9758	2.90761e-21	7.69075e-20	37.8047
CAP1	0.69236	17.8699	10.986	4.47081e-19	7.09529e-18	32.8059
FURIN	0.691586	15.9505	10.2896	1.58664e-17	1.85555e-16	29.2642
CSF3R	0.691261	19.9842	8.94001	1.60839e-14	1.15418e-13	22.4033
METRNL	0.690798	13.5241	9.59054	5.74773e-16	5.117e-15	25.7042
HSPA4L	0.690695	5.12446	3.86453	0.000194374	0.000429081	-0.317813
CUTC	0.690598	11.6229	10.1624	3.0481e-17	3.3932e-16	28.6165
SPA17	0.690457	7.0681	9.59999	5.47584e-16	4.89765e-15	25.7523
MAOB	0.690229	5.84387	6.57899	1.97822e-09	7.50153e-09	10.8356
BLOC1S2	0.690034	12.3107	9.49055	9.60107e-16	8.23077e-15	25.1957
TIMP2	0.689847	15.694	9.43428	1.28132e-15	1.07212e-14	24.9097
GNAI3	0.689774	14.932	11.662	1.42556e-20	3.22059e-19	36.2263
YPEL4	0.689363	8.69931	4.41188	2.51688e-05	6.10632e-05	1.63394
RPL39	0.688796	13.3086	5.96893	3.38034e-08	1.11976e-07	8.05294
VAMP3	0.688235	14.3998	10.8225	1.03168e-18	1.50886e-17	31.976
ASAH1	0.688154	16.0497	9.77442	2.2363e-16	2.14396e-15	26.6401
IMPDH1	0.688052	16.2109	9.68561	3.52824e-16	3.24953e-15	26.188
TRMT9B	0.686914	6.01781	4.29801	3.90423e-05	9.27194e-05	1.21286
CC2D2B	0.686814	8.3669	7.28604	6.52189e-11	2.93508e-10	14.1933
SEPHS2	0.686637	14.0274	13.3883	2.50727e-24	1.57204e-22	44.81
TUBA1A	0.686518	16.4684	7.46886	2.65308e-11	1.24626e-10	15.0802
ATP5MD	0.686371	11.2159	9.7702	2.28527e-16	2.18764e-15	26.6186
ENTPD1	0.686268	14.3431	10.0925	4.36651e-17	4.68436e-16	28.26
AURKA	0.68625	8.77862	6.37852	5.08904e-09	1.84526e-08	9.90803
ATP5PD	0.686194	12.8647	13.2121	5.98502e-24	3.27437e-22	43.9462
FBN1	0.685577	7.32951	4.03083	0.000106349	0.000241311	0.255493
CLDN9	0.685556	11.6552	8.42914	2.16374e-13	1.33174e-12	19.8308
H3F3B	0.685443	17.7664	9.69634	3.3392e-16	3.09174e-15	26.2426
SPPL2A	0.685368	14.0146	11.3656	6.43911e-20	1.24057e-18	34.7294
MTHFS	0.685337	9.7731	7.95191	2.3983e-12	1.27858e-11	17.4528
STX10	0.685224	14.6457	11.5629	2.3582e-20	5.04843e-19	35.7266
ENO1	0.684729	16.8687	10.1286	3.62601e-17	3.95627e-16	28.4443
PLSCR2	0.684668	5.97034	7.35654	4.61391e-11	2.11005e-10	14.5345
UQCR10	0.684568	12.399	11.7225	1.04899e-20	2.44463e-19	36.5308
TMED8	0.684515	12.9962	8.28845	4.40906e-13	2.60034e-12	19.1268
ECE1	0.684328	15.8663	9.51564	8.44155e-16	7.32173e-15	25.3233
NDUFB6	0.68429	12.0371	12.1122	1.46045e-21	4.14255e-20	38.4883
CASP1	0.683942	15.3983	9.48072	1.00977e-15	8.62957e-15	25.1457
SNCA	0.683621	14.1212	3.56292	0.000556106	0.00116379	-1.31087
ORMDL2	0.683534	12.212	12.6216	1.12958e-22	4.43585e-21	41.0296
IL1B	0.683399	13.6017	5.91	4.41912e-08	1.44517e-07	7.79085
KLHDC8A	0.682522	7.38815	4.28931	4.03625e-05	9.5689e-05	1.18101
SLCO2B1	0.68239	5.03499	6.77749	7.68057e-10	3.05869e-09	11.7654
COPS9	0.682223	11.3102	9.76356	2.36449e-16	2.25785e-15	26.5848
GPSM3	0.681989	17.1842	9.69755	3.31854e-16	3.07409e-15	26.2488
SUMO1	0.68125	13.3795	14.2661	3.45122e-26	4.4479e-24	49.0638
BEGAIN	0.680667	9.21227	3.72195	0.000321719	0.000692441	-0.794925
RIPOR3	0.68055	8.36964	4.5168	1.66932e-05	4.13411e-05	2.02852
RPH3A	0.680349	10.999	3.04907	0.00291439	0.00556533	-2.85431
MICU1	0.680304	13.6592	10.0409	5.69133e-17	6.0182e-16	27.9972
CEACAM3	0.680085	15.0023	8.56898	1.06446e-13	6.81813e-13	20.5326
ARHGDIB	0.68005	18.3294	11.0619	3.0318e-19	5.00168e-18	33.1914
ST14	0.679982	12.5136	7.6054	1.34991e-11	6.5643e-11	15.7468
RAB24	0.679144	13.4017	9.97432	8.01053e-17	8.27913e-16	27.6582
DSE	0.67896	13.0603	9.7974	1.98739e-16	1.92165e-15	26.7571
PRC1	0.678759	9.32753	5.10361	1.51874e-06	4.22488e-06	4.34474
RGMA	0.678432	6.55266	6.33579	6.21536e-09	2.22966e-08	9.71191
B9D2	0.677892	11.9027	10.9676	4.91206e-19	7.77628e-18	32.7125
ROM1	0.677769	9.80441	8.09094	1.19328e-12	6.66896e-12	18.1426
SLC39A8	0.677604	11.7387	4.98434	2.5049e-06	6.78635e-06	3.8597
CXCR1	0.677113	17.6635	7.49037	2.38566e-11	1.1267e-10	15.1849
NT5C3A	0.676895	12.8353	9.72054	2.94897e-16	2.76395e-15	26.3658
KIF15	0.676498	7.7173	4.72938	7.14044e-06	1.84224e-05	2.84681
ZMAT5	0.676405	12.0195	13.6125	8.32686e-25	6.10308e-23	45.9042
SUB1	0.67598	13.1733	6.88503	4.58152e-10	1.87468e-09	12.2736
HIST2H2BF	0.675647	10.8575	6.53914	2.38906e-09	8.97968e-09	10.6503
HIST1H2BE	0.674941	9.48679	6.81842	6.31154e-10	2.53929e-09	11.9585
KLLN	0.674933	8.63372	7.5195	2.06578e-11	9.8508e-11	15.327
FAM49B	0.674814	15.8222	10.6474	2.53049e-18	3.43413e-17	31.0856
KCND1	0.674083	9.97427	8.90351	1.93778e-14	1.3787e-13	22.2188
TICRR	0.674053	6.55076	5.17173	1.13798e-06	3.20607e-06	4.62485
BUD31	0.674008	12.9916	14.5904	7.24053e-27	1.20335e-24	50.6134
NDUFA2	0.67373	12.5113	12.0743	1.76785e-21	4.87759e-20	38.2987
CDC123	0.673614	13.8939	10.3918	9.39014e-18	1.14999e-16	29.7846
CDC34	0.67352	14.5919	7.19169	1.03492e-10	4.54878e-10	13.7383
FBXO9	0.673308	14.12	9.75481	2.47323e-16	2.35138e-15	26.5403
KIF11	0.6733	9.28095	4.63787	1.03204e-05	2.61661e-05	2.49154
MTF1	0.673001	13.6832	10.8495	8.98572e-19	1.33348e-17	32.1131
FOXQ1	0.672645	4.67126	4.85315	4.31075e-06	1.13911e-05	3.33434
FAM20C	0.672596	11.0723	6.60159	1.77714e-09	6.78054e-09	10.9409
SNX32	0.672584	12.4769	8.00523	1.83553e-12	9.95134e-12	17.717
NHLH1	0.672464	7.64217	9.78832	2.08222e-16	2.00727e-15	26.7109
TMED1	0.672316	11.657	12.455	2.60266e-22	9.25534e-21	40.2008
TRAPPC1	0.671832	14.1634	10.5753	3.66319e-18	4.83134e-17	30.7185
ATP5F1C	0.671258	12.8666	8.52021	1.36356e-13	8.62462e-13	20.2876
ATP6V1D	0.671109	12.6247	11.81	6.72896e-21	1.64817e-19	36.9716
RFX2	0.67098	12.8763	7.55582	1.72591e-11	8.31686e-11	15.5043
OLFML2B	0.670808	7.6879	6.07348	2.09523e-08	7.07734e-08	8.52105
HOXA9	0.670192	6.9462	6.70544	1.084e-09	4.23954e-09	11.4267
GPX1	0.670136	16.089	6.41857	4.2174e-09	1.54378e-08	10.0924
UQCRB	0.669624	12.0885	8.09819	1.15059e-12	6.44161e-12	18.1786
TIMM17B	0.66958	12.7599	12.5261	1.82252e-22	6.8758e-21	40.5546
LST1	0.669564	15.9524	8.18693	7.35938e-13	4.21858e-12	18.6203
HIST1H2BJ	0.669254	9.84031	6.20314	1.15215e-08	3.9987e-08	9.10682
SPTLC2	0.669206	14.743	9.30641	2.46794e-15	1.98292e-14	24.2601
SEC61B	0.668987	13.0511	12.9597	2.09241e-23	1.00338e-21	42.7036
SLC4A1	0.668533	14.6202	3.21845	0.00172128	0.00338874	-2.3671
PI3	0.66816	13.7413	2.98738	0.0035133	0.0066273	-3.02631
TAF13	0.667928	10.6694	8.50228	1.49336e-13	9.3869e-13	20.1976
KMT5A	0.667873	12.4025	13.246	5.06171e-24	2.88427e-22	44.1126
SCCPDH	0.667727	11.0452	11.3816	5.93239e-20	1.15303e-18	34.8107
JMJD6	0.667259	12.975	10.333	1.26972e-17	1.5103e-16	29.4852
TRIB1	0.667011	13.0693	7.20116	9.88094e-11	4.35292e-10	13.7839
TSHZ3	0.666836	11.7378	6.28432	7.90201e-09	2.79658e-08	9.47646
IFT20	0.666604	11.4972	9.11659	6.52253e-15	4.9215e-14	23.2972
TMEM255B	0.666578	8.74483	8.26185	5.043e-13	2.95697e-12	18.994
DTL	0.666533	7.74331	4.47303	1.98255e-05	4.86156e-05	1.86317
CCNB1	0.666501	9.22387	4.68926	8.39634e-06	2.14923e-05	2.69047
RIOK3	0.666465	14.3127	8.15005	8.86207e-13	5.02149e-12	18.4366
CD300LF	0.6662	14.4216	8.02574	1.65593e-12	9.04148e-12	17.8188
COX17	0.666031	10.7297	10.4041	8.81679e-18	1.0881e-16	29.8471
ANXA8L1	0.665953	5.18855	7.04621	2.10144e-10	8.94567e-10	13.0407
ZFP36	0.665665	16.2254	9.68723	3.49905e-16	3.22729e-15	26.1963
BAZ1A	0.665427	14.9865	8.3327	3.52533e-13	2.11091e-12	19.348
NAPRT	0.665206	13.9514	8.22185	6.17111e-13	3.5737e-12	18.7944
ST20	0.665022	12.2973	8.05414	1.43577e-12	7.9136e-12	17.9597
STMP1	0.664815	13.1953	9.03648	9.82498e-15	7.22315e-14	22.8915
IRF7	0.664543	14.4191	6.22803	1.02658e-08	3.57971e-08	9.21991
CTF1	0.664083	6.47319	7.19234	1.03162e-10	4.5364e-10	13.7415
CLEC2B	0.663881	12.2821	6.95633	3.24776e-10	1.35315e-09	12.6122
GASK1B	0.663491	13.1675	6.96122	3.17197e-10	1.32272e-09	12.6354
COMMD6	0.663482	10.5675	5.62509	1.58688e-07	4.91339e-07	6.54226
ART4	0.663303	4.39413	3.24617	0.00157623	0.00311756	-2.2853
TRPV4	0.662939	7.60597	7.0221	2.3622e-10	9.99366e-10	12.9255
ZC3H3	0.662526	13.4999	7.65188	1.07183e-11	5.27617e-11	15.9744
PPM1N	0.662429	10.2584	5.3737	4.78029e-07	1.40275e-06	5.46789
PBK	0.662366	5.67859	3.88367	0.000181491	0.000402027	-0.252737
ESPL1	0.662321	8.27667	4.80273	5.29936e-06	1.38454e-05	3.13476
IL17RA	0.662161	16.9274	9.45538	1.14989e-15	9.6933e-15	25.0169
TBXAS1	0.662099	15.6179	9.16861	4.99822e-15	3.83157e-14	23.5609
GNB2	0.662079	16.8627	9.5276	7.93912e-16	6.91405e-15	25.3841
TMLHE	0.661526	10.7147	10.6251	2.83654e-18	3.81444e-17	30.9723
GSN	0.660835	15.5856	7.24769	7.86997e-11	3.49831e-10	14.0082
EVI2B	0.660768	16.8521	10.19	2.64632e-17	2.97874e-16	28.7567
GSR	0.660725	14.0022	10.0518	5.38165e-17	5.7096e-16	28.0526
FHL2	0.659622	7.90679	4.94406	2.96172e-06	7.96443e-06	3.69748
ALDOA	0.659564	17.6129	9.19991	4.25839e-15	3.30132e-14	23.7196
CARD19	0.659497	13.4572	10.8658	8.26792e-19	1.24232e-17	32.1957
LPCAT3	0.658156	13.3683	9.20609	4.12568e-15	3.20361e-14	23.751
RAB1A	0.657258	14.2849	12.0224	2.29816e-21	6.18957e-20	38.0382
SELENOK	0.657248	12.2587	8.00264	1.85958e-12	1.00732e-11	17.7042
ARPC1A	0.65716	11.3935	10.66	2.37296e-18	3.22948e-17	31.1494
MRVI1	0.657063	14.2231	5.96146	3.49734e-08	1.15732e-07	8.01965
TMEM60	0.655772	11.1088	13.5452	1.1584e-24	8.17819e-23	45.5765
CFL1	0.65553	17.8884	9.02592	1.03702e-14	7.59203e-14	22.838
GFOD2	0.65534	12.9303	9.58453	5.92773e-16	5.26018e-15	25.6737
COX7A2L	0.655295	12.9113	10.4845	5.8361e-18	7.44161e-17	30.2564
LILRB2	0.655249	16.1008	9.70583	3.18041e-16	2.96042e-15	26.2909
LINGO3	0.655148	11.6301	8.24322	5.54028e-13	3.23374e-12	18.901
MRPS18C	0.654968	10.8618	10.023	6.2377e-17	6.55625e-16	27.9062
SLCO4C1	0.65495	12.2164	6.19275	1.20893e-08	4.18968e-08	9.05969
MARCKS	0.654341	15.7093	6.77206	7.88305e-10	3.13737e-09	11.7398
MT2A	0.654114	12.5195	5.18645	1.06889e-06	3.02207e-06	4.68566
PGAM1	0.653577	15.2207	10.885	7.49449e-19	1.13499e-17	32.2932
SOCS1	0.653189	10.7516	5.33471	5.65901e-07	1.64527e-06	5.30372
UBE2S	0.652997	11.9526	9.1658	5.07064e-15	3.88399e-14	23.5467
PIGBOS1	0.652832	10.3534	10.3097	1.431e-17	1.68793e-16	29.3666
NUDT16	0.652215	13.7106	9.52246	8.15117e-16	7.07626e-15	25.358
EMC3	0.651989	13.6078	8.99691	1.20276e-14	8.76197e-14	22.6911
SUPT4H1	0.651739	14.3244	12.9595	2.09466e-23	1.00338e-21	42.7026
MXI1	0.651393	13.6523	5.25955	7.82091e-07	2.2419e-06	4.98915
MRPL28	0.650958	13.1071	11.5548	2.4573e-20	5.23143e-19	35.6857
SUMF1	0.650702	12.5177	9.07252	8.172e-15	6.08244e-14	23.0739
PDLIM7	0.650172	15.2174	8.12727	9.93933e-13	5.60844e-12	18.3232
PARP9	0.650133	15.0688	7.02857	2.28924e-10	9.69999e-10	12.9564
TMEM169	0.649559	9.75842	7.12073	1.46279e-10	6.34658e-10	13.3975
PGLYRP2	0.649453	7.22069	4.75173	6.52226e-06	1.6891e-05	2.93422
RPL34	0.649189	12.5042	4.55946	1.41033e-05	3.52224e-05	2.19075
RLN3	0.648767	5.23019	6.23649	9.87023e-09	3.45036e-08	9.25843
SIRPD	0.648476	9.35681	8.65547	6.85836e-14	4.5227e-13	20.9676
FAM177A1	0.648439	12.2698	9.93299	9.90491e-17	1.0069e-15	27.4476
SH3BGRL3	0.647653	17.0195	8.87206	2.27518e-14	1.59979e-13	22.0599
PIK3AP1	0.647371	15.3737	7.37929	4.12544e-11	1.89478e-10	14.6448
CYB5R4	0.647203	14.4633	9.61257	5.13328e-16	4.61491e-15	25.8163
NCF2	0.646678	17.9527	9.93769	9.66845e-17	9.83386e-16	27.4716
ARG2	0.646129	8.93326	6.98491	2.82849e-10	1.18697e-09	12.7482
EMID1	0.645976	8.32719	4.348	3.22248e-05	7.7313e-05	1.39681
RNF7	0.645703	12.2619	10.908	6.662e-19	1.01855e-17	32.4101
DUSP3	0.644784	13.2149	9.1757	4.82012e-15	3.70243e-14	23.5968
NSG2	0.644233	6.0418	6.92854	3.71441e-10	1.53591e-09	12.48
SLC39A1	0.64389	13.9052	12.2666	6.70705e-22	2.074e-20	39.261
ANKDD1A	0.643875	10.5662	6.5401	2.37831e-09	8.94277e-09	10.6547
POLR2J	0.64377	12.7386	12.5363	1.73118e-22	6.54406e-21	40.6057
TAF10	0.643671	14.0341	12.6503	9.78359e-23	3.94694e-21	41.1723
GMPR2	0.643448	14.0792	13.1195	9.46792e-24	4.90061e-22	43.4909
DNAH10	0.643442	7.99519	3.84253	0.000210261	0.000462344	-0.392323
UQCRHL	0.643322	8.76674	10.3886	9.54686e-18	1.16473e-16	29.7681
ARHGEF17	0.642866	8.75384	3.92527	0.000156243	0.000348471	-0.110486
CD300H	0.642573	11.2034	3.45602	0.000796199	0.00163192	-1.64778
CTSC	0.642369	15.2482	8.18357	7.48509e-13	4.28424e-12	18.6035
TKT	0.641907	17.7542	8.95613	1.48126e-14	1.06614e-13	22.4849
COL7A1	0.641727	8.8527	6.75146	8.69986e-10	3.44106e-09	11.6429
CLEC4G	0.641402	8.06978	6.19403	1.20177e-08	4.16704e-08	9.0655
MT1E	0.640118	7.79116	5.38408	4.56981e-07	1.34489e-06	5.51171
DHFR	0.639468	11.7134	7.16423	1.18333e-10	5.18091e-10	13.6063
UGP2	0.639278	14.1174	12.1225	1.386e-21	3.97245e-20	38.5403
SH3D19	0.639179	9.8507	4.52074	1.64357e-05	4.07559e-05	2.04348
MIEN1	0.638952	12.758	13.367	2.78448e-24	1.7138e-22	44.7059
SEC62	0.638852	14.1089	7.84327	4.13033e-12	2.13441e-11	16.9159
TMEM256	0.638724	8.83544	6.84255	5.62076e-10	2.27376e-09	12.0725
ADORA2B	0.638678	8.08783	8.15517	8.63657e-13	4.90095e-12	18.4621
NFKBIL1	0.638606	11.3919	11.56	2.39318e-20	5.10626e-19	35.7119
POU5F1	0.638458	7.98741	5.21886	9.30908e-07	2.64598e-06	4.8199
HDAC4	0.637955	14.0852	11.5452	2.58074e-20	5.44592e-19	35.637
HIST1H2AC	0.637784	15.0942	7.04885	2.0747e-10	8.83577e-10	13.0533
LHFPL6	0.637735	6.03865	4.24679	4.74572e-05	0.000111449	1.02597
HSDL2	0.637667	13.698	7.85737	3.84944e-12	1.99786e-11	16.9854
TNIP1	0.637531	16.3476	9.95448	8.86966e-17	9.09365e-16	27.5571
SAMD14	0.63724	9.57611	4.21522	5.34848e-05	0.000124993	0.911575
ASGR1	0.63716	11.3187	6.81977	6.27076e-10	2.52447e-09	11.9648
TMEM33	0.636525	14.0738	10.3074	1.4483e-17	1.7052e-16	29.3547
CD36	0.636445	14.6413	7.45014	2.90986e-11	1.36047e-10	14.989
LMO2	0.636317	14.0268	10.7895	1.22168e-18	1.75993e-17	31.8082
EMC7	0.63602	12.6873	13.7	5.42197e-25	4.23244e-23	46.3301
SLC31A2	0.635607	14.2093	7.66246	1.0169e-11	5.01863e-11	16.0263
SLC49A3	0.635071	11.5592	8.38278	2.73633e-13	1.66442e-12	19.5986
ATF6	0.634839	14.2771	9.78344	2.13507e-16	2.05306e-15	26.686
MFF	0.634792	12.9349	11.2341	1.25882e-19	2.27266e-18	34.0639
PPP4R2	0.634296	13.6586	7.11436	1.50892e-10	6.52903e-10	13.3669
RNF146	0.63395	13.375	8.61687	8.34556e-14	5.42702e-13	20.7734
JAK2	0.633101	13.7677	8.41601	2.31259e-13	1.41926e-12	19.765
DYRK3	0.633093	7.34257	4.30243	3.83869e-05	9.12871e-05	1.22908
DRC7	0.63308	7.16405	6.31467	6.85944e-09	2.4479e-08	9.6152
LHFPL2	0.632677	11.4998	6.08412	1.99528e-08	6.75517e-08	8.56891
RBM38	0.632562	15.6297	5.95606	3.58443e-08	1.18431e-07	7.99559
RTN4	0.632559	15.6303	12.1658	1.11424e-21	3.24193e-20	38.757
ZBTB7B	0.632283	16.2595	11.3297	7.73055e-20	1.45622e-18	34.5479
GLTP	0.631535	13.7545	11.18	1.65914e-19	2.89641e-18	33.7898
AP1S1	0.63144	11.4966	12.3577	4.24156e-22	1.40675e-20	39.7159
FADD	0.631413	13.5997	10.5196	4.87335e-18	6.28495e-17	30.4353
MRPL47	0.631359	10.057	7.10103	1.61004e-10	6.9462e-10	13.303
SERTAD3	0.631329	12.5007	11.0999	2.49748e-19	4.21434e-18	33.3839
UBXN2B	0.631157	14.4655	8.57558	1.02935e-13	6.61088e-13	20.5658
STAC3	0.630907	11.4917	8.69209	5.69247e-14	3.8035e-13	21.152
RPS3A	0.630851	15.2822	4.69736	8.12661e-06	2.08379e-05	2.72197
ZNHIT1	0.630734	13.4536	15.2381	3.32229e-28	1.01267e-25	53.6704
SYCP2	0.630551	10.0138	5.75765	8.78636e-08	2.7916e-07	7.11925
COQ5	0.630381	11.5704	13.5593	1.08076e-24	7.6866e-23	45.6454
PHF21A	0.630308	15.2341	9.87295	1.34826e-16	1.33388e-15	27.1418
PLOD2	0.629788	6.61863	5.42732	3.7862e-07	1.12566e-06	5.69481
C15orf65	0.629711	5.81823	7.31489	5.66143e-11	2.56407e-10	14.3328
KYNU	0.62969	11.6901	6.65279	1.39322e-09	5.38962e-09	11.18
ATP5ME	0.629672	10.7666	11.0714	2.88826e-19	4.79346e-18	33.2396
C9orf66	0.629514	9.29779	9.02896	1.02104e-14	7.48643e-14	22.8533
SDHB	0.629308	13.2804	13.435	1.99167e-24	1.29648e-22	45.0385
RNF13	0.629154	14.7533	9.04349	9.47949e-15	6.98521e-14	22.9269
OSBP2	0.628986	12.3901	3.55036	0.000580286	0.00121122	-1.35089
HSD17B13	0.628441	8.39143	8.21604	6.35461e-13	3.67775e-12	18.7654
AZI2	0.627875	12.7209	8.01106	1.78261e-12	9.68356e-12	17.7459
CPD	0.627471	15.0992	6.91643	3.93794e-10	1.62485e-09	12.4225
ACTR10	0.6271	12.8886	10.8483	9.04192e-19	1.34079e-17	32.1069
STIMATE-MUSTN1	0.626619	9.08669	6.07748	2.05712e-08	6.95719e-08	8.53902
STAB1	0.625408	14.2511	6.74216	9.09568e-10	3.58875e-09	11.5991
TAF12	0.625251	12.4906	14.6548	5.31725e-27	9.63276e-25	50.9197
NPL	0.624902	14.9131	8.67026	6.36122e-14	4.21222e-13	21.0421
CNEP1R1	0.624133	12.9558	9.47536	1.03792e-15	8.8349e-15	25.1185
HMBS	0.623515	11.1935	4.7453	6.6944e-06	1.73298e-05	2.90907
MRPL51	0.623455	12.2061	10.3301	1.28861e-17	1.53126e-16	29.4706
PRAM1	0.623445	15.1992	7.80392	5.02719e-12	2.57021e-11	16.7218
SLC44A3	0.623432	6.05469	6.77245	7.86836e-10	3.13218e-09	11.7417
CLEC4A	0.623401	10.2407	7.06668	1.90267e-10	8.12836e-10	13.1385
HNRNPH2	0.623079	14.3898	10.7802	1.2813e-18	1.83618e-17	31.761
SRI	0.623058	13.0224	11.3561	6.75746e-20	1.29375e-18	34.6815
RHBDF2	0.622274	14.5018	8.07555	1.2893e-12	7.16389e-12	18.0661
ENY2	0.621764	12.08	8.67249	6.2894e-14	4.16754e-13	21.0533
CFLAR	0.620537	17.559	11.6236	1.73294e-20	3.82225e-19	36.0324
NAT1	0.619894	9.7811	7.29677	6.18786e-11	2.79261e-10	14.2451
C2orf76	0.619731	8.7156	7.51096	2.15487e-11	1.02502e-10	15.2853
PYCR1	0.619542	7.564	4.42373	2.40351e-05	5.8431e-05	1.67819
DZIP1L	0.619457	7.08122	3.4744	0.000748943	0.00154032	-1.59043
TSTA3	0.619154	13.2691	5.49905	2.76691e-07	8.33983e-07	6.00026
C2	0.618801	8.1909	4.30908	3.74214e-05	8.90683e-05	1.25349
TWF2	0.618071	14.7189	9.95331	8.92327e-17	9.13886e-16	27.5511
FAM129A	0.617833	16.9364	6.8561	5.26604e-10	2.13521e-09	12.1366
BLVRA	0.617818	12.3902	9.35701	1.90419e-15	1.55535e-14	24.5171
LRMDA	0.617756	9.50816	7.53253	1.93677e-11	9.26784e-11	15.3906
CHST13	0.61772	11.1553	4.19324	5.81103e-05	0.000135309	0.83226
RFXANK	0.617618	12.9993	10.927	6.0443e-19	9.38308e-18	32.5066
ERI1	0.617608	11.7239	7.78901	5.41564e-12	2.75926e-11	16.6483
RHOU	0.617441	12.0143	6.17063	1.33922e-08	4.61458e-08	8.9594
NEDD4L	0.617424	10.2537	5.51779	2.54839e-07	7.70777e-07	6.08043
SNRPG	0.617284	10.5752	6.10961	1.77461e-08	6.04216e-08	8.68367
BTBD10	0.61675	12.48	9.89331	1.21438e-16	1.21205e-15	27.2455
THOC7	0.616633	11.8123	11.7943	7.28837e-21	1.77387e-19	36.8923
PSMA7	0.616301	14.448	13.1896	6.68808e-24	3.6366e-22	43.836
ARHGEF37	0.616163	7.41842	4.19613	5.7481e-05	0.000133957	0.842671
C9orf72	0.615805	13.8776	7.86233	3.75505e-12	1.95257e-11	17.0099
PRELID1	0.615727	15.0831	10.8426	9.311e-19	1.37538e-17	32.0778
RHBDD2	0.61565	13.5611	8.89879	1.98504e-14	1.40972e-13	22.195
RAD54L	0.615571	7.15051	4.48609	1.88359e-05	4.63131e-05	1.9124
PSMC1	0.615419	13.7321	13.8673	2.39367e-25	2.15523e-23	47.1417
BAD	0.614949	11.826	10.9148	6.43524e-19	9.90986e-18	32.4444
DPM1	0.614874	11.7077	8.36876	2.93752e-13	1.77891e-12	19.5284
PXK	0.614807	13.6511	10.2102	2.38518e-17	2.70382e-16	28.8598
MAP1LC3B	0.614805	14.885	9.0623	8.61036e-15	6.39137e-14	23.0222
PSMD6	0.614735	13.4726	13.6535	6.80821e-25	5.22952e-23	46.1041
IFI16	0.614398	15.8166	7.89772	3.14589e-12	1.65599e-11	17.1848
MPC2	0.614349	12.3448	10.7403	1.57241e-18	2.21859e-17	31.5578
SEMA3B	0.614201	8.30764	6.36402	5.44661e-09	1.96785e-08	9.84142
CMTM6	0.614014	16.3669	8.77978	3.64213e-14	2.49162e-13	21.5941
PLXNC1	0.614014	16.3985	7.46176	2.74774e-11	1.28915e-10	15.0456
BNIP2	0.61398	14.6788	8.03373	1.59083e-12	8.71329e-12	17.8584
R3HDM4	0.613923	17.3328	7.86681	3.67202e-12	1.91153e-11	17.032
CNGB1	0.613902	4.68692	8.71532	5.05753e-14	3.40293e-13	21.2691
SLC1A2	0.613406	4.67123	5.63642	1.50912e-07	4.68624e-07	6.59127
AK4	0.612156	7.77454	6.49924	2.88472e-09	1.07162e-08	10.4652
RAB10	0.612141	15.0405	10.4836	5.86154e-18	7.46909e-17	30.2521
SHISA5	0.611996	16.5333	7.35485	4.65242e-11	2.12715e-10	14.5263
HSPA1B	0.611924	12.1998	7.11031	1.53893e-10	6.6499e-10	13.3475
OXER1	0.611503	12.3849	5.58286	1.91316e-07	5.86315e-07	6.3599
VBP1	0.610836	11.9845	7.69479	8.65935e-12	4.30345e-11	16.1849
G6PD	0.610705	15.4979	7.48213	2.48482e-11	1.17066e-10	15.1448
TMEM234	0.610299	11.5631	11.8642	5.11455e-21	1.27884e-19	37.244
GNG11	0.610233	11.0011	4.64109	1.01882e-05	2.58446e-05	2.50397
TRIM22	0.61021	15.898	5.29529	6.70773e-07	1.93581e-06	5.13839
NFAM1	0.610124	17.7508	8.31996	3.7599e-13	2.23949e-12	19.2843
SLC22A31	0.609797	6.42626	4.68453	8.55771e-06	2.18907e-05	2.67211
SLC25A20	0.609582	12.7028	11.7601	8.66693e-21	2.06542e-19	36.7203
SLC25A44	0.609493	14.5795	9.91169	1.10501e-16	1.11038e-15	27.3391
SELPLG	0.609351	17.3842	8.67873	6.09272e-14	4.04839e-13	21.0848
JTB	0.609076	14.696	12.371	3.96864e-22	1.33001e-20	39.7819
BORCS8	0.609075	13.0014	10.2174	2.29835e-17	2.62086e-16	28.8966
CHMP4B	0.608303	15.1694	10.0545	5.3062e-17	5.63266e-16	28.0666
PRKAG1	0.607705	12.9983	15.3383	2.07131e-28	6.85784e-26	54.139
LRRC6	0.607692	10.4067	4.6614	9.39172e-06	2.39095e-05	2.58243
TNFRSF1A	0.607464	16.7425	9.2646	3.05742e-15	2.41811e-14	24.0479
WDR13	0.607461	13.3702	12.718	6.97686e-23	2.94459e-21	41.508
PSMC6	0.607392	12.6352	7.05035	2.05967e-10	8.77369e-10	13.0605
SCN8A	0.607253	7.41304	3.4873	0.000717384	0.00147937	-1.55005
RMI2	0.607162	8.76679	4.11105	7.90491e-05	0.000181772	0.538336
GABRR2	0.60715	8.10199	5.21894	9.30601e-07	2.6455e-06	4.82022
SLC25A40	0.607095	12.6997	6.08564	1.98144e-08	6.71067e-08	8.57572
UBE2B	0.606408	14.4879	9.00485	1.1549e-14	8.42295e-14	22.7313
SCNM1	0.606102	13.0576	14.0028	1.237e-25	1.21816e-23	47.7969
JCHAIN	0.606089	13.4582	2.38255	0.0190174	0.0318896	-4.55113
RUNDC3A	0.604683	11.9491	3.18552	0.00190974	0.00373678	-2.46351
NRDC	0.604547	15.4643	12.3047	5.53607e-22	1.75718e-20	39.4515
LGALSL	0.604542	11.838	6.74516	8.96626e-10	3.54205e-09	11.6132
FGGY	0.604428	9.3886	7.60487	1.35347e-11	6.57827e-11	15.7442
RAC2	0.604114	17.474	9.15173	5.44925e-15	4.15906e-14	23.4753
SKAP2	0.604099	15.0904	6.40853	4.421e-09	1.61492e-08	10.0461
MSR1	0.603422	9.55131	3.86644	0.000193055	0.000426461	-0.311349
DOK1	0.603073	13.9202	13.2444	5.10103e-24	2.88953e-22	44.1049
TBC1D2	0.602672	13.0614	9.4616	1.11382e-15	9.41817e-15	25.0485
BRK1	0.602443	14.1511	12.4824	2.26888e-22	8.28313e-21	40.3371
CYBB	0.602391	16.738	7.71583	7.79841e-12	3.90898e-11	16.2883
DDIT3	0.601963	11.2393	8.22988	5.92608e-13	3.44218e-12	18.8344
NDST2	0.601638	9.25186	6.82552	6.09992e-10	2.45879e-09	11.992
RHOT1	0.601499	13.1818	10.2696	1.75811e-17	2.04118e-16	29.1624
FRMD4B	0.601438	11.4479	6.28954	7.71221e-09	2.73394e-08	9.5003
SCAND1	0.601293	13.0443	9.73916	2.68015e-16	2.53158e-15	26.4606
CTSH	0.601134	14.6352	8.24576	5.4697e-13	3.19545e-12	18.9137
RPL31	0.60107	13.3478	4.29138	4.00432e-05	9.49907e-05	1.18862
AC005840.1	0.60079	14.2726	9.53368	7.69535e-16	6.717e-15	25.415
RPL27	0.600712	14.5589	6.03789	2.46679e-08	8.27998e-08	8.36124
UBALD2	0.600562	15.7415	9.27578	2.88731e-15	2.29491e-14	24.1046
ZNF230	0.600445	11.5001	8.21349	6.43698e-13	3.72205e-12	18.7527
PLAUR	0.60028	14.3531	8.04567	1.49821e-12	8.23347e-12	17.9177
FIS1	0.600231	13.4939	7.11485	1.50526e-10	6.51612e-10	13.3693
OS9	0.600102	16.2046	10.7903	1.21697e-18	1.75446e-17	31.8121
SH2D4B	0.599862	6.22797	7.02128	2.37159e-10	1.00312e-09	12.9216
PCYT1A	0.599467	14.7181	8.33205	3.53697e-13	2.11722e-12	19.3448
TMEM167A	0.599378	14.1214	9.00008	1.18339e-14	8.62418e-14	22.7072
LCP1	0.598883	19.3132	9.76392	2.36022e-16	2.25489e-15	26.5866
RPS9	0.598831	16.8781	10.8327	9.79261e-19	1.43767e-17	32.0277
RIPK3	0.598796	12.6497	10.9709	4.82945e-19	7.65181e-18	32.7293
LMAN2	0.598469	15.0611	13.0269	1.49862e-23	7.45546e-22	43.035
RIT1	0.598294	13.752	9.39659	1.55453e-15	1.28394e-14	24.7181
ACSS2	0.59802	13.0615	9.45462	1.15438e-15	9.72017e-15	25.013
FEM1C	0.597784	12.9421	7.64703	1.09793e-11	5.39635e-11	15.9507
PGM1	0.597621	12.9614	7.87249	3.56907e-12	1.86241e-11	17.0601
PTMS	0.597386	12.7571	6.34624	5.9189e-09	2.12728e-08	9.75984
GDF9	0.596971	8.259	6.33368	6.27691e-09	2.25006e-08	9.70224
CEBPZOS	0.596533	12.7733	7.13372	1.37312e-10	5.97372e-10	13.4598
GHRL	0.596409	11.1106	5.58979	1.85539e-07	5.69974e-07	6.38979
HIST1H3G	0.596071	5.42994	5.60142	1.76232e-07	5.42599e-07	6.43998
MND1	0.595949	4.97968	6.25848	8.91185e-09	3.13088e-08	9.35855
SNX21	0.595582	10.5671	8.40402	2.45732e-13	1.50089e-12	19.705
TCIRG1	0.595566	16.8627	11.2674	1.06179e-19	1.94557e-18	34.2329
HIST1H3H	0.595365	11.0645	5.10203	1.52892e-06	4.25197e-06	4.33826
STYXL1	0.595167	12.0047	9.75173	2.51258e-16	2.38385e-15	26.5246
PCTP	0.594758	12.755	9.8869	1.25506e-16	1.24742e-15	27.2129
STX11	0.594723	14.3456	7.40813	3.5794e-11	1.65507e-10	14.7848
CPEB4	0.594434	13.6544	6.99629	2.6769e-10	1.1268e-09	12.8024
SOX6	0.594179	7.30699	4.50273	1.76441e-05	4.35501e-05	1.97524
SELENOF	0.593933	14.5699	9.28562	2.74529e-15	2.1911e-14	24.1546
UBB	0.592753	17.3635	4.07047	9.18895e-05	0.000209866	0.394762
HIST1H4E	0.592749	7.25662	5.25265	8.056e-07	2.30619e-06	4.96037
MLLT1	0.592596	14.6064	7.08476	1.74261e-10	7.48623e-10	13.2251
VCX	0.592592	4.25586	6.20537	1.14032e-08	3.96266e-08	9.11693
SPATA1	0.592575	9.1062	9.72053	2.94919e-16	2.76395e-15	26.3658
MAPK3	0.592275	14.6034	7.89522	3.18556e-12	1.67595e-11	17.1724
BCL2L1	0.591924	15.4308	4.37055	2.95405e-05	7.11394e-05	1.48023
KCNH3	0.591901	11.2595	3.78914	0.000254111	0.000553697	-0.571789
TFDP1	0.591888	13.4198	7.81648	4.72176e-12	2.42115e-11	16.7837
PAM	0.591845	12.6099	6.18088	1.27723e-08	4.41523e-08	9.00584
MMP19	0.591845	7.52358	6.61535	1.66479e-09	6.37084e-09	11.0051
FAS	0.591484	13.4627	7.11016	1.54007e-10	6.6533e-10	13.3468
SGTB	0.591339	13.0261	7.09148	1.6866e-10	7.26183e-10	13.2572
ADGRG2	0.591245	4.76831	5.72662	1.00961e-07	3.18928e-07	6.98356
PARL	0.591109	9.89943	8.08298	1.24206e-12	6.91944e-12	18.103
YWHAH	0.591107	14.0585	9.07394	8.1127e-15	6.04064e-14	23.0811
RNASEK	0.590665	11.1072	11.7974	7.17191e-21	1.74996e-19	36.9083
PLSCR4	0.590145	5.38687	6.36497	5.42245e-09	1.95986e-08	9.84578
PTEN	0.589871	16.1674	6.89922	4.27864e-10	1.75735e-09	12.3409
CYTH4	0.589757	17.0205	9.04579	9.36839e-15	6.91396e-14	22.9386
CRABP2	0.589742	8.33833	6.32668	6.48546e-09	2.32005e-08	9.67019
JAG1	0.589517	9.61426	8.60233	8.98553e-14	5.81757e-13	20.7003
CHCHD2	0.589309	14.3419	9.93137	9.98759e-17	1.0137e-15	27.4394
CDC42	0.588934	16.6471	12.0872	1.65614e-21	4.60911e-20	38.3635
ANXA5	0.588782	15.2661	8.34761	3.26943e-13	1.9675e-12	19.4225
RAB17	0.588628	4.38096	6.37299	5.22244e-09	1.89077e-08	9.88265
MGST2	0.588579	11.1126	8.60951	8.66363e-14	5.62243e-13	20.7364
SYN1	0.588564	6.39432	5.81156	6.89615e-08	2.2182e-07	7.35587
CRADD	0.588225	10.3696	10.2908	1.57717e-17	1.84561e-16	29.2701
MED18	0.588059	12.5431	10.2784	1.68066e-17	1.95944e-16	29.2071
MMRN1	0.587937	9.09908	3.74416	0.000297675	0.00064307	-0.721501
TPM1	0.58747	11.8089	7.83997	4.19911e-12	2.16762e-11	16.8996
THOC5	0.587367	13.8647	10.0256	6.15486e-17	6.47271e-16	27.9195
CBSL	0.587233	5.8161	4.71782	7.48222e-06	1.92654e-05	2.80168
CCDC126	0.587186	11.1949	6.63721	1.50049e-09	5.77547e-09	11.1072
AP2S1	0.587105	13.5861	9.7876	2.08998e-16	2.01374e-15	26.7072
TDP2	0.586743	14.0529	10.5928	3.34886e-18	4.44731e-17	30.8076
BSG	0.58642	16.4634	7.32447	5.40133e-11	2.45321e-10	14.3791
FAM214B	0.586283	14.3337	9.86903	1.37564e-16	1.35817e-15	27.1219
GTF2F2	0.586088	11.0017	8.90705	1.90312e-14	1.35505e-13	22.2367
MFSD14B	0.585838	14.2647	7.83206	4.36832e-12	2.24892e-11	16.8605
DNAAF1	0.585716	7.03353	4.04108	0.000102416	0.0002328	0.291389
SDCBP2	0.585439	8.29963	7.24373	8.02407e-11	3.56351e-10	13.989
VOPP1	0.585186	14.4924	8.62098	8.17303e-14	5.32565e-13	20.7941
APH1B	0.584988	12.8791	8.88315	2.14999e-14	1.51621e-13	22.1159
GUK1	0.584934	16.0691	4.90237	3.51968e-06	9.38337e-06	3.53043
GSKIP	0.584686	11.6122	6.51802	2.63995e-09	9.8686e-09	10.5522
ERO1A	0.584495	14.4688	9.39374	1.57739e-15	1.30114e-14	24.7036
LRFN1	0.584275	12.8295	7.01487	2.4464e-10	1.03294e-09	12.8911
UBE2H	0.583895	14.5337	6.4411	3.79362e-09	1.39317e-08	10.1963
NBEAL2	0.5838	17.09	10.2225	2.23982e-17	2.56171e-16	28.9221
DYTN	0.58377	6.0792	4.50992	1.71519e-05	4.24115e-05	2.00245
RTF2	0.583643	14.94	10.6873	2.06255e-18	2.83516e-17	31.2885
TRIP6	0.583567	10.93	10.5102	5.11372e-18	6.58169e-17	30.3875
TXNDC9	0.583557	11.1018	6.84708	5.49965e-10	2.22665e-09	12.0939
MPDU1	0.583503	12.5841	12.0399	2.10315e-21	5.68028e-20	38.1262
DAD1	0.582862	13.5441	12.2554	7.09515e-22	2.18346e-20	39.2051
NBN	0.582655	13.7832	6.86652	5.0085e-10	2.03681e-09	12.1859
NMNAT1	0.5826	12.0998	12.4684	2.43342e-22	8.73439e-21	40.2676
ALOX15B	0.582373	7.95812	3.41542	0.000910712	0.00185219	-1.77361
TMUB2	0.5822	14.0584	13.6438	7.14173e-25	5.44217e-23	46.0566
VCAN	0.581882	15.8765	6.28634	7.82803e-09	2.77142e-08	9.48568
FKBP1B	0.581551	7.4598	5.46486	3.21398e-07	9.63593e-07	5.85436
PLOD1	0.581468	13.5571	7.74541	6.73025e-12	3.3975e-11	16.4337
KCTD21	0.581412	12.2366	11.0877	2.65783e-19	4.45749e-18	33.3221
BEND7	0.580637	9.30609	4.38501	2.79331e-05	6.74376e-05	1.53391
CLEC18B	0.580583	8.54101	5.11482	1.4485e-06	4.03826e-06	4.39068
KANK2	0.580427	9.00094	3.93212	0.00015242	0.000340102	-0.0869465
FAR1	0.580333	14.4843	6.9468	3.40079e-10	1.41354e-09	12.5668
PPA2	0.580087	11.9036	7.80423	5.01941e-12	2.56692e-11	16.7233
DNAJA1	0.579911	14.34	8.46968	1.7619e-13	1.0985e-12	20.034
TOR1A	0.579261	13.3582	13.0753	1.17834e-23	6.00204e-22	43.2737
SLC8A1	0.578617	12.7812	6.49445	2.95071e-09	1.09535e-08	10.4429
GDE1	0.578367	13.8986	11.3726	6.21336e-20	1.20277e-18	34.7648
H1F0	0.578336	12.7171	4.92538	3.20021e-06	8.57454e-06	3.62251
TOMM40L	0.577993	11.4405	10.1595	3.09413e-17	3.44045e-16	28.6016
ITGAX	0.577894	17.3781	8.17004	8.01332e-13	4.57159e-12	18.5361
DNAJC4	0.577886	13.148	8.91605	1.81767e-14	1.29709e-13	22.2822
TREML2	0.577835	14.6179	7.2537	7.64192e-11	3.40561e-10	14.0371
PDK3	0.577568	12.1994	9.426	1.33694e-15	1.11623e-14	24.8675
2021-03-02	0.577432	6.9542	6.2766	8.19138e-09	2.891e-08	9.4412
LRP10	0.577405	17.4084	8.22574	6.05129e-13	3.5096e-12	18.8138
FAM166A	0.577141	7.30257	8.48208	1.65455e-13	1.03527e-12	20.0962
SLC25A28	0.57703	13.0369	8.08485	1.23038e-12	6.86033e-12	18.1123
FBN2	0.577025	9.94011	5.45277	3.38837e-07	1.01303e-06	5.8029
DEPDC1B	0.576715	7.07572	3.85962	0.000197819	0.000436383	-0.334475
APBB1IP	0.57642	16.4066	6.78302	7.47977e-10	2.98491e-09	11.7915
KNL1	0.576233	8.59844	4.25671	4.57011e-05	0.000107654	1.06206
CINP	0.575934	12.297	12.6704	8.85024e-23	3.62369e-21	41.2718
TLR4	0.575662	15.3788	6.17733	1.29835e-08	4.48339e-08	8.98977
CPQ	0.575144	13.9166	7.71337	7.8948e-12	3.95626e-11	16.2762
ETHE1	0.5744	11.854	10.0296	6.02933e-17	6.34766e-16	27.9399
RNF175	0.574369	8.4584	6.28254	7.96792e-09	2.81886e-08	9.46832
PSMB7	0.574184	13.002	12.9623	2.06514e-23	9.98915e-22	42.7166
SELP	0.574067	10.6506	5.76192	8.61967e-08	2.74e-07	7.13795
OST4	0.573949	13.8839	8.4098	2.38644e-13	1.45992e-12	19.7339
LILRA2	0.573712	15.8429	8.0885	1.20804e-12	6.74357e-12	18.1304
DPY30	0.573674	10.7889	8.38346	2.72702e-13	1.65928e-12	19.602
FAM210B	0.573287	14.5442	3.9002	0.000171024	0.000379762	-0.196346
TRPS1	0.573259	11.5994	6.73247	9.52729e-10	3.7498e-09	11.5536
AMN1	0.573202	11.4052	6.45264	3.59311e-09	1.32232e-08	10.2496
NOXRED1	0.573066	8.34033	8.29699	4.22286e-13	2.49666e-12	19.1695
EFHD2	0.573005	17.7785	9.39097	1.59997e-15	1.31807e-14	24.6896
SORCS2	0.572771	7.57035	5.0041	2.30664e-06	6.28111e-06	3.93959
MYLK3	0.57272	6.68354	5.95242	3.64425e-08	1.20262e-07	7.9794
AMPD3	0.572699	13.77	7.46564	2.69556e-11	1.26559e-10	15.0645
BAMBI	0.57269	6.63404	5.84041	6.05499e-08	1.9578e-07	7.48298
TADA3	0.572572	14.683	11.4123	5.07477e-20	1.00258e-18	34.9657
TPI1	0.572468	15.6042	10.4974	5.46231e-18	6.9789e-17	30.3221
C11orf71	0.572319	10.3992	10.3415	1.21536e-17	1.4533e-16	29.5286
HCFC1R1	0.572194	11.5924	8.139	9.36923e-13	5.30104e-12	18.3816
SMOX	0.57213	11.9097	4.63399	1.04819e-05	2.65616e-05	2.47657
RBPJ	0.571934	14.8384	7.76752	6.02805e-12	3.05507e-11	16.5425
CTSZ	0.571724	16.3243	10.102	4.15746e-17	4.48012e-16	28.3086
FAM114A1	0.571108	9.2898	8.44619	1.98465e-13	1.229e-12	19.9163
RPS7	0.570958	13.747	4.4857	1.88647e-05	4.63781e-05	1.91092
F8A1	0.570555	12.1333	7.48773	2.417e-11	1.14066e-10	15.1721
TPD52L2	0.570548	15.4865	11.1272	2.17213e-19	3.71099e-18	33.5224
SLC35A1	0.570459	10.6762	6.7574	8.45612e-10	3.34948e-09	11.6708
NSUN3	0.57017	11.4431	10.1618	3.05794e-17	3.40218e-16	28.6133
VMP1	0.569878	16.6201	8.73984	4.46387e-14	3.02149e-13	21.3927
NCF1	0.56969	17.1899	7.07483	1.8288e-10	7.82846e-10	13.1775
ARF4	0.569671	13.7333	13.068	1.22188e-23	6.19042e-22	43.2377
FAM72B	0.569583	6.96826	7.4148	3.46362e-11	1.60424e-10	14.8172
UFD1	0.56885	13.3833	17.8879	1.90639e-33	6.1014e-30	65.6269
AQP10	0.568447	9.35195	3.98514	0.000125715	0.000283413	0.0962203
UBA3	0.568446	13.6785	8.65412	6.90561e-14	4.5523e-13	20.9608
MT1X	0.567924	9.41965	6.17308	1.32415e-08	4.56509e-08	8.97049
AURKAIP1	0.567606	13.9123	11.1768	1.68608e-19	2.93463e-18	33.7738
CAB39	0.567351	15.4746	7.51279	2.13545e-11	1.01653e-10	15.2942
KIAA0825	0.567248	9.94752	6.35177	5.76788e-09	2.07689e-08	9.7852
FNDC3B	0.567182	13.8223	6.99434	2.70226e-10	1.13623e-09	12.7931
THBS3	0.566978	12.3751	10.7809	1.27666e-18	1.83089e-17	31.7646
CORO2A	0.566567	11.834	7.07785	1.8021e-10	7.72103e-10	13.192
SEC11A	0.56633	13.556	12.7536	5.83973e-23	2.51436e-21	41.6846
SNORC	0.56615	8.17275	8.88704	2.10775e-14	1.4886e-13	22.1356
NEU1	0.565953	13.1029	11.1391	2.04413e-19	3.50331e-18	33.5827
RPS19BP1	0.565881	12.7447	11.436	4.49717e-20	9.06183e-19	35.0857
CLTB	0.565735	13.4646	11.747	9.26137e-21	2.19563e-19	36.6545
ESCO2	0.565677	6.88861	4.0831	8.76927e-05	0.00020083	0.43934
DHCR7	0.56559	10.545	4.93074	3.1299e-06	8.39669e-06	3.64402
GTF2B	0.565345	12.1548	10.7834	1.26053e-18	1.81183e-17	31.7772
PIM1	0.565282	15.8122	8.44281	2.019e-13	1.24665e-12	19.8993
SLC7A5	0.565168	11.9785	5.98203	3.18428e-08	1.05707e-07	8.1114
DPM3	0.564728	11.1113	9.03034	1.01382e-14	7.44207e-14	22.8604
KRT7	0.56472	5.95029	4.29924	3.88588e-05	9.23179e-05	1.21738
SLC22A15	0.564626	12.1564	8.08669	1.2191e-12	6.8014e-12	18.1214
LNPK	0.564425	12.1457	5.90614	4.49722e-08	1.46996e-07	7.77373
RAB18	0.56431	13.3961	7.82517	4.52127e-12	2.32517e-11	16.8266
ILK	0.564114	14.7996	11.3273	7.82497e-20	1.47028e-18	34.5359
UBC	0.563963	17.7369	9.14016	5.78156e-15	4.39001e-14	23.4167
PTRHD1	0.563455	10.604	7.22113	8.96217e-11	3.9618e-10	13.8801
PLEKHO2	0.563105	15.8043	8.36869	2.93864e-13	1.77899e-12	19.528
MT1G	0.563053	4.91883	6.60419	1.75532e-09	6.69995e-09	10.953
ANKRD55	0.562884	10.6753	4.7733	5.97487e-06	1.55237e-05	3.01887
C18orf21	0.562807	10.6128	10.466	6.41646e-18	8.10094e-17	30.1624
GBE1	0.562758	12.0997	7.80988	4.87983e-12	2.49886e-11	16.7512
CYB5R3	0.562675	14.2951	9.01583	1.09192e-14	7.97871e-14	22.7869
ACTB	0.562566	20.8883	7.29245	6.32014e-11	2.84829e-10	14.2243
DNAJC3	0.562111	14.3065	9.63904	4.48126e-16	4.0534e-15	25.951
EMC6	0.561438	11.0336	10.9958	4.25158e-19	6.76413e-18	32.8558
ARMT1	0.561382	12.1041	6.86395	5.07081e-10	2.06084e-09	12.1738
PPP4C	0.561142	15.0255	10.403	8.86718e-18	1.09362e-16	29.8414
LYZ	0.561067	19.5423	5.93778	3.89529e-08	1.28216e-07	7.91424
CIDEB	0.560945	13.7082	8.30899	3.97431e-13	2.35843e-12	19.2295
RPL23	0.560645	13.9512	4.72158	7.36942e-06	1.89851e-05	2.81634
LYL1	0.560458	14.7704	6.54101	2.36811e-09	8.90965e-09	10.6589
BCAP31	0.560281	14.99	7.69208	8.77687e-12	4.35735e-11	16.1716
HMGN5	0.560113	7.15906	5.89269	4.77996e-08	1.55813e-07	7.71411
UROD	0.560065	12.4946	9.13662	5.88721e-15	4.46493e-14	23.3987
MMP27	0.559819	4.1173	5.03856	1.99682e-06	5.47686e-06	4.07936
TSPAN16	0.559668	7.77415	7.2837	6.5974e-11	2.96627e-10	14.182
FAM209A	0.5594	9.27934	8.29851	4.19052e-13	2.47831e-12	19.1771
RAB7A	0.559254	16.169	9.5211	8.20824e-16	7.12258e-15	25.351
GMNN	0.559057	9.19029	5.98483	3.14397e-08	1.04435e-07	8.12386
EFCAB12	0.558927	9.81754	5.83195	6.29059e-08	2.0309e-07	7.44568
DYNLRB1	0.558426	13.3678	10.5543	4.07821e-18	5.32024e-17	30.612
ATP5PB	0.558422	14.024	10.3461	1.18697e-17	1.42281e-16	29.5521
P4HA1	0.55839	12.2707	6.82076	6.2411e-10	2.51306e-09	11.9695
NFKBIZ	0.558054	14.077	8.223	6.13534e-13	3.55405e-12	18.8001
CHEK1	0.557775	8.0856	4.27587	4.2486e-05	0.000100413	1.1319
MCTS1	0.557441	11.5575	10.9292	5.97837e-19	9.3033e-18	32.5175
TLR1	0.557395	14.9165	7.49373	2.3464e-11	1.1098e-10	15.2013
TSPAN2	0.557375	13.145	5.19097	1.0485e-06	2.96618e-06	4.70436
PSMB4	0.557296	14.5024	12.1318	1.32278e-21	3.80829e-20	38.5866
CFP	0.557234	16.0905	7.56556	1.64465e-11	7.94122e-11	15.5519
ACPP	0.557225	12.0838	6.56319	2.13207e-09	8.06423e-09	10.762
ERP44	0.556442	14.0705	13.0026	1.69071e-23	8.30352e-22	42.9153
NDUFA6	0.556275	11.345	8.58273	9.92639e-14	6.39009e-13	20.6017
TAF7	0.556241	14.3757	8.84699	2.58551e-14	1.80151e-13	21.9333
TBCB	0.556193	13.6828	11.5784	2.17941e-20	4.70768e-19	35.8048
FIG4	0.556024	12.6426	7.08364	1.75214e-10	7.5238e-10	13.2197
CABP7	0.555658	7.78978	7.42628	3.27317e-11	1.52006e-10	14.873
GPR17	0.555499	5.569	5.62296	1.60197e-07	4.95467e-07	6.53303
LRRC25	0.555351	16.1521	7.1917	1.03486e-10	4.54878e-10	13.7384
MPST	0.555084	12.6768	12.3421	4.58913e-22	1.49838e-20	39.6377
JKAMP	0.554675	12.6425	9.58749	5.83854e-16	5.18582e-15	25.6887
MVP	0.55463	16.3695	9.23228	3.60797e-15	2.83243e-14	23.8838
LSM10	0.554472	12.8504	11.7786	7.89023e-21	1.90347e-19	36.8135
ZBTB8OS	0.554353	11.1429	11.2551	1.13092e-19	2.05848e-18	34.1703
SLC36A4	0.554168	11.5981	6.50144	2.85498e-09	1.06146e-08	10.4753
PFN1	0.554086	18.0594	8.27681	4.676e-13	2.75102e-12	19.0687
CHP1	0.554083	14.3483	9.14346	5.68494e-15	4.32863e-14	23.4334
RPL9	0.55405	14.3715	4.182	6.0622e-05	0.000140986	0.791813
TSG101	0.553919	13.4645	12.109	1.48392e-21	4.19673e-20	38.4725
RBMS1	0.553883	14.7518	7.70525	8.22014e-12	4.1011e-11	16.2363
XKR3	0.553796	7.14774	3.12692	0.00229344	0.00444006	-2.63308
ADAP1	0.553485	13.1588	10.2503	1.94143e-17	2.24046e-16	29.064
VAT1	0.553413	13.103	6.72508	9.86964e-10	3.87501e-09	11.5189
TUBA1C	0.552813	12.8843	10.7021	1.91193e-18	2.64489e-17	31.3638
MED11	0.552569	11.7851	10.7226	1.72124e-18	2.39861e-17	31.468
MMP1	0.552356	5.18808	3.38525	0.00100566	0.00203709	-1.86636
POLR2K	0.552276	9.90326	4.59773	1.21142e-05	3.04091e-05	2.33713
REPS2	0.552087	13.3996	6.34071	6.0739e-09	2.18095e-08	9.73449
SUCLG1	0.551824	13.096	12.5023	2.05267e-22	7.59488e-21	40.4365
COX14	0.551477	10.6773	10.6553	2.42988e-18	3.30461e-17	31.1259
SLC22A18	0.551186	12.6953	5.79856	7.3116e-08	2.3432e-07	7.29872
ITGB2	0.551085	18.4747	7.56314	1.66448e-11	8.03295e-11	15.5401
FRAT1	0.551035	15.0057	7.75087	6.54974e-12	3.30899e-11	16.4606
BCKDK	0.550515	13.3621	8.45023	1.94441e-13	1.20681e-12	19.9365
MYO7B	0.550284	11.5133	4.95927	2.78036e-06	7.49456e-06	3.75866
ALDH4A1	0.550128	9.57492	7.16688	1.16815e-10	5.11564e-10	13.619
CLIC2	0.54996	9.39374	4.66181	9.37598e-06	2.38726e-05	2.58405
CLCN1	0.549447	7.14528	3.91232	0.000163718	0.000364339	-0.154884
POLQ	0.549337	7.17065	3.88501	0.000180619	0.000400281	-0.248167
AC020613.1	0.549246	5.70784	6.81299	6.47814e-10	2.60196e-09	11.9328
ARRDC4	0.548985	12.0644	4.97524	2.60169e-06	7.0337e-06	3.82298
NOS1AP	0.54882	5.45417	5.6243	1.59249e-07	4.92823e-07	6.53881
ANKS1A	0.548466	12.8134	6.87532	4.80078e-10	1.95897e-09	12.2276
GRK6	0.548425	16.1748	10.1337	3.53241e-17	3.86292e-16	28.4702
VAV1	0.548191	15.6823	10.0411	5.68576e-17	6.01563e-16	27.9981
B3GNT2	0.548032	12.336	6.6307	1.54764e-09	5.94623e-09	11.0768
MAGIX	0.547939	8.09342	8.5514	1.16384e-13	7.41022e-13	20.4443
MRPL22	0.547889	10.0176	6.73577	9.37795e-10	3.69253e-09	11.5691
YBX3	0.54776	16.1917	3.70493	0.000341382	0.000732957	-0.850972
HPRT1	0.547714	11.4241	7.9333	2.63256e-12	1.39726e-11	17.3607
AKIRIN2	0.547646	14.1984	10.0274	6.09964e-17	6.41816e-16	27.9284
KIAA1958	0.547579	10.2083	6.17924	1.28696e-08	4.44494e-08	8.9984
RELT	0.547557	14.6293	11.2184	1.3636e-19	2.4381e-18	33.9846
HCLS1	0.547387	17.7799	7.66754	9.91571e-12	4.89867e-11	16.0512
TM6SF1	0.547066	12.8431	7.65522	1.05416e-11	5.19317e-11	15.9908
SRGAP1	0.547	6.48902	4.88321	3.8092e-06	1.01159e-05	3.45396
ARF5	0.546827	14.5546	10.2139	2.34051e-17	2.6626e-16	28.8785
CDC26	0.546675	11.3898	10.1518	3.22013e-17	3.57022e-16	28.562
NDUFB1	0.546547	11.9733	11.4011	5.3738e-20	1.05299e-18	34.9089
TRIM21	0.546114	14.4256	7.40926	3.55946e-11	1.64625e-10	14.7903
TMSB4X	0.546041	19.558	10.5612	3.93725e-18	5.15737e-17	30.6469
HSD17B11	0.545946	15.3203	9.3918	1.59319e-15	1.31361e-14	24.6938
DNAJC5	0.545788	15.6013	10.0748	4.78082e-17	5.10317e-16	28.1701
GTF2A2	0.545677	12.3244	9.6906	3.43909e-16	3.17657e-15	26.2134
NR1I3	0.545639	6.31015	8.08376	1.23715e-12	6.89606e-12	18.1069
GNAQ	0.54547	14.6143	6.15547	1.43634e-08	4.92978e-08	8.89081
MCU	0.545247	12.0931	8.43508	2.09965e-13	1.29437e-12	19.8606
GTF2H2	0.545082	10.1109	3.85746	0.000199353	0.000439414	-0.341802
2021-03-05	0.545059	12.6778	11.4625	3.93041e-20	8.02933e-19	35.2194
COPE	0.544963	14.5065	10.1483	3.27782e-17	3.62372e-16	28.5444
MCOLN1	0.544476	12.7726	7.70883	8.07491e-12	4.03494e-11	16.2539
C1D	0.544397	12.1391	8.0634	1.37049e-12	7.57992e-12	18.0057
ABTB1	0.543977	17.2966	7.44452	2.99157e-11	1.3974e-10	14.9617
TMEM258	0.543582	11.9204	10.1534	3.19313e-17	3.54438e-16	28.5704
SSC4D	0.543336	6.60868	6.83544	5.81592e-10	2.34878e-09	12.0389
DCTN6	0.543219	9.52213	8.07215	1.31153e-12	7.27269e-12	18.0492
LSM3	0.543048	10.474	6.62736	1.57242e-09	6.03781e-09	11.0611
TAX1BP1	0.542973	14.1441	7.16814	1.16096e-10	5.08528e-10	13.6251
PFDN4	0.542505	7.69788	4.16344	6.49977e-05	0.000150706	0.725215
IFNAR1	0.542339	15.1953	7.97741	2.11039e-12	1.1339e-11	17.5792
FAM160B1	0.542229	13.357	7.3364	5.09386e-11	2.32235e-10	14.4369
ENO3	0.542226	15.0567	7.49633	2.31645e-11	1.09645e-10	15.214
AC118754.1	0.542061	9.62571	5.09939	1.54603e-06	4.29706e-06	4.32747
MAK	0.542048	11.558	4.83202	4.701e-06	1.23628e-05	3.25055
CWF19L1	0.541803	13.3903	9.91899	1.06435e-16	1.07459e-15	27.3763
FAM53C	0.541642	15.246	7.87643	3.49954e-12	1.82762e-11	17.0795
TK2	0.541312	12.8732	8.90306	1.94226e-14	1.38115e-13	22.2166
SH2B2	0.541289	13.0865	6.57362	2.02927e-09	7.68904e-09	10.8106
COP1	0.540998	14.1702	10.6679	2.27846e-18	3.10969e-17	31.1897
SERTAD1	0.54077	11.8715	9.11069	6.7227e-15	5.06259e-14	23.2673
AAMDC	0.540735	8.71768	7.32773	5.3156e-11	2.41656e-10	14.3949
STBD1	0.540639	7.4567	4.67131	9.02514e-06	2.3022e-05	2.62082
JAML	0.540545	17.7717	8.1027	1.12473e-12	6.30418e-12	18.201
OSGIN1	0.540307	9.85012	5.62778	1.56811e-07	4.85919e-07	6.55387
EHD1	0.540087	16.487	7.91793	2.8433e-12	1.5033e-11	17.2847
DPH3	0.540069	12.2014	8.19453	7.0828e-13	4.07829e-12	18.6582
TRIM9	0.540051	8.63851	3.66695	0.000389455	0.000829586	-0.975339
DCTN2	0.539465	14.0657	11.0954	2.55489e-19	4.29987e-18	33.3613
NSMCE2	0.539103	10.2264	6.71397	1.04075e-09	4.07451e-09	11.4667
TNFAIP8L2	0.539045	13.9523	9.93288	9.91058e-17	1.00695e-15	27.4471
TRIP4	0.538455	12.3574	13.231	5.45015e-24	3.06919e-22	44.0392
PLK3	0.538199	12.7714	7.10547	1.57559e-10	6.80062e-10	13.3243
NDUFS6	0.538115	12.2007	9.20369	4.17669e-15	3.2406e-14	23.7388
PPT1	0.538002	16.1514	7.53896	1.87619e-11	8.99587e-11	15.4219
PRDX4	0.53727	10.7303	6.26449	8.66624e-09	3.04794e-08	9.38595
PF4	0.537187	13.2257	3.66315	0.000394606	0.000839997	-0.987733
C17orf53	0.537151	7.10277	4.57386	1.33206e-05	3.33458e-05	2.24571
INAVA	0.53675	5.60214	4.42712	2.37198e-05	5.76937e-05	1.69087
ADAMTSL4	0.536564	13.2758	6.93281	3.6386e-10	1.50619e-09	12.5003
USP15	0.536496	15.775	7.30545	5.92984e-11	2.68057e-10	14.2871
MBD2	0.536329	14.2854	11.586	2.09733e-20	4.54571e-19	35.8429
TUBB4B	0.535765	13.9792	10.5567	4.02852e-18	5.26615e-17	30.6242
ADAM17	0.535666	13.4157	9.70817	3.14237e-16	2.92784e-15	26.3029
MXD1	0.535179	17.483	8.06735	1.34359e-12	7.43541e-12	18.0253
ADCY4	0.534982	10.9377	8.27052	4.82691e-13	2.83372e-12	19.0373
SH3BGRL	0.534933	15.0314	7.04003	2.16546e-10	9.1958e-10	13.0112
UQCRFS1	0.534577	12.9452	10.4501	6.96138e-18	8.72581e-17	30.0815
CENPU	0.534351	8.49913	4.45856	2.09813e-05	5.13058e-05	1.80872
RAB11A	0.534193	14.0548	11.0713	2.8906e-19	4.79346e-18	33.2388
GPRC5C	0.533524	7.39264	5.18527	1.07431e-06	3.03649e-06	4.68075
PLD1	0.533423	10.8147	6.93841	3.54148e-10	1.46789e-09	12.5269
SRXN1	0.533376	10.575	5.72116	1.03458e-07	3.26545e-07	6.95972
HIST1H2BC	0.533253	11.7566	5.71886	1.04525e-07	3.29804e-07	6.9497
TMEM8A	0.533018	14.8691	8.82588	2.87939e-14	1.99741e-13	21.8267
FAM126B	0.532336	14.4696	6.10469	1.81519e-08	6.17377e-08	8.66153
TPM3	0.532146	17.1131	10.059	5.18526e-17	5.51042e-16	28.0895
AC027237.1	0.531933	8.33129	4.85289	4.31534e-06	1.14001e-05	3.33331
TMCO1	0.531899	12.5827	6.58974	1.8799e-09	7.14706e-09	10.8857
FAU	0.531879	15.1781	8.60281	8.96373e-14	5.80541e-13	20.7027
GCNT1	0.531864	11.3539	8.27809	4.646e-13	2.73504e-12	19.0751
GPANK1	0.531709	12.4263	13.2145	5.91306e-24	3.24497e-22	43.9583
STEAP4	0.531512	16.154	6.66863	1.29203e-09	5.01229e-09	11.2541
PIP4P2	0.53133	13.3264	7.71724	7.74402e-12	3.88475e-11	16.2952
LITAF	0.531254	18.1187	6.50219	2.84487e-09	1.0579e-08	10.4788
FAM89B	0.531248	11.1526	9.18104	4.69028e-15	3.61136e-14	23.6239
ORAI2	0.531175	15.6836	7.09154	1.68608e-10	7.26123e-10	13.2575
PSMD9	0.531145	10.7026	12.4813	2.28073e-22	8.30146e-21	40.3319
ANP32A	0.530933	15.8523	10.189	2.65951e-17	2.99183e-16	28.7518
SIRPB2	0.530875	14.9307	7.59066	1.45228e-11	7.04423e-11	15.6746
RPS15A	0.530729	12.9115	5.05706	1.84768e-06	5.08469e-06	4.15461
CHCHD5	0.530351	10.9616	11.1251	2.19549e-19	3.74422e-18	33.5118
LRRC37A3	0.53034	9.42893	7.88164	3.40956e-12	1.78403e-11	17.1053
INHBB	0.530229	8.35023	3.79886	0.00024553	0.000536152	-0.539261
GPR108	0.530217	14.1393	9.20835	4.07826e-15	3.17064e-14	23.7624
ERGIC2	0.530099	12.0723	6.24005	9.7084e-09	3.39644e-08	9.27464
SPOCD1	0.529795	9.35613	3.66514	0.000391899	0.000834698	-0.98124
UQCR11	0.52968	11.039	9.56625	6.511e-16	5.73802e-15	25.5806
KCNK13	0.529637	8.51637	5.70414	1.11632e-07	3.51421e-07	6.88548
PNPLA6	0.529498	15.0099	6.63511	1.51549e-09	5.82855e-09	11.0974
TPK1	0.529419	11.5176	4.82077	4.92265e-06	1.29086e-05	3.20602
CNN2	0.529282	17.4453	7.4186	3.39938e-11	1.57601e-10	14.8357
MRPS36	0.529228	10.6833	10.2104	2.38221e-17	2.70262e-16	28.861
RNF141	0.528765	14.1069	5.8549	5.67148e-08	1.83658e-07	7.54693
YWHAE	0.528129	14.8142	11.9103	4.04948e-21	1.0396e-19	37.4758
SIGLEC12	0.527769	7.14071	2.19415	0.03046	0.0489476	-4.96361
EPB42	0.527607	12.1705	2.66872	0.00884018	0.0157329	-3.86694
NSFL1C	0.527506	14.4493	9.67896	3.65091e-16	3.34647e-15	26.1541
OR6N1	0.527401	5.71082	2.01472	0.0465266	0.0719828	-5.32758
RENBP	0.527204	13.0711	8.1113	1.07714e-12	6.05512e-12	18.2438
DYNLL1	0.52715	13.3846	8.3472	3.27605e-13	1.97025e-12	19.4205
SYF2	0.527139	13.6492	12.9083	2.70211e-23	1.26867e-21	42.4497
TLN2	0.52705	7.0936	4.30745	3.76565e-05	8.96056e-05	1.24749
CALM2	0.527049	15.9634	9.7675	2.31712e-16	2.21592e-15	26.6049
ATP6AP1	0.526961	14.878	8.44484	1.99833e-13	1.23628e-12	19.9095
LAMTOR3	0.526826	12.3501	7.56254	1.66943e-11	8.05278e-11	15.5371
TRABD	0.52674	14.8761	10.343	1.20632e-17	1.4442e-16	29.536
ANAPC11	0.526733	12.3768	10.814	1.07803e-18	1.57067e-17	31.9324
RAD23B	0.526616	14.7692	9.68102	3.61249e-16	3.31917e-15	26.1646
DENND2C	0.526553	8.10715	3.41048	0.000925671	0.00188142	-1.78886
LYPLA1	0.52647	13.2301	7.55473	1.73528e-11	8.3557e-11	15.499
NRM	0.525135	11.8058	9.26399	3.0671e-15	2.42476e-14	24.0447
TGFBR1	0.524972	14.1848	6.08929	1.94845e-08	6.6071e-08	8.59216
LRRC4	0.524845	13.746	6.96827	3.06567e-10	1.28202e-09	12.6689
ACTR3	0.524609	16.5344	9.4884	9.7078e-16	8.31856e-15	25.1847
FBXW2	0.524326	14.3172	6.91084	4.04564e-10	1.66678e-09	12.396
FAM174B	0.524233	9.24177	7.62257	1.23972e-11	6.05449e-11	15.8308
OSBPL9	0.524054	13.4681	7.59357	1.43153e-11	6.94887e-11	15.6888
DSCC1	0.523937	6.75621	4.20759	5.50504e-05	0.000128511	0.883982
FPGT	0.523762	10.973	6.1661	1.36756e-08	4.70633e-08	8.93888
RPS6KA1	0.523103	16.3542	8.47992	1.67271e-13	1.04594e-12	20.0854
SPACA6	0.522962	9.93387	5.38719	4.50846e-07	1.32806e-06	5.52486
RAD51	0.522852	7.93486	3.85776	0.000199137	0.00043909	-0.340777
DPCD	0.52258	9.28539	4.89436	3.63801e-06	9.68405e-06	3.49844
CUEDC2	0.522503	12.7692	9.15993	5.22533e-15	3.99928e-14	23.5169
TXNL1	0.52238	12.9068	13.6339	7.49431e-25	5.68827e-23	46.0088
MYO7A	0.522373	9.42493	4.61944	1.11095e-05	2.80483e-05	2.42054
CPNE2	0.52214	12.8668	7.01552	2.4387e-10	1.02992e-09	12.8942
RAB4B	0.522033	12.2879	10.5793	3.58893e-18	4.74317e-17	30.7389
DTNBP1	0.522006	11.8741	8.72825	4.7354e-14	3.19852e-13	21.3342
RRAGA	0.522001	13.1843	11.8707	4.94907e-21	1.24231e-19	37.2766
CTRC	0.521731	7.53078	4.97086	2.64957e-06	7.16111e-06	3.80532
TECPR2	0.521434	14.6905	6.27112	8.40269e-09	2.96176e-08	9.41623
TMOD1	0.521425	11.3205	3.04146	0.00298274	0.00568794	-2.87567
MFSD1	0.521238	14.3154	8.75736	4.08295e-14	2.77736e-13	21.481
UBXN6	0.521188	15.9447	4.69853	8.08838e-06	2.07464e-05	2.72652
SSR2	0.521177	14.8867	11.4573	4.0355e-20	8.20038e-19	35.1932
ABHD5	0.520724	13.6649	6.76902	7.99871e-10	3.18143e-09	11.7255
SNRNP35	0.520224	12.334	11.207	1.44512e-19	2.57159e-18	33.9269
RGS3	0.520204	14.1635	7.92748	2.7105e-12	1.43664e-11	17.3319
ENSA	0.5202	14.7069	11.5618	2.37231e-20	5.07298e-19	35.7206
RAB1B	0.520106	15.8997	8.31089	3.93645e-13	2.33812e-12	19.2389
HLA-C	0.520057	20.3724	6.62253	1.60893e-09	6.17063e-09	11.0386
CILP2	0.519881	4.99928	3.40319	0.000948149	0.00192466	-1.8113
GSDMD	0.519342	14.8798	7.45601	2.82676e-11	1.32428e-10	15.0176
UBE2R2	0.519091	15.36	7.3695	4.32892e-11	1.98444e-10	14.5973
RARA	0.518941	15.9195	7.21679	9.1545e-11	4.04217e-10	13.8592
AATK	0.518231	14.9092	5.76566	8.47604e-08	2.69613e-07	7.15436
CHMP2B	0.517951	12.9485	7.9704	2.18596e-12	1.17123e-11	17.5444
CLEC11A	0.517298	10.0388	4.61227	1.14322e-05	2.88176e-05	2.39295
ABHD12B	0.517108	6.1124	7.08789	1.71632e-10	7.3815e-10	13.24
STARD3NL	0.517004	12.0169	7.12959	1.40106e-10	6.08976e-10	13.4399
PIN4	0.516947	9.4203	7.32182	5.47202e-11	2.48414e-10	14.3663
SLC16A6	0.516738	12.3908	8.19339	7.12342e-13	4.09677e-12	18.6525
ALDH2	0.516676	13.6946	5.80771	7.0167e-08	2.25358e-07	7.33894
COQ8B	0.516532	12.9976	9.74857	2.55371e-16	2.4181e-15	26.5085
CSGALNACT1	0.516338	12.9316	4.53175	1.57374e-05	3.91204e-05	2.08524
C5AR1	0.516293	17.0356	6.76634	8.10203e-10	3.21919e-09	11.7129
PAQR9	0.516094	5.0827	3.16983	0.00200614	0.00391543	-2.50916
DRAP1	0.515991	14.3778	7.88067	3.42613e-12	1.79172e-11	17.1005
LXN	0.515849	9.76376	6.88979	4.47755e-10	1.83331e-09	12.2962
SDHC	0.515831	14.0081	8.82201	2.93677e-14	2.03591e-13	21.8072
SPRY3	0.515776	10.1333	6.75263	8.65132e-10	3.42397e-09	11.6484
HBA2	0.515719	14.9527	2.26765	0.0254273	0.0415135	-4.80634
SPTSSA	0.515571	11.729	6.35219	5.75655e-09	2.07359e-08	9.78712
PSMB1	0.515312	13.6295	12.1834	1.0199e-21	3.00846e-20	38.8448
RGS2	0.515266	16.656	4.98769	2.47011e-06	6.70153e-06	3.87325
HLX	0.515087	13.5672	6.46931	3.32195e-09	1.22629e-08	10.3266
DLD	0.514835	12.682	9.98911	7.42439e-17	7.72322e-16	27.7335
FAM72A	0.514413	7.1092	8.39464	2.57696e-13	1.57196e-12	19.6579
POLR2L	0.514328	12.4354	8.7372	4.52447e-14	3.06035e-13	21.3793
NFU1	0.513965	10.3802	8.67888	6.08823e-14	4.04681e-13	21.0855
CENPE	0.513587	8.00072	3.45	0.000812274	0.00166238	-1.66651
RAC1	0.513458	15.4438	9.29956	2.5561e-15	2.05033e-14	24.2253
RAB2A	0.513187	14.0534	10.4677	6.36058e-18	8.03567e-17	30.171
ANXA8	0.512821	5.03816	4.79637	5.43862e-06	1.41861e-05	3.1097
ATP6V1F	0.512739	13.2218	10.8721	8.00487e-19	1.20847e-17	32.2278
DISC1	0.512452	11.7579	5.80805	7.00596e-08	2.25051e-07	7.34044
STIMATE	0.512298	8.77741	6.47887	3.17562e-09	1.17521e-08	10.3708
NIPSNAP3A	0.51224	11.1729	6.15739	1.42368e-08	4.8907e-08	8.89948
EHBP1L1	0.512213	16.656	8.58383	9.87092e-14	6.35652e-13	20.6073
ISY1	0.512179	12.0203	12.4862	2.2253e-22	8.13951e-21	40.3564
MAD2L1BP	0.512109	11.8251	11.2712	1.04157e-19	1.914e-18	34.252
PHF5A	0.512082	10.8954	6.40179	4.56292e-09	1.66328e-08	10.0151
DEFA1B	0.51204	3.84756	3.03538	0.0030385	0.00578278	-2.89273
VAMP8	0.511966	13.2786	8.41807	2.28861e-13	1.40499e-12	19.7753
SMAP2	0.511631	17.4461	5.25638	7.92808e-07	2.2716e-06	4.97592
ODF3B	0.511561	13.4717	4.25489	4.60184e-05	0.000108349	1.05544
STX8	0.511485	10.981	9.14027	5.77846e-15	4.38939e-14	23.4172
KLHL8	0.510964	12.4976	6.31745	6.77101e-09	2.4177e-08	9.62793
ACOT8	0.510927	12.2587	13.3541	2.96713e-24	1.81458e-22	44.6428
ACOT9	0.510752	13.3551	10.6741	2.20708e-18	3.0144e-17	31.2213
KIAA2013	0.510306	14.6171	9.33192	2.1655e-15	1.75165e-14	24.3896
RBM47	0.51013	14.7737	6.07379	2.09225e-08	7.06978e-08	8.52244
H2AFY	0.509503	16.0113	9.91729	1.07369e-16	1.08345e-15	27.3677
RNF130	0.509243	15.863	8.99416	1.21973e-14	8.87548e-14	22.6773
BID	0.509108	14.4879	8.1015	1.13157e-12	6.33884e-12	18.195
SLC15A3	0.508956	14.359	6.41795	4.22968e-09	1.54768e-08	10.0895
CD48	0.508826	15.1652	7.16938	1.15396e-10	5.05808e-10	13.6311
TMEM150B	0.508635	11.0106	5.05478	1.86545e-06	5.13138e-06	4.14534
NPC2	0.508593	14.4232	7.29522	6.23502e-11	2.81191e-10	14.2377
TESMIN	0.508327	10.3525	8.75349	4.16425e-14	2.83066e-13	21.4615
KAZN	0.508297	10.9906	3.54611	0.000588684	0.00122768	-1.3644
C7orf61	0.5082	8.03969	6.58828	1.89302e-09	7.19121e-09	10.8789
TBC1D7	0.508175	10.606	6.60525	1.74651e-09	6.66764e-09	10.958
WASHC3	0.508165	11.3416	8.51383	1.40842e-13	8.88647e-13	20.2556
GP9	0.508083	11.1078	3.55663	0.000568084	0.00118782	-1.33091
GPR137	0.50797	12.1077	10.4851	5.81662e-18	7.4217e-17	30.2597
DCAF12	0.507792	14.9832	4.60707	1.16716e-05	2.93749e-05	2.37298
CBX3	0.507584	13.9216	8.04383	1.51216e-12	8.30605e-12	17.9085
SMIM27	0.507573	10.3982	7.63231	1.18119e-11	5.7819e-11	15.8785
ZNF354A	0.507339	11.6718	4.82691	4.80049e-06	1.26089e-05	3.23031
EMILIN1	0.507232	8.35416	5.79462	7.44224e-08	2.38268e-07	7.28142
CIAO2A	0.507216	11.879	7.96132	2.28774e-12	1.22372e-11	17.4994
MFSD2B	0.507168	9.80744	3.7093	0.000336232	0.000722303	-0.836613
PTTG1IP	0.507051	15.5231	10.5569	4.0248e-18	5.26486e-17	30.6251
[truncated: 10,498 more rows]
